# Supplementary material
Source: PubMed Central journal article supplement (PMC6532519)
Supplement: rspb20190359supp1.pdf [file rspb20190359supp1.pdf]

Figure S1: Distribution of completed fertility by category of IQ for Swedish men born 1951-1967

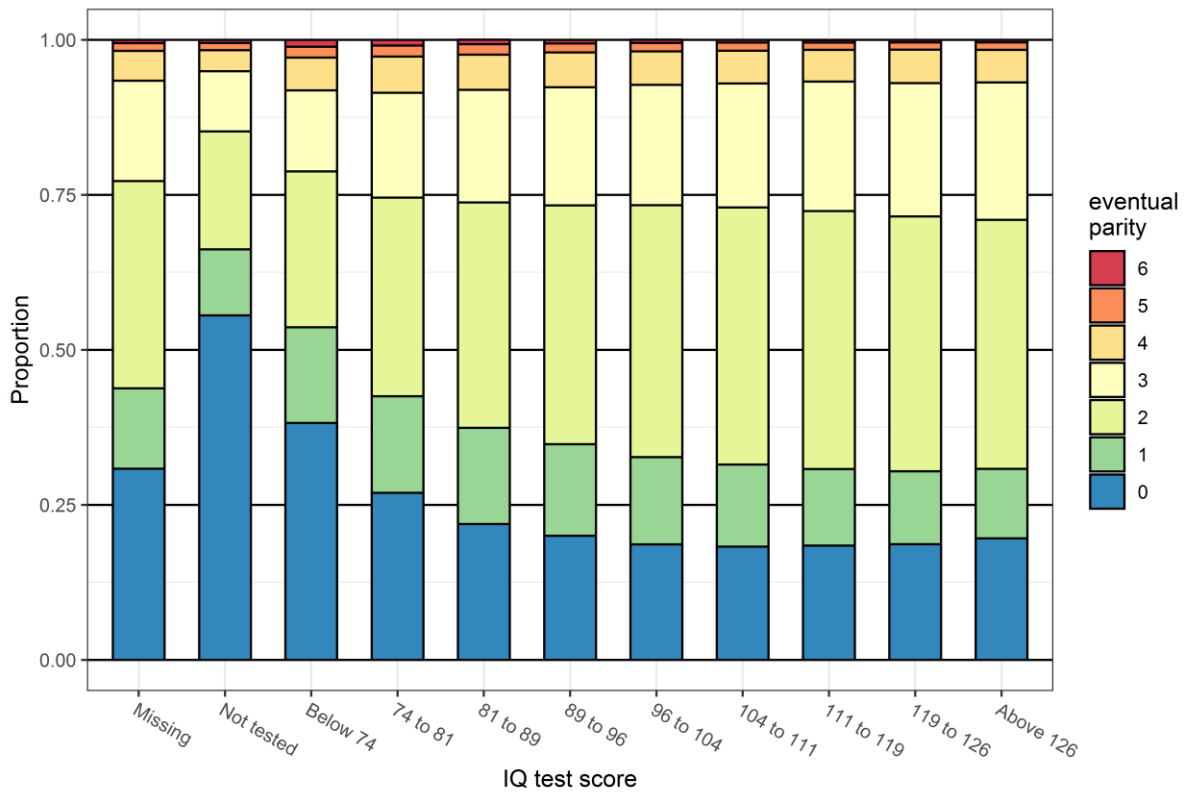

Figure S2: Mean IQ (measured on a discrete stanine scale) for Swedish men born 1951-1967 by completed fertility.

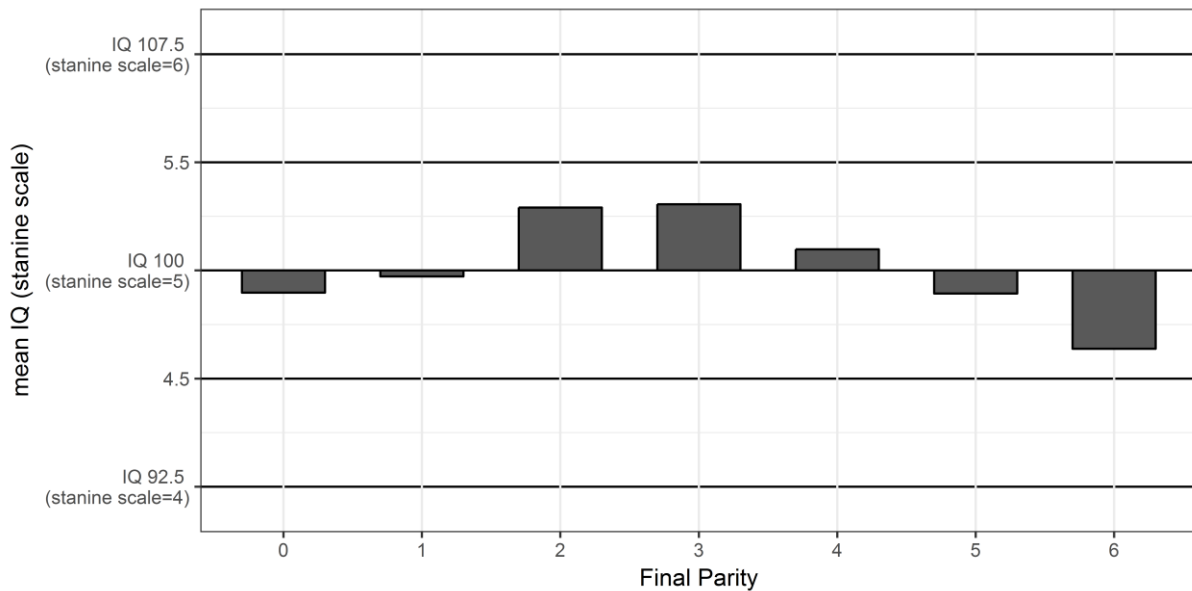

Figure S3: Distribution of completed fertility for Swedish men born 1951-1967, as well as from the children's perspective born to those fathers.

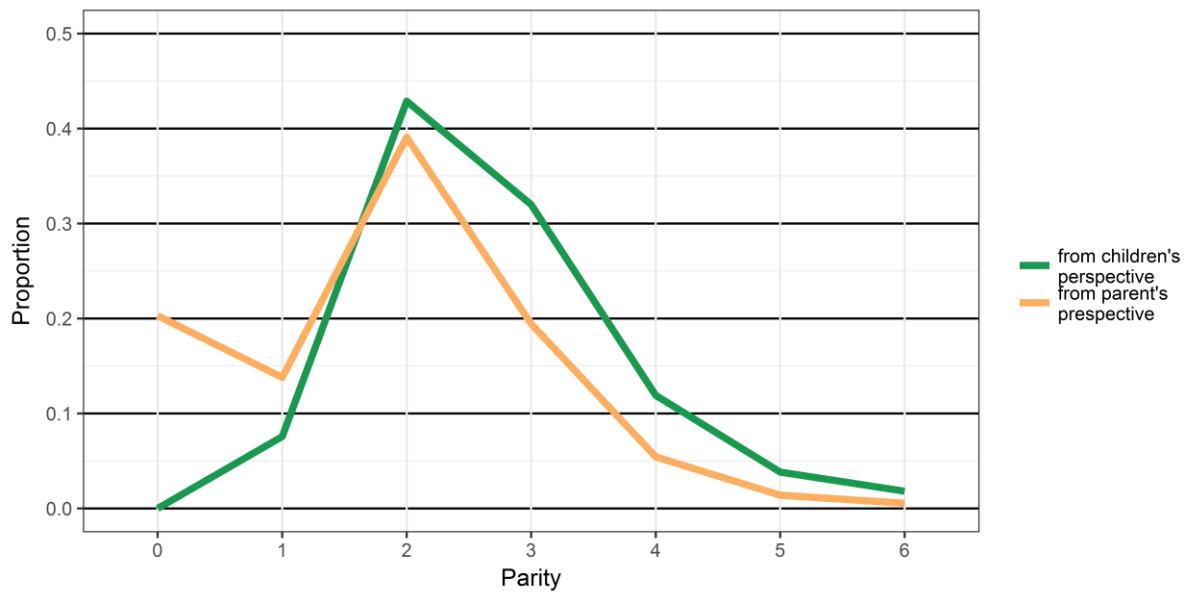

Figure S4: Distribution of age at first birth by IQ scores for Swedish men with at least one child born 1951-1967.

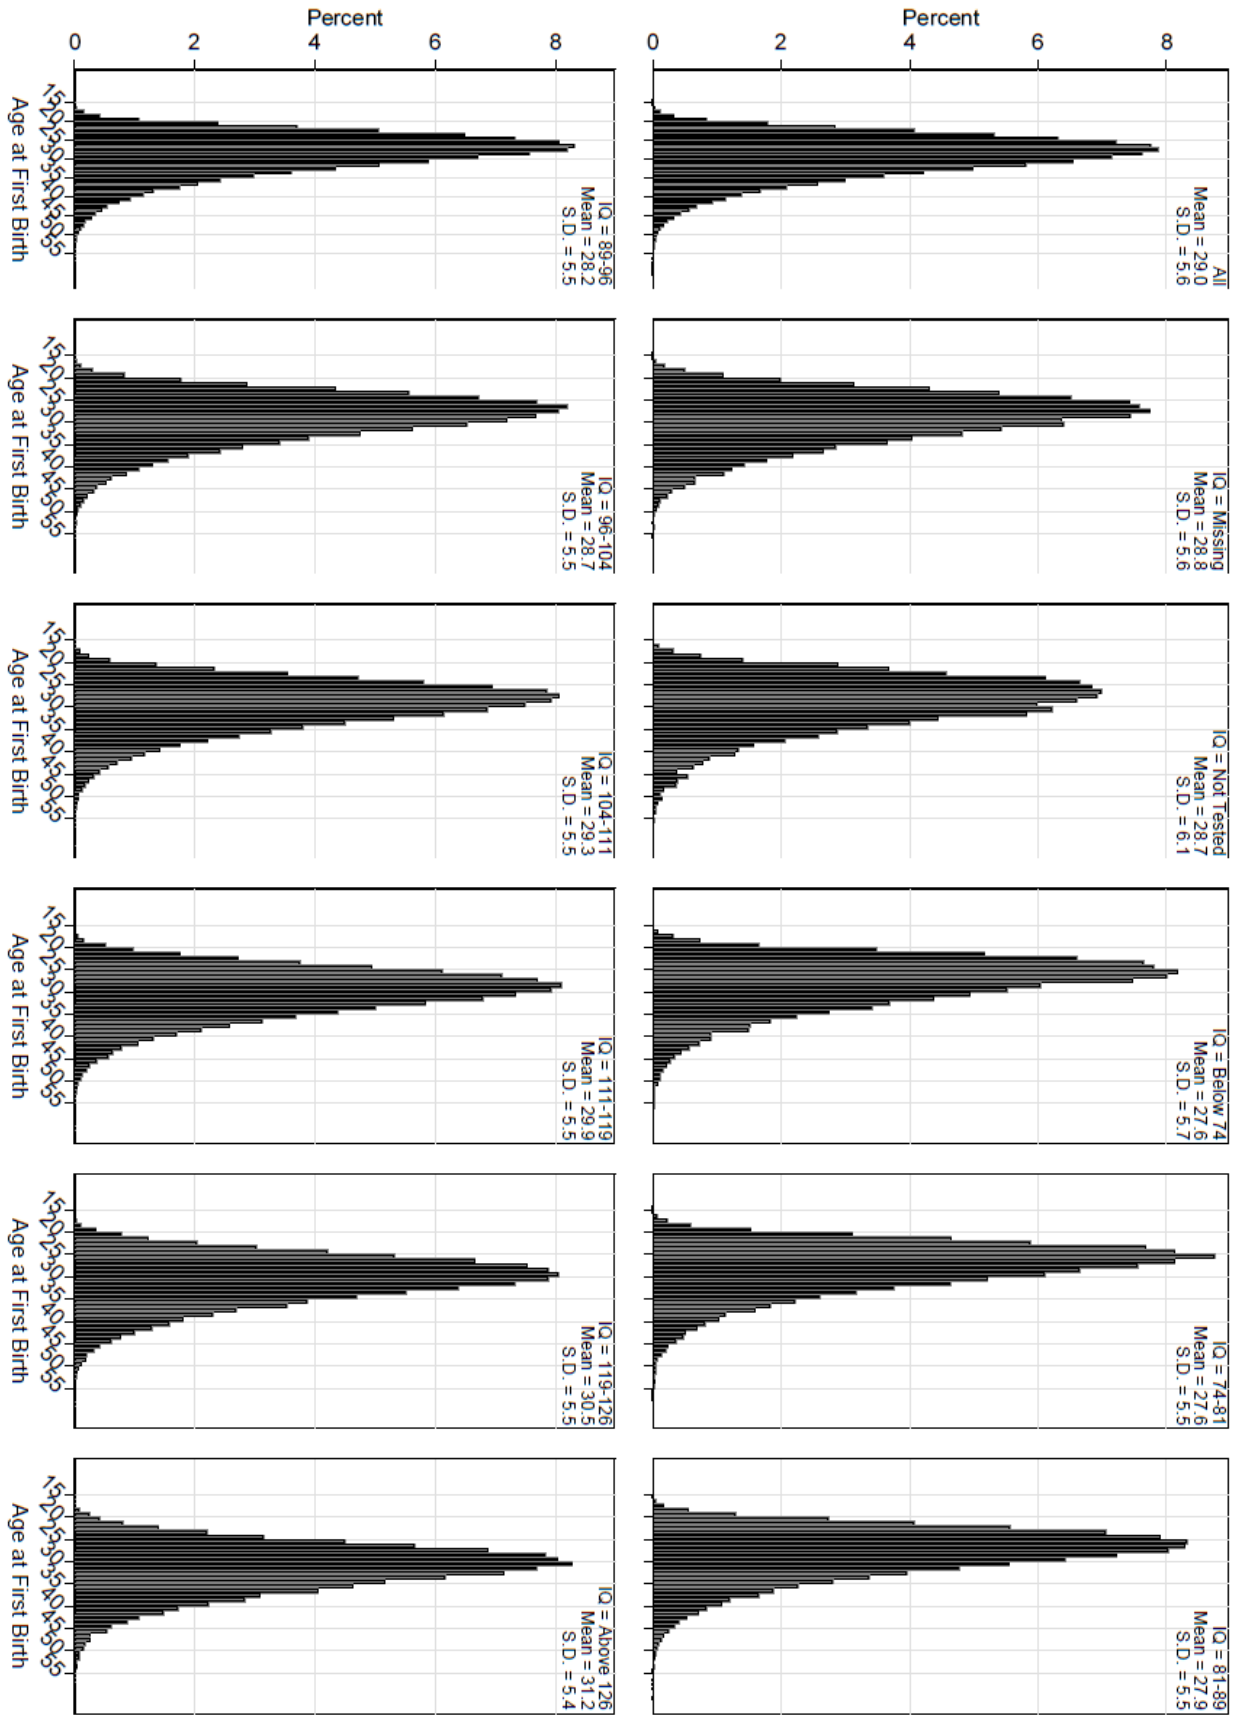

Figure S5: Completed fertility by IQ category for Swedish men born 1951-1967. Contribution to completed fertility by children with first childbearing partner, second partner, and third or higher order partner

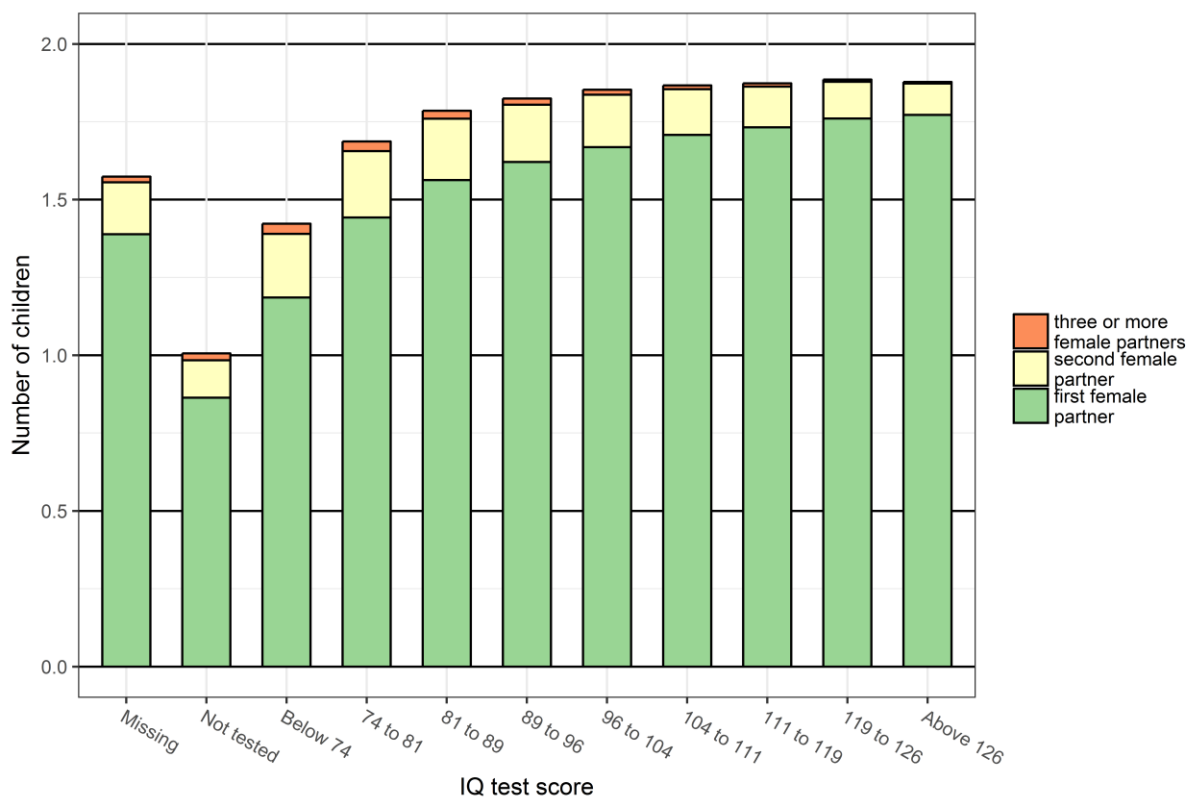

Figure S6: Completed fertility by IQ category for Swedish men born 1951-1967 by educational level.

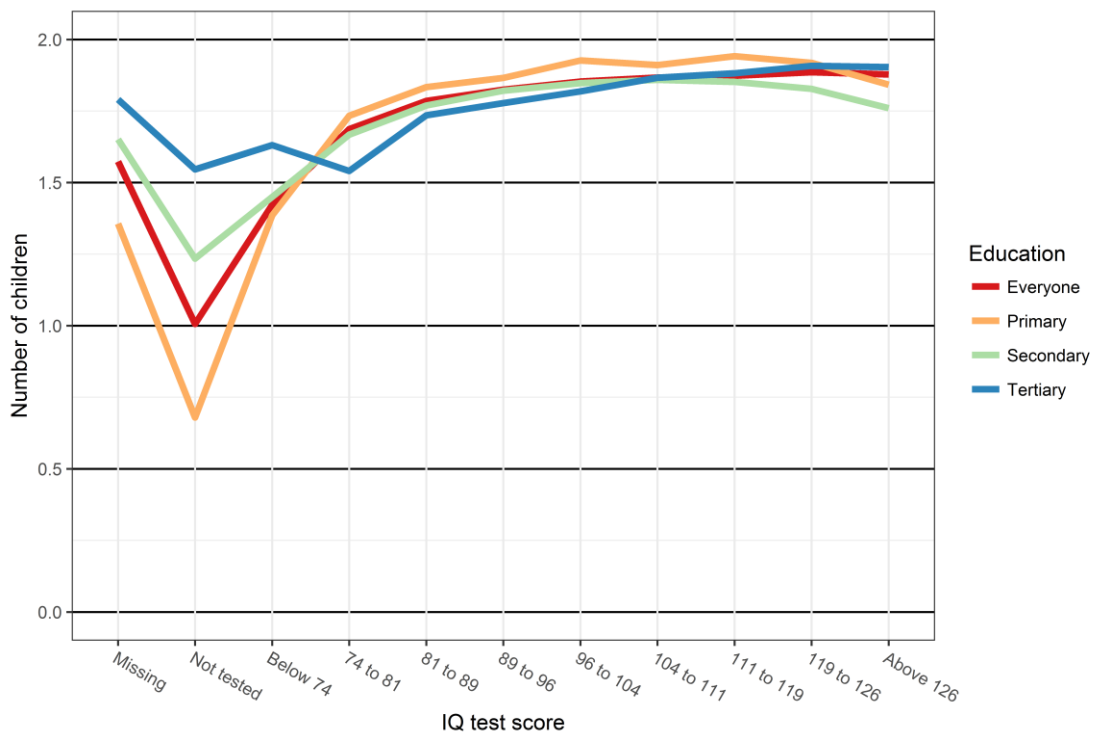

Figure S7: Number of men by education (measured at 2012) and IQ scores for Swedish men born 1951- 1967 (cumulative number of men).

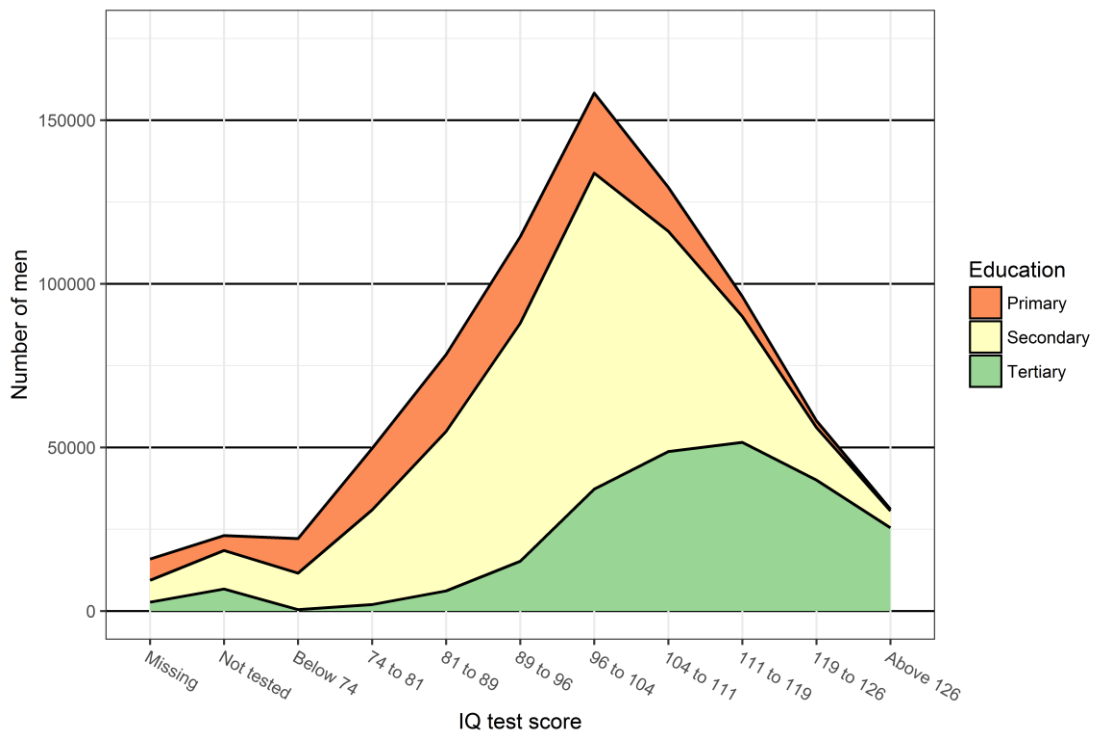

## **SUPPLEMENTARY INFORMATION**

TABLE S1. Mean number of children by IQ and educational attainment for Swedish men born 1951-1967.

| IQ         | Education |      |      |         |      |      |         |      |      |         |      |      |
|------------|-----------|------|------|---------|------|------|---------|------|------|---------|------|------|
|            | Everyone  |      |      | Low     |      |      | Medium  |      |      | High    |      |      |
|            | N         | Mean | SD   | N       | Mean | SD   | N       | Mean | SD   | N       | Mean | SD   |
| Below 74   | 22,168    | 1.42 | 1.45 | 10,539  | 1.39 | 1.47 | 11,140  | 1.45 | 1.43 | 428     | 1.63 | 1.43 |
| 74 to 81   | 49,797    | 1.69 | 1.38 | 18,820  | 1.73 | 1.41 | 28,903  | 1.67 | 1.37 | 1,982   | 1.54 | 1.25 |
| 81 to 89   | 78,507    | 1.79 | 1.31 | 23,533  | 1.83 | 1.34 | 48,762  | 1.77 | 1.30 | 6,115   | 1.74 | 1.24 |
| 89 to 96   | 114,528   | 1.82 | 1.26 | 26,467  | 1.87 | 1.30 | 72,705  | 1.82 | 1.26 | 15,219  | 1.78 | 1.22 |
| 96 to 104  | 158,437   | 1.85 | 1.23 | 24,472  | 1.93 | 1.29 | 96,569  | 1.85 | 1.23 | 37,242  | 1.82 | 1.18 |
| 104 to 111 | 129,568   | 1.87 | 1.21 | 13,431  | 1.91 | 1.28 | 67,318  | 1.86 | 1.22 | 48,740  | 1.87 | 1.18 |
| 111 to 119 | 96,181    | 1.87 | 1.21 | 6,105   | 1.94 | 1.30 | 38,472  | 1.85 | 1.23 | 51,553  | 1.88 | 1.17 |
| 119 to 126 | 58,141    | 1.89 | 1.21 | 2,072   | 1.92 | 1.31 | 16,050  | 1.83 | 1.25 | 39,997  | 1.91 | 1.19 |
| Above 126  | 31,082    | 1.88 | 1.23 | 506     | 1.84 | 1.52 | 5,157   | 1.76 | 1.29 | 25,407  | 1.90 | 1.21 |
| Not Tested | 16,769    | 1.01 | 1.34 | 6,522   | 0.68 | 1.24 | 6,670   | 1.23 | 1.39 | 2,704   | 1.55 | 1.30 |
| Missing    | 23,968    | 1.57 | 1.33 | 4,561   | 1.36 | 1.44 | 11,769  | 1.65 | 1.32 | 6,733   | 1.79 | 1.20 |
| Total      | 779,146   | 1.80 | 1.27 | 137,028 | 1.75 | 1.37 | 403,515 | 1.79 | 1.27 | 236,120 | 1.86 | 1.19 |





TABLE S3. Mean number of children by IQ and birth cohort for Swedish men born 1951-1967.

| IQ         | Birth Cohort |      |      |           |      |      |           |      |      |           |      |      |
|------------|--------------|------|------|-----------|------|------|-----------|------|------|-----------|------|------|
|            | Everyone     |      |      | 1951-1956 |      |      | 1957-1962 |      |      | 1963-1967 |      |      |
|            | N            | Mean | SD   | N         | Mean | SD   | N         | Mean | SD   | N         | Mean | SD   |
| Below 74   | 22,168       | 1.42 | 1.45 | 8,970     | 1.44 | 1.45 | 5,927     | 1.43 | 1.47 | 7,271     | 1.39 | 1.43 |
| 74 to 81   | 49,797       | 1.69 | 1.38 | 17,700    | 1.73 | 1.39 | 15,653    | 1.67 | 1.40 | 16,444    | 1.65 | 1.35 |
| 81 to 89   | 78,507       | 1.79 | 1.31 | 27,536    | 1.83 | 1.34 | 23,679    | 1.79 | 1.32 | 27,292    | 1.73 | 1.26 |
| 89 to 96   | 114,528      | 1.82 | 1.26 | 41,540    | 1.87 | 1.29 | 34,781    | 1.84 | 1.27 | 38,207    | 1.77 | 1.22 |
| 96 to 104  | 158,437      | 1.85 | 1.23 | 51,293    | 1.92 | 1.27 | 45,049    | 1.87 | 1.24 | 62,095    | 1.79 | 1.18 |
| 104 to 111 | 129,568      | 1.87 | 1.21 | 48,913    | 1.93 | 1.24 | 37,826    | 1.88 | 1.22 | 42,829    | 1.79 | 1.16 |
| 111 to 119 | 96,181       | 1.87 | 1.21 | 37,280    | 1.94 | 1.24 | 27,387    | 1.89 | 1.21 | 31,514    | 1.77 | 1.15 |
| 119 to 126 | 58,141       | 1.89 | 1.21 | 22,994    | 1.97 | 1.25 | 16,126    | 1.89 | 1.22 | 19,021    | 1.78 | 1.15 |
| Above 126  | 31,082       | 1.88 | 1.23 | 12,278    | 1.97 | 1.26 | 7,911     | 1.90 | 1.23 | 10,893    | 1.76 | 1.19 |
| Not Tested | 16,769       | 1.01 | 1.34 | 8,292     | 1.08 | 1.38 | 6,116     | 0.95 | 1.31 | 2,361     | 0.90 | 1.30 |
| Missing    | 23,968       | 1.57 | 1.33 | 4,007     | 1.75 | 1.37 | 7,940     | 1.73 | 1.32 | 12,021    | 1.41 | 1.30 |

TABLE S4. Final parity by IQ and birth cohort for Swedish men born 1951-1967.

| IQ        | Parity | Everyone  |      |        |           |        |      | Birth Cohort |      |            |           |        |      |           |      |        |      |        |      |
|-----------|--------|-----------|------|--------|-----------|--------|------|--------------|------|------------|-----------|--------|------|-----------|------|--------|------|--------|------|
|           |        | 1951-1956 |      |        | 1957-1962 |        |      | 1951-1956    |      |            | 1957-1962 |        |      | 1963-1967 |      |        |      |        |      |
|           |        | N         | %    |        | N         | %      |      | N            | %    |            | N         | %      |      | N         | %    |        | N    | %      |      |
| Below 74  | 0      | 8,465     | 38.2 | 3,414  | 38.1      | 2,291  | 38.7 | 2,760        | 38.0 | 104 to 111 | 0         | 23,671 | 18.3 | 8,564     | 17.5 | 6,985  | 18.5 | 8,122  | 19.0 |
|           | 1      | 3,423     | 15.4 | 1,350  | 15.1      | 867    | 14.6 | 1,206        | 16.6 |            | 1         | 17,141 | 13.2 | 6,447     | 13.2 | 4,798  | 12.7 | 5,896  | 13.8 |
|           | 2      | 5,577     | 25.2 | 2,219  | 24.7      | 1,475  | 24.9 | 1,883        | 25.9 |            | 2         | 53,723 | 41.5 | 19,286    | 39.4 | 15,572 | 41.2 | 18,865 | 44.1 |
|           | 3      | 2,897     | 13.1 | 1,227  | 13.7      | 790    | 13.3 | 880          | 12.1 |            | 3         | 25,918 | 20.0 | 10,566    | 21.6 | 7,726  | 20.4 | 7,626  | 17.8 |
|           | 4      | 1,167     | 5.3  | 499    | 5.6       | 319    | 5.4  | 349          | 4.8  |            | 4         | 6,855  | 5.3  | 3,022     | 6.2  | 2,068  | 5.5  | 1,765  | 4.1  |
|           | 5      | 391       | 1.8  | 167    | 1.9       | 120    | 2.0  | 104          | 1.4  |            | 5         | 1,683  | 1.3  | 732       | 1.5  | 522    | 1.4  | 429    | 1.0  |
|           | 6+     | 248       | 1.1  | 94     | 1.1       | 65     | 1.1  | 89           | 1.2  |            | 6+        | 577    | 0.5  | 296       | 0.6  | 155    | 0.4  | 126    | 0.3  |
| 74 to 81  | 0      | 13,421    | 27.0 | 4,606  | 26.0      | 4,416  | 28.2 | 4,399        | 26.8 | 111 to 119 | 0         | 17,719 | 18.4 | 6,464     | 17.3 | 5,031  | 18.4 | 6,224  | 19.8 |
|           | 1      | 7,746     | 15.6 | 2,706  | 15.3      | 2,344  | 15.0 | 2,696        | 16.4 |            | 1         | 11,902 | 12.4 | 4,688     | 12.6 | 3,202  | 11.7 | 4,012  | 12.7 |
|           | 2      | 15,952    | 32.0 | 5,655  | 32.0      | 4,824  | 30.8 | 5,473        | 33.3 |            | 2         | 40,016 | 41.6 | 14,745    | 39.6 | 11,371 | 41.5 | 13,900 | 44.1 |
|           | 3      | 8,433     | 16.9 | 3,131  | 17.7      | 2,724  | 17.4 | 2,578        | 15.7 |            | 3         | 20,080 | 20.9 | 8,355     | 22.4 | 5,895  | 21.5 | 5,830  | 18.5 |
|           | 4      | 2,910     | 5.8  | 1,117  | 6.3       | 917    | 5.9  | 876          | 5.3  |            | 4         | 4,929  | 5.1  | 2,241     | 6.0  | 1,459  | 5.3  | 1,229  | 3.9  |
|           | 5      | 885       | 1.8  | 308    | 1.7       | 296    | 1.9  | 281          | 1.7  |            | 5         | 1,127  | 1.2  | 562       | 1.5  | 314    | 1.2  | 251    | 0.8  |
|           | 6+     | 450       | 0.9  | 177    | 1.0       | 132    | 0.8  | 141          | 0.9  |            | 6+        | 408    | 0.4  | 225       | 0.6  | 115    | 0.4  | 68     | 0.2  |
| 81 to 89  | 0      | 17,199    | 21.9 | 5,903  | 21.4      | 5,262  | 22.2 | 6,034        | 22.1 | 119 to 126 | 0         | 10,850 | 18.7 | 4,011     | 17.4 | 3,072  | 19.1 | 3,767  | 19.8 |
|           | 1      | 12,182    | 15.5 | 4,219  | 15.3      | 3,563  | 15.1 | 4,400        | 16.1 |            | 1         | 6,843  | 11.8 | 2,696     | 11.7 | 1,807  | 11.2 | 2,340  | 12.3 |
|           | 2      | 28,530    | 36.3 | 9,624  | 35.0      | 8,535  | 36.0 | 10,371       | 38.0 |            | 2         | 23,885 | 41.1 | 8,979     | 39.1 | 6,594  | 40.9 | 8,312  | 43.7 |
|           | 3      | 14,260    | 18.2 | 5,290  | 19.2      | 4,382  | 18.5 | 4,588        | 16.8 |            | 3         | 12,509 | 21.5 | 5,327     | 23.2 | 3,492  | 21.7 | 3,690  | 19.4 |
|           | 4      | 4,441     | 5.7  | 1,700  | 6.2       | 1,376  | 5.8  | 1,365        | 5.0  |            | 4         | 3,131  | 5.4  | 1,501     | 6.5  | 889    | 5.5  | 741    | 3.9  |
|           | 5      | 1,341     | 1.7  | 567    | 2.1       | 398    | 1.7  | 376          | 1.4  |            | 5         | 678    | 1.2  | 351       | 1.5  | 201    | 1.3  | 126    | 0.7  |
|           | 6+     | 554       | 0.7  | 233    | 0.9       | 163    | 0.7  | 158          | 0.6  |            | 6+        | 245    | 0.4  | 129       | 0.6  | 71     | 0.4  | 45     | 0.2  |
| 89 to 96  | 0      | 22,945    | 20.0 | 8,202  | 19.7      | 7,035  | 20.2 | 7,708        | 20.2 | Above 126  | 0         | 6,091  | 19.6 | 2,179     | 17.8 | 1,523  | 19.3 | 2,389  | 21.9 |
|           | 1      | 16,907    | 14.8 | 6,048  | 14.6      | 4,990  | 14.4 | 5,869        | 15.4 |            | 1         | 3,484  | 11.2 | 1,401     | 11.4 | 833    | 10.5 | 1,250  | 11.5 |
|           | 2      | 44,091    | 38.5 | 15,336 | 36.9      | 13,251 | 38.1 | 15,504       | 40.6 |            | 2         | 12,479 | 40.2 | 4,690     | 38.2 | 3,233  | 40.9 | 4,556  | 41.8 |
|           | 3      | 21,812    | 19.1 | 8,436  | 20.3      | 6,684  | 19.2 | 6,692        | 17.5 |            | 3         | 6,889  | 22.2 | 2,952     | 24.0 | 1,755  | 22.2 | 2,182  | 20.0 |
|           | 4      | 6,447     | 5.6  | 2,532  | 6.1       | 2,108  | 6.1  | 1,807        | 4.7  |            | 4         | 1,638  | 5.3  | 802       | 6.5  | 434    | 5.5  | 402    | 3.7  |
|           | 5      | 1,661     | 1.5  | 705    | 1.7       | 506    | 1.5  | 450          | 1.2  |            | 5         | 373    | 1.2  | 194       | 1.6  | 90     | 1.1  | 89     | 0.8  |
|           | 6+     | 665       | 0.6  | 281    | 0.7       | 207    | 0.6  | 177          | 0.5  |            | 6+        | 128    | 0.4  | 60        | 0.5  | 43     | 0.5  | 25     | 0.2  |
| 96 to 104 | 0      | 29,516    | 18.6 | 9,164  | 17.9      | 8,533  | 18.9 | 11,819       | 19.0 | Not Tested | 0         | 9,319  | 55.6 | 4,404     | 53.1 | 3,498  | 57.2 | 1,417  | 60.0 |
|           | 1      | 22,278    | 14.1 | 7,117  | 13.9      | 6,146  | 13.6 | 9,015        | 14.5 |            | 1         | 1,782  | 10.6 | 890       | 10.7 | 669    | 10.9 | 223    | 9.5  |
|           | 2      | 64,369    | 40.6 | 19,728 | 38.5      | 17,893 | 39.7 | 26,748       | 43.1 |            | 2         | 3,193  | 19.0 | 1,648     | 19.9 | 1,113  | 18.2 | 432    | 18.3 |
|           | 3      | 30,762    | 19.4 | 10,916 | 21.3      | 9,071  | 20.1 | 10,775       | 17.4 |            | 3         | 1,627  | 9.7  | 896       | 10.8 | 548    | 9.0  | 183    | 7.8  |
|           | 4      | 8,551     | 5.4  | 3,199  | 6.2       | 2,466  | 5.5  | 2,886        | 4.7  |            | 4         | 569    | 3.4  | 303       | 3.7  | 194    | 3.2  | 72     | 3.1  |
|           | 5      | 2,159     | 1.4  | 818    | 1.6       | 696    | 1.5  | 645          | 1.0  |            | 5         | 194    | 1.2  | 102       | 1.2  | 68     | 1.1  | 24     | 1.0  |
|           | 6+     | 802       | 0.5  | 351    | 0.7       | 244    | 0.5  | 207          | 0.3  | Missing    | 6+        | 85     | 0.5  | 49        | 0.6  | 26     | 0.4  | 10     | 0.4  |
|           |        |           |      |        |           |        |      |              |      |            | 0         | 7,390  | 30.8 | 1,067     | 26.6 | 2,023  | 25.5 | 4,300  | 35.8 |
|           |        |           |      |        |           |        |      |              |      |            | 1         | 3,106  | 13.0 | 494       | 12.3 | 1,007  | 12.7 | 1,605  | 13.4 |
|           |        |           |      |        |           |        |      |              |      |            | 2         | 8,010  | 33.4 | 1,342     | 33.5 | 2,865  | 36.1 | 3,803  | 31.6 |
|           |        |           |      |        |           |        |      |              |      |            | 3         | 3,884  | 16.2 | 758       | 18.9 | 1,430  | 18.0 | 1,696  | 14.1 |
|           |        |           |      |        |           |        |      |              |      |            | 4         | 1,154  | 4.8  | 232       | 5.8  | 451    | 5.7  | 471    | 3.9  |
|           |        |           |      |        |           |        |      |              |      |            | 5         | 298    | 1.2  | 84        | 2.1  | 110    | 1.4  | 104    | 0.9  |
|           |        |           |      |        |           |        |      |              |      |            | 6+        | 126    | 0.5  | 30        | 0.8  | 54     | 0.7  | 42     | 0.4  |

TABLE S5. Mean number of children by partner order and IQ for Swedish men born 1951-1967.

| IQ         | Childbearing Partner Order |      |      |      |      |      |
|------------|----------------------------|------|------|------|------|------|
|            | 1                          |      | 2    |      | 3+   |      |
|            | Mean                       | SD   | Mean | SD   | Mean | SD   |
| Below 74   | 1.19                       | 1.20 | 0.20 | 0.63 | 0.03 | 0.27 |
| 74 to 81   | 1.44                       | 1.17 | 0.21 | 0.63 | 0.03 | 0.27 |
| 81 to 89   | 1.56                       | 1.14 | 0.20 | 0.60 | 0.03 | 0.24 |
| 89 to 96   | 1.62                       | 1.12 | 0.18 | 0.58 | 0.02 | 0.20 |
| 96 to 104  | 1.67                       | 1.10 | 0.17 | 0.55 | 0.02 | 0.18 |
| 104 to 111 | 1.71                       | 1.10 | 0.15 | 0.52 | 0.01 | 0.16 |
| 111 to 119 | 1.73                       | 1.11 | 0.13 | 0.49 | 0.01 | 0.15 |
| 119 to 126 | 1.76                       | 1.13 | 0.12 | 0.47 | 0.01 | 0.11 |
| Above 126  | 1.77                       | 1.16 | 0.10 | 0.44 | 0.00 | 0.09 |
| Not Tested | 0.86                       | 1.15 | 0.12 | 0.48 | 0.02 | 0.22 |
| Missing    | 1.39                       | 1.17 | 0.17 | 0.54 | 0.02 | 0.19 |

TABLE S6. Mean number of children by IQ and age at measurement for Swedish men born 1951-1967.

| IQ         | Age at Measurement |      |      |         |      |      |         |      |      |         |      |      |         |      |      |         |      |      |
|------------|--------------------|------|------|---------|------|------|---------|------|------|---------|------|------|---------|------|------|---------|------|------|
|            | 25                 |      |      | 30      |      |      | 35      |      |      | 40      |      |      | 45      |      |      | 50      |      |      |
|            | N                  | Mean | SD   | N       | Mean | SD   | N       | Mean | SD   | N       | Mean | SD   | N       | Mean | SD   | N       | Mean | SD   |
| Below 74   | 22,168             | 0.35 | 0.65 | 22,168  | 0.79 | 1.02 | 22,168  | 1.14 | 1.24 | 22,168  | 1.32 | 1.37 | 22,168  | 1.40 | 1.43 | 22,168  | 1.42 | 1.44 |
| 74 to 81   | 49,797             | 0.39 | 0.67 | 49,797  | 0.95 | 1.04 | 49,797  | 1.37 | 1.23 | 49,797  | 1.58 | 1.32 | 49,797  | 1.66 | 1.36 | 49,797  | 1.68 | 1.38 |
| 81 to 89   | 78,507             | 0.39 | 0.66 | 78,507  | 0.99 | 1.02 | 78,507  | 1.44 | 1.18 | 78,507  | 1.68 | 1.26 | 78,507  | 1.76 | 1.29 | 78,507  | 1.78 | 1.30 |
| 89 to 96   | 114,528            | 0.36 | 0.64 | 114,528 | 0.98 | 1.01 | 114,528 | 1.46 | 1.16 | 114,528 | 1.71 | 1.22 | 114,528 | 1.80 | 1.25 | 114,528 | 1.82 | 1.26 |
| 96 to 104  | 158,437            | 0.32 | 0.61 | 158,437 | 0.94 | 0.99 | 158,437 | 1.45 | 1.14 | 158,437 | 1.72 | 1.19 | 158,437 | 1.82 | 1.21 | 158,437 | 1.85 | 1.22 |
| 104 to 111 | 129,568            | 0.27 | 0.56 | 129,568 | 0.87 | 0.97 | 129,568 | 1.43 | 1.13 | 129,568 | 1.73 | 1.18 | 129,568 | 1.83 | 1.20 | 129,568 | 1.86 | 1.21 |
| 111 to 119 | 96,181             | 0.21 | 0.51 | 96,181  | 0.79 | 0.94 | 96,181  | 1.38 | 1.13 | 96,181  | 1.71 | 1.17 | 96,181  | 1.83 | 1.19 | 96,181  | 1.87 | 1.20 |
| 119 to 126 | 58,141             | 0.17 | 0.47 | 58,141  | 0.72 | 0.92 | 58,141  | 1.35 | 1.14 | 58,141  | 1.71 | 1.19 | 58,141  | 1.84 | 1.20 | 58,141  | 1.88 | 1.21 |
| Above 126  | 31,082             | 0.13 | 0.40 | 31,082  | 0.63 | 0.88 | 31,082  | 1.28 | 1.14 | 31,082  | 1.68 | 1.20 | 31,082  | 1.83 | 1.22 | 31,082  | 1.87 | 1.22 |
| Not Tested | 16,769             | 0.19 | 0.50 | 16,769  | 0.49 | 0.86 | 16,769  | 0.76 | 1.12 | 16,769  | 0.92 | 1.26 | 16,769  | 0.98 | 1.31 | 16,769  | 1.00 | 1.33 |
| Missing    | 23,968             | 0.28 | 0.59 | 23,968  | 0.78 | 0.99 | 23,968  | 1.21 | 1.18 | 23,968  | 1.45 | 1.27 | 23,968  | 1.55 | 1.31 | 23,968  | 1.57 | 1.33 |

TABLE S7. Final parity by IQ and age at measurement for Swedish men born 1951-1967.

| IQ        | Parity | Age     |      |        |      |        |      |        |      |        |      |        |      |
|-----------|--------|---------|------|--------|------|--------|------|--------|------|--------|------|--------|------|
|           |        | 25      |      | 30     |      | 35     |      | 40     |      | 45     |      | 50     |      |
|           |        | N       | %    | N      | %    | N      | %    | N      | %    | N      | %    | N      | %    |
| Below 74  | 0      | 16,457  | 74.2 | 12,073 | 54.5 | 9,814  | 44.3 | 8,902  | 40.2 | 8,581  | 38.7 | 8,486  | 38.3 |
|           | 1      | 3,992   | 18.0 | 4,396  | 19.8 | 3,925  | 17.7 | 3,519  | 15.9 | 3,416  | 15.4 | 3,423  | 15.4 |
|           | 2      | 1,514   | 6.8  | 4,236  | 19.1 | 5,226  | 23.6 | 5,552  | 25.1 | 5,582  | 25.2 | 5,574  | 25.1 |
|           | 3      | 182     | 0.8  | 1,181  | 5.3  | 2,300  | 10.4 | 2,732  | 12.3 | 2,858  | 12.9 | 2,897  | 13.1 |
|           | 4      | 19      | 0.1  | 233    | 1.1  | 692    | 3.1  | 1,028  | 4.6  | 1,157  | 5.2  | 1,162  | 5.2  |
|           | 5      | 4       | 0.0  | 36     | 0.2  | 159    | 0.7  | 299    | 1.4  | 368    | 1.7  | 386    | 1.7  |
|           | 6+     | 0       | 0.0  | 13     | 0.1  | 52     | 0.2  | 136    | 0.6  | 206    | 0.9  | 240    | 1.1  |
| 74 to 81  | 0      | 35,018  | 70.3 | 22,769 | 45.7 | 16,812 | 33.8 | 14,480 | 29.1 | 13,652 | 27.4 | 13,471 | 27.1 |
|           | 1      | 10,475  | 21.0 | 11,236 | 22.6 | 9,028  | 18.1 | 8,017  | 16.1 | 7,814  | 15.7 | 7,740  | 15.5 |
|           | 2      | 3,847   | 7.7  | 11,924 | 24.0 | 15,312 | 30.8 | 15,882 | 31.9 | 15,956 | 32.0 | 15,959 | 32.1 |
|           | 3      | 428     | 0.9  | 3,252  | 6.5  | 6,550  | 13.2 | 8,023  | 16.1 | 8,376  | 16.8 | 8,425  | 16.9 |
|           | 4      | 27      | 0.1  | 523    | 1.1  | 1,649  | 3.3  | 2,465  | 5.0  | 2,796  | 5.6  | 2,895  | 5.8  |
|           | 5      | 2       | 0.0  | 76     | 0.2  | 347    | 0.7  | 661    | 1.3  | 820    | 1.7  | 875    | 1.8  |
|           | 6+     | 0       | 0.0  | 17     | 0.0  | 99     | 0.2  | 269    | 0.5  | 383    | 0.8  | 432    | 0.9  |
| 81 to 89  | 0      | 55,374  | 70.5 | 33,591 | 42.8 | 23,049 | 29.4 | 18,970 | 24.2 | 17,587 | 22.4 | 17,270 | 22.0 |
|           | 1      | 16,538  | 21.1 | 18,899 | 24.1 | 14,753 | 18.8 | 12,721 | 16.2 | 12,309 | 15.7 | 12,176 | 15.5 |
|           | 2      | 6,021   | 7.7  | 20,289 | 25.8 | 27,135 | 34.6 | 28,383 | 36.2 | 28,523 | 36.3 | 28,562 | 36.4 |
|           | 3      | 543     | 0.7  | 4,943  | 6.3  | 10,655 | 13.6 | 13,487 | 17.2 | 14,136 | 18.0 | 14,252 | 18.2 |
|           | 4      | 28      | 0.0  | 680    | 0.9  | 2,338  | 3.0  | 3,660  | 4.7  | 4,249  | 5.4  | 4,394  | 5.6  |
|           | 5      | 3       | 0.0  | 92     | 0.1  | 446    | 0.6  | 954    | 1.2  | 1,226  | 1.6  | 1,322  | 1.7  |
|           | 6+     | 0       | 0.0  | 13     | 0.0  | 131    | 0.2  | 332    | 0.4  | 477    | 0.6  | 531    | 0.7  |
| 89 to 96  | 0      | 82,754  | 72.3 | 49,188 | 43.0 | 32,320 | 28.2 | 25,729 | 22.5 | 23,546 | 20.6 | 23,047 | 20.1 |
|           | 1      | 22,854  | 20.0 | 27,502 | 24.0 | 21,123 | 18.4 | 17,897 | 15.6 | 17,095 | 14.9 | 16,931 | 14.8 |
|           | 2      | 8,175   | 7.1  | 29,955 | 26.2 | 41,468 | 36.2 | 43,731 | 38.2 | 44,075 | 38.5 | 44,121 | 38.5 |
|           | 3      | 702     | 0.6  | 6,875  | 6.0  | 15,727 | 13.7 | 20,414 | 17.8 | 21,602 | 18.9 | 21,756 | 19.0 |
|           | 4      | 39      | 0.0  | 886    | 0.8  | 3,221  | 2.8  | 5,209  | 4.6  | 6,131  | 5.4  | 6,401  | 5.6  |
|           | 5      | 3       | 0.0  | 100    | 0.1  | 542    | 0.5  | 1,195  | 1.0  | 1,529  | 1.3  | 1,636  | 1.4  |
|           | 6      | 1       | 0.0  | 22     | 0.0  | 127    | 0.1  | 353    | 0.3  | 550    | 0.5  | 636    | 0.6  |
| 96 to 104 | 0      | 119,462 | 75.4 | 70,948 | 44.8 | 44,549 | 28.1 | 33,894 | 21.4 | 30,416 | 19.2 | 29,647 | 18.7 |
|           | 1      | 28,487  | 18.0 | 37,725 | 23.8 | 29,133 | 18.4 | 24,087 | 15.2 | 22,528 | 14.2 | 22,311 | 14.1 |
|           | 2      | 9,608   | 6.1  | 39,941 | 25.2 | 58,835 | 37.1 | 63,510 | 40.1 | 64,459 | 40.7 | 64,431 | 40.7 |
|           | 3      | 825     | 0.5  | 8,627  | 5.5  | 21,091 | 13.3 | 28,240 | 17.8 | 30,328 | 19.1 | 30,704 | 19.4 |
|           | 4      | 52      | 0.0  | 1,062  | 0.7  | 4,040  | 2.6  | 6,866  | 4.3  | 8,139  | 5.1  | 8,480  | 5.4  |
|           | 5      | 3       | 0.0  | 113    | 0.1  | 662    | 0.4  | 1,407  | 0.9  | 1,899  | 1.2  | 2,092  | 1.3  |
|           | 6+     | 0       | 0.0  | 21     | 0.0  | 127    | 0.1  | 433    | 0.3  | 668    | 0.4  | 772    | 0.5  |

TABLE S7 (CONTINUED). Final parity by IQ and age at measurement for Swedish men born 1951-1967.

| IQ         | Parity | Age     |      |        |      |        |      |        |      |        |      |        |      |
|------------|--------|---------|------|--------|------|--------|------|--------|------|--------|------|--------|------|
|            |        | 25      |      | 30     |      | 35     |      | 40     |      | 45     |      | 50     |      |
|            |        | N       | %    | N      | %    | N      | %    | N      | %    | N      | %    | N      | %    |
| 104 to 111 | 0      | 102,400 | 79.0 | 61,950 | 47.8 | 37,558 | 29.0 | 27,707 | 21.4 | 24,554 | 19.0 | 23,817 | 18.4 |
|            | 1      | 20,473  | 15.8 | 30,215 | 23.3 | 23,620 | 18.2 | 18,824 | 14.5 | 17,355 | 13.4 | 17,156 | 13.2 |
|            | 2      | 6,189   | 4.8  | 30,641 | 23.7 | 48,121 | 37.1 | 52,700 | 40.7 | 53,720 | 41.5 | 53,763 | 41.5 |
|            | 3      | 479     | 0.4  | 5,998  | 4.6  | 16,771 | 12.9 | 23,691 | 18.3 | 25,604 | 19.8 | 25,907 | 20.0 |
|            | 4      | 26      | 0.0  | 693    | 0.5  | 2,972  | 2.3  | 5,315  | 4.1  | 6,439  | 5.0  | 6,753  | 5.2  |
|            | 5      | 1       | 0.0  | 65     | 0.1  | 440    | 0.3  | 1,039  | 0.8  | 1,451  | 1.1  | 1,631  | 1.3  |
|            | 6+     | 0       | 0.0  | 6      | 0.0  | 86     | 0.1  | 292    | 0.2  | 445    | 0.3  | 541    | 0.4  |
| 111 to 119 | 0      | 79,688  | 82.9 | 49,739 | 51.7 | 29,578 | 30.8 | 21,102 | 21.9 | 18,427 | 19.2 | 17,830 | 18.5 |
|            | 1      | 12,584  | 13.1 | 21,820 | 22.7 | 17,315 | 18.0 | 13,441 | 14.0 | 12,171 | 12.7 | 11,946 | 12.4 |
|            | 2      | 3,644   | 3.8  | 20,348 | 21.2 | 35,204 | 36.6 | 39,228 | 40.8 | 40,007 | 41.6 | 40,063 | 41.7 |
|            | 3      | 257     | 0.3  | 3,826  | 4.0  | 11,855 | 12.3 | 17,910 | 18.6 | 19,778 | 20.6 | 20,032 | 20.8 |
|            | 4      | 8       | 0.0  | 403    | 0.4  | 1,874  | 2.0  | 3,622  | 3.8  | 4,523  | 4.7  | 4,840  | 5.0  |
|            | 5      | 0       | 0.0  | 40     | 0.0  | 293    | 0.3  | 676    | 0.7  | 960    | 1.0  | 1,084  | 1.1  |
|            | 6+     | 0       | 0.0  | 5      | 0.0  | 62     | 0.1  | 202    | 0.2  | 315    | 0.3  | 386    | 0.4  |
| 119 to 126 | 0      | 50,032  | 86.1 | 32,065 | 55.2 | 18,934 | 32.6 | 13,296 | 22.9 | 11,358 | 19.5 | 10,927 | 18.8 |
|            | 1      | 6,262   | 10.8 | 12,668 | 21.8 | 10,239 | 17.6 | 7,736  | 13.3 | 7,017  | 12.1 | 6,869  | 11.8 |
|            | 2      | 1,701   | 2.9  | 11,103 | 19.1 | 20,507 | 35.3 | 23,238 | 40.0 | 23,857 | 41.0 | 23,910 | 41.1 |
|            | 3      | 137     | 0.2  | 2,043  | 3.5  | 7,105  | 12.2 | 11,062 | 19.0 | 12,244 | 21.1 | 12,476 | 21.5 |
|            | 4      | 9       | 0.0  | 232    | 0.4  | 1,166  | 2.0  | 2,304  | 4.0  | 2,914  | 5.0  | 3,087  | 5.3  |
|            | 5      | 0       | 0.0  | 25     | 0.0  | 147    | 0.3  | 391    | 0.7  | 569    | 1.0  | 650    | 1.1  |
|            | 6+     | 0       | 0.0  | 5      | 0.0  | 43     | 0.1  | 114    | 0.2  | 182    | 0.3  | 222    | 0.4  |
| Above 126  | 0      | 27,866  | 89.7 | 18,698 | 60.2 | 11,005 | 35.4 | 7,522  | 24.2 | 6,376  | 20.5 | 6,138  | 19.8 |
|            | 1      | 2,560   | 8.2  | 6,342  | 20.4 | 5,450  | 17.5 | 4,079  | 13.1 | 3,607  | 11.6 | 3,504  | 11.3 |
|            | 2      | 608     | 2.0  | 5,031  | 16.2 | 10,382 | 33.4 | 12,022 | 38.7 | 12,436 | 40.0 | 12,496 | 40.2 |
|            | 3      | 44      | 0.1  | 891    | 2.9  | 3,620  | 11.7 | 6,009  | 19.3 | 6,736  | 21.7 | 6,863  | 22.1 |
|            | 4      | 3       | 0.0  | 108    | 0.4  | 516    | 1.7  | 1,197  | 3.9  | 1,534  | 4.9  | 1,614  | 5.2  |
|            | 5      | 1       | 0.0  | 11     | 0.0  | 91     | 0.3  | 187    | 0.6  | 296    | 1.0  | 351    | 1.1  |
|            | 6+     | 0       | 0.0  | 1      | 0.0  | 18     | 0.1  | 66     | 0.2  | 97     | 0.3  | 116    | 0.4  |
| Not Tested | 0      | 14,286  | 85.2 | 11,847 | 70.7 | 10,321 | 61.6 | 9,664  | 57.6 | 9,425  | 56.2 | 9,337  | 55.7 |
|            | 1      | 1,862   | 11.1 | 2,380  | 14.2 | 2,075  | 12.4 | 1,850  | 11.0 | 1,789  | 10.7 | 1,791  | 10.7 |
|            | 2      | 543     | 3.2  | 1,988  | 11.9 | 2,863  | 17.1 | 3,116  | 18.6 | 3,182  | 19.0 | 3,196  | 19.1 |
|            | 3      | 64      | 0.4  | 445    | 2.7  | 1,142  | 6.8  | 1,487  | 8.9  | 1,592  | 9.5  | 1,610  | 9.6  |
|            | 4      | 14      | 0.1  | 90     | 0.5  | 285    | 1.7  | 472    | 2.8  | 538    | 3.2  | 570    | 3.4  |
|            | 5      | 0       | 0.0  | 15     | 0.1  | 60     | 0.4  | 135    | 0.8  | 175    | 1.0  | 186    | 1.1  |
|            | 6+     | 0       | 0.0  | 4      | 0.0  | 23     | 0.1  | 45     | 0.3  | 68     | 0.4  | 79     | 0.5  |
| Missing    | 0      | 18,894  | 78.8 | 13,002 | 54.3 | 9,557  | 39.9 | 8,018  | 33.5 | 7,484  | 31.2 | 7,398  | 30.9 |
|            | 1      | 3,602   | 15.0 | 4,738  | 19.8 | 4,011  | 16.7 | 3,373  | 14.1 | 3,179  | 13.3 | 3,111  | 13.0 |
|            | 2      | 1,313   | 5.5  | 4,863  | 20.3 | 7,125  | 29.7 | 7,896  | 32.9 | 8,003  | 33.4 | 8,025  | 33.5 |
|            | 3      | 149     | 0.6  | 1,161  | 4.8  | 2,614  | 10.9 | 3,524  | 14.7 | 3,839  | 16.0 | 3,871  | 16.2 |
|            | 4      | 9       | 0.0  | 174    | 0.7  | 530    | 2.2  | 883    | 3.7  | 1,090  | 4.6  | 1,150  | 4.8  |
|            | 5      | 1       | 0.0  | 25     | 0.1  | 96     | 0.4  | 211    | 0.9  | 267    | 1.1  | 293    | 1.2  |
|            | 6+     | 0       | 0.0  | 5      | 0.0  | 35     | 0.2  | 63     | 0.3  | 106    | 0.4  | 120    | 0.5  |

TABLE S8. Linear regression: final parity regressed on IQ (continuous), no fixed effects. Swedish men born 1951-1967.

| Variable           | Category                      | Model 1 |         |               | Model 2 |               |               |
|--------------------|-------------------------------|---------|---------|---------------|---------|---------------|---------------|
|                    |                               | $\beta$ | SE      | 95% CI        | $\beta$ | SE            | 95% CI        |
| IQ (stanine scale) |                               | 0.034   | 0.001   | 0.032, 0.04   | 0.041   | 0.001         | 0.040, 0.04   |
| Birth Year         | 1951                          | 0.123   | 0.008   | 0.107, 0.14   | 0.105   | 0.008         | 0.089, 0.12   |
|                    | 1952                          | 0.122   | 0.008   | 0.106, 0.14   | 0.102   | 0.008         | 0.086, 0.12   |
|                    | 1953                          | 0.123   | 0.008   | 0.107, 0.14   | 0.104   | 0.008         | 0.088, 0.12   |
|                    | 1954                          | 0.128   | 0.008   | 0.111, 0.14   | 0.107   | 0.008         | 0.091, 0.12   |
|                    | 1955                          | 0.121   | 0.008   | 0.105, 0.14   | 0.101   | 0.008         | 0.085, 0.12   |
|                    | 1956                          | 0.122   | 0.008   | 0.106, 0.14   | 0.101   | 0.008         | 0.085, 0.12   |
|                    | 1957                          | 0.117   | 0.008   | 0.101, 0.13   | 0.097   | 0.008         | 0.081, 0.11   |
|                    | 1958                          | 0.093   | 0.008   | 0.077, 0.11   | 0.075   | 0.008         | 0.059, 0.09   |
|                    | 1959                          | 0.086   | 0.008   | 0.070, 0.10   | 0.067   | 0.008         | 0.050, 0.08   |
|                    | 1961                          | 0.037   | 0.008   | 0.021, 0.05   | 0.025   | 0.008         | 0.009, 0.04   |
|                    | 1962                          | 0.038   | 0.008   | 0.022, 0.05   | 0.028   | 0.008         | 0.012, 0.04   |
|                    | 1963                          | 0.024   | 0.008   | 0.009, 0.04   | 0.018   | 0.008         | 0.003, 0.03   |
|                    | 1964                          | 0.025   | 0.008   | 0.010, 0.04   | 0.023   | 0.008         | 0.008, 0.04   |
|                    | 1965 (ref)                    |         | 0.000   |               | 0.000   |               |               |
| 1966               |                               | -0.035  | 0.008   | -0.049, -0.02 | -0.031  | 0.007         | -0.045, -0.02 |
| 1967               |                               | -0.046  | 0.008   | -0.061, -0.03 | -0.040  | 0.008         | -0.055, -0.03 |
| Education          | Primary (<9 years)            |         |         |               | -0.032  | 0.013         | -0.058, -0.01 |
|                    | Primary (9 years)             |         |         |               | -0.004  | 0.005         | -0.014, 0.01  |
|                    | Secondary (10-11 years) (ref) |         |         |               | 0.000   |               |               |
|                    | Secondary (12 years)          |         |         |               | -0.084  | 0.005         | -0.093, -0.07 |
|                    | Tertiary (13-15 years)        |         |         |               | -0.052  | 0.005         | -0.061, -0.04 |
|                    | Tertiary (15+ years)          |         |         |               | -0.021  | 0.005         | -0.030, -0.01 |
|                    | Post-graduate                 |         |         |               | 0.047   | 0.013         | 0.022, 0.07   |
| Missing            |                               |         |         | -0.333        | 0.056   | -0.443, -0.22 |               |
| Family Size        | 1                             |         |         |               | -0.109  | 0.005         | -0.118, -0.10 |
|                    | 2 (ref)                       |         |         |               | 0.000   |               |               |
|                    | 3                             |         |         |               | 0.113   | 0.004         | 0.105, 0.12   |
|                    | 4                             |         |         |               | 0.206   | 0.006         | 0.194, 0.22   |
|                    | 5                             |         |         |               | 0.290   | 0.010         | 0.271, 0.31   |
|                    | 6                             |         |         |               | 0.375   | 0.014         | 0.347, 0.40   |
| Birth Order        | 1 (ref)                       |         |         |               | 0.000   |               |               |
|                    | 2                             |         |         |               | -0.027  | 0.004         | -0.034, -0.02 |
|                    | 3                             |         |         |               | -0.068  | 0.005         | -0.078, -0.06 |
|                    | 4                             |         |         |               | -0.117  | 0.009         | -0.134, -0.10 |
|                    | 5                             |         |         |               | -0.181  | 0.014         | -0.209, -0.15 |
|                    | 6                             |         |         |               | -0.147  | 0.019         | -0.185, -0.11 |
| N                  |                               |         | 712,265 |               |         | 712,265       |               |

TABLE S9. Linear regression: final parity regressed on IQ (continuous), fixed effects. Swedish men born 1951-1967.

| Variable           | Category                      | Model 1 |                |               | Model 2 |                |                |
|--------------------|-------------------------------|---------|----------------|---------------|---------|----------------|----------------|
|                    |                               | $\beta$ | SE             | 95% CI        | $\beta$ | SE             | 95% CI         |
| IQ (stanine scale) |                               | 0.075   | 0.003          | 0.069, 0.081  | 0.074   | 0.003          | 0.067, 0.080   |
| Birth Year         | 1951                          | 0.279   | 0.028          | 0.224, 0.333  | 0.294   | 0.042          | 0.211, 0.377   |
|                    | 1952                          | 0.286   | 0.027          | 0.233, 0.339  | 0.298   | 0.040          | 0.220, 0.376   |
|                    | 1953                          | 0.308   | 0.026          | 0.257, 0.360  | 0.320   | 0.037          | 0.247, 0.393   |
|                    | 1954                          | 0.274   | 0.025          | 0.224, 0.324  | 0.286   | 0.035          | 0.217, 0.355   |
|                    | 1955                          | 0.286   | 0.025          | 0.237, 0.335  | 0.296   | 0.033          | 0.231, 0.360   |
|                    | 1956                          | 0.253   | 0.024          | 0.206, 0.301  | 0.262   | 0.031          | 0.201, 0.323   |
|                    | 1957                          | 0.266   | 0.024          | 0.219, 0.313  | 0.275   | 0.029          | 0.217, 0.332   |
|                    | 1958                          | 0.226   | 0.023          | 0.180, 0.272  | 0.233   | 0.028          | 0.178, 0.288   |
|                    | 1959                          | 0.189   | 0.023          | 0.143, 0.235  | 0.196   | 0.027          | 0.143, 0.248   |
|                    | 1961                          | 0.106   | 0.023          | 0.060, 0.151  | 0.110   | 0.025          | 0.061, 0.159   |
|                    | 1962                          | 0.122   | 0.022          | 0.079, 0.165  | 0.126   | 0.023          | 0.080, 0.172   |
|                    | 1963                          | 0.074   | 0.022          | 0.031, 0.118  | 0.077   | 0.023          | 0.032, 0.121   |
|                    | 1964                          | 0.084   | 0.023          | 0.039, 0.130  | 0.086   | 0.023          | 0.040, 0.131   |
|                    | 1965 (ref)                    | 0.000   |                |               | 0.000   |                |                |
|                    | 1966                          | -0.048  | 0.024          | -0.096, 0.000 | -0.050  | 0.025          | -0.098, -0.001 |
| 1967               | -0.068                        | 0.024   | -0.115, -0.021 | -0.071        | 0.025   | -0.120, -0.023 |                |
| Education          | Primary (<9 years)            |         |                |               | -0.013  | 0.038          | -0.087, 0.061  |
|                    | Primary (9 years)             |         |                |               | -0.031  | 0.014          | -0.058, -0.004 |
|                    | Secondary (10-11 years) (ref) |         |                |               | 0.000   |                |                |
|                    | Secondary (12 years)          |         |                |               | -0.058  | 0.015          | -0.088, -0.028 |
|                    | Tertiary (13-15 years)        |         |                |               | -0.044  | 0.015          | -0.073, -0.015 |
|                    | Tertiary (15+ years)          |         |                |               | 0.038   | 0.017          | 0.005, 0.071   |
|                    | Post-graduate                 |         |                |               | 0.184   | 0.041          | 0.103, 0.264   |
| Missing            |                               |         |                | -0.446        | 0.140   | -0.720, -0.171 |                |
| Birth Order        |                               |         |                | 0.003         | 0.009   | -0.015, 0.022  |                |
| N                  |                               |         | 195,499        |               |         | 195,499        |                |



TABLE S10. Linear regression: final parity regressed on IQ (categorical), no fixed effects. Swedish men born 1951-1967.

| Variable    | Category                      | Model 1 |                |                | Model 2 |                |                |
|-------------|-------------------------------|---------|----------------|----------------|---------|----------------|----------------|
|             |                               | $\beta$ | SE             | 95% CI         | $\beta$ | SE             | 95% CI         |
| IQ          | Below 74                      | -0.444  | 0.011          | -0.464, -0.423 | -0.466  | 0.011          | -0.487, -0.445 |
|             | 74 to 81                      | -0.173  | 0.007          | -0.187, -0.160 | -0.189  | 0.007          | -0.203, -0.175 |
|             | 81 to 89                      | -0.073  | 0.006          | -0.084, -0.061 | -0.083  | 0.006          | -0.094, -0.072 |
|             | 89 to 96                      | -0.035  | 0.005          | -0.045, -0.026 | -0.040  | 0.005          | -0.049, -0.030 |
|             | 96 to 104 (ref)               | 0.000   |                |                | 0.000   |                |                |
|             | 104 to 111                    | 0.005   | 0.005          | -0.004, 0.014  | 0.007   | 0.005          | -0.002, 0.016  |
|             | 111 to 119                    | 0.011   | 0.005          | 0.001, 0.021   | 0.012   | 0.005          | 0.002, 0.022   |
|             | 119 to 126                    | 0.023   | 0.006          | 0.012, 0.035   | 0.018   | 0.006          | 0.006, 0.030   |
|             | Above 126                     | 0.019   | 0.008          | 0.003, 0.034   | 0.000   | 0.008          | -0.016, 0.016  |
|             | Not Tested                    | -0.881  | 0.011          | -0.903, -0.859 | -0.832  | 0.011          | -0.854, -0.810 |
| Missing     | -0.212                        | 0.010   | -0.231, -0.193 | -0.205         | 0.010   | -0.223, -0.186 |                |
| Birth Year  | 1951                          | 0.148   | 0.008          | 0.132, 0.164   | 0.136   | 0.008          | 0.120, 0.152   |
|             | 1952                          | 0.146   | 0.008          | 0.131, 0.162   | 0.131   | 0.008          | 0.115, 0.147   |
|             | 1953                          | 0.143   | 0.008          | 0.127, 0.159   | 0.126   | 0.008          | 0.110, 0.142   |
|             | 1954                          | 0.143   | 0.008          | 0.127, 0.159   | 0.125   | 0.008          | 0.109, 0.141   |
|             | 1955                          | 0.137   | 0.008          | 0.121, 0.153   | 0.120   | 0.008          | 0.104, 0.135   |
|             | 1956                          | 0.135   | 0.008          | 0.119, 0.151   | 0.117   | 0.008          | 0.101, 0.132   |
|             | 1957                          | 0.131   | 0.008          | 0.115, 0.146   | 0.113   | 0.008          | 0.097, 0.128   |
|             | 1958                          | 0.108   | 0.008          | 0.092, 0.123   | 0.091   | 0.008          | 0.075, 0.106   |
|             | 1959                          | 0.095   | 0.008          | 0.079, 0.111   | 0.077   | 0.008          | 0.061, 0.093   |
|             | 1961                          | 0.072   | 0.008          | 0.056, 0.087   | 0.058   | 0.008          | 0.043, 0.074   |
|             | 1962                          | 0.042   | 0.008          | 0.027, 0.058   | 0.032   | 0.008          | 0.016, 0.047   |
|             | 1963                          | 0.031   | 0.008          | 0.016, 0.046   | 0.024   | 0.008          | 0.009, 0.039   |
|             | 1964                          | 0.037   | 0.007          | 0.022, 0.051   | 0.034   | 0.007          | 0.020, 0.049   |
|             | 1965 (ref)                    | 0.000   |                |                | 0.000   |                |                |
| 1966        | -0.033                        | 0.007   | -0.048, -0.019 | -0.030         | 0.007   | -0.044, -0.015 |                |
| 1967        | -0.042                        | 0.007   | -0.056, -0.027 | -0.037         | 0.007   | -0.052, -0.023 |                |
| Education   | Primary (<9 years)            |         |                |                | -0.095  | 0.012          | -0.120, -0.071 |
|             | Primary (9 years)             |         |                |                | -0.022  | 0.005          | -0.031, -0.013 |
|             | Secondary (10-11 years) (ref) |         |                |                | 0.000   |                |                |
|             | Secondary (12 years)          |         |                |                | -0.072  | 0.005          | -0.081, -0.063 |
|             | Tertiary (13-15 years)        |         |                |                | -0.023  | 0.004          | -0.032, -0.014 |
|             | Tertiary (15+ years)          |         |                |                | 0.022   | 0.005          | 0.013, 0.031   |
|             | Post-graduate                 |         |                |                | 0.125   | 0.012          | 0.100, 0.149   |
| Missing     |                               |         |                | -0.858         | 0.025   | -0.907, -0.809 |                |
| Family Size | 1                             |         |                |                | -0.109  | 0.005          | -0.118, -0.100 |
|             | 2 (ref)                       |         |                |                | 0.000   |                |                |
|             | 3                             |         |                |                | 0.115   | 0.004          | 0.107, 0.123   |
|             | 4                             |         |                |                | 0.209   | 0.006          | 0.197, 0.221   |
|             | 5                             |         |                |                | 0.295   | 0.010          | 0.276, 0.315   |
|             | 6                             |         |                |                | 0.392   | 0.014          | 0.365, 0.420   |
| Birth Order | 1 (ref)                       |         |                |                | 0.000   |                |                |
|             | 2                             |         |                |                | -0.028  | 0.004          | -0.035, -0.021 |
|             | 3                             |         |                |                | -0.070  | 0.005          | -0.080, -0.060 |
|             | 4                             |         |                |                | -0.121  | 0.009          | -0.138, -0.104 |
|             | 5                             |         |                |                | -0.183  | 0.014          | -0.211, -0.156 |
|             | 6                             |         |                |                | -0.161  | 0.019          | -0.198, -0.123 |
| N           |                               |         | 749,939        |                |         | 749,939        |                |

TABLE S11. Linear regression: final parity regressed on IQ (categorical), fixed effects. Swedish men born 1951-1967.

| Variable                      | Category        | Model 1            |         |                | Model 2 |                |                |
|-------------------------------|-----------------|--------------------|---------|----------------|---------|----------------|----------------|
|                               |                 | $\beta$            | SE      | 95% CI         | $\beta$ | SE             | 95% CI         |
| IQ                            | Below 74        | -0.584             | 0.029   | -0.641, -0.527 | -0.564  | 0.029          | -0.622, -0.507 |
|                               | 74 to 81        | -0.295             | 0.020   | -0.334, -0.256 | -0.282  | 0.020          | -0.321, -0.242 |
|                               | 81 to 89        | -0.127             | 0.016   | -0.159, -0.095 | -0.118  | 0.016          | -0.151, -0.086 |
|                               | 89 to 96        | -0.062             | 0.014   | -0.090, -0.034 | -0.057  | 0.014          | -0.085, -0.029 |
|                               | 96 to 104 (ref) | 0.000              |         |                | 0.000   |                |                |
|                               | 104 to 111      | 0.029              | 0.014   | 0.002, 0.056   | 0.022   | 0.014          | -0.005, 0.049  |
|                               | 111 to 119      | 0.076              | 0.016   | 0.045, 0.107   | 0.059   | 0.016          | 0.028, 0.091   |
|                               | 119 to 126      | 0.121              | 0.019   | 0.083, 0.159   | 0.093   | 0.020          | 0.054, 0.132   |
|                               | Above 126       | 0.140              | 0.026   | 0.089, 0.190   | 0.094   | 0.026          | 0.042, 0.146   |
|                               | Not Tested      | -1.044             | 0.032   | -1.106, -0.982 | -0.979  | 0.032          | -1.042, -0.916 |
|                               | Missing         | -0.264             | 0.029   | -0.321, -0.206 | -0.256  | 0.029          | -0.313, -0.198 |
| Birth Year                    | 1951            | 0.317              | 0.027   | 0.265, 0.370   | 0.333   | 0.041          | 0.254, 0.413   |
|                               | 1952            | 0.316              | 0.026   | 0.265, 0.367   | 0.328   | 0.038          | 0.253, 0.403   |
|                               | 1953            | 0.330              | 0.025   | 0.281, 0.380   | 0.339   | 0.036          | 0.269, 0.409   |
|                               | 1954            | 0.296              | 0.025   | 0.248, 0.344   | 0.307   | 0.034          | 0.241, 0.373   |
|                               | 1955            | 0.308              | 0.024   | 0.261, 0.355   | 0.316   | 0.032          | 0.254, 0.378   |
|                               | 1956            | 0.278              | 0.023   | 0.232, 0.324   | 0.284   | 0.030          | 0.225, 0.343   |
|                               | 1957            | 0.281              | 0.023   | 0.236, 0.326   | 0.287   | 0.028          | 0.232, 0.343   |
|                               | 1958            | 0.240              | 0.023   | 0.196, 0.284   | 0.245   | 0.027          | 0.193, 0.298   |
|                               | 1959            | 0.196              | 0.023   | 0.152, 0.240   | 0.201   | 0.026          | 0.150, 0.252   |
|                               | 1961            | 0.158              | 0.022   | 0.115, 0.200   | 0.158   | 0.023          | 0.112, 0.204   |
|                               | 1962            | 0.122              | 0.021   | 0.080, 0.164   | 0.123   | 0.023          | 0.079, 0.167   |
|                               | 1963            | 0.085              | 0.021   | 0.043, 0.126   | 0.084   | 0.022          | 0.042, 0.127   |
|                               | 1964            | 0.093              | 0.022   | 0.049, 0.136   | 0.092   | 0.022          | 0.048, 0.136   |
|                               | 1965 (ref)      | 0.000              |         |                | 0.000   | 0.000          |                |
|                               | 1966            | -0.040             | 0.023   | -0.086, 0.006  | -0.043  | 0.024          | -0.089, 0.004  |
|                               | 1967            | -0.067             | 0.023   | -0.112, -0.022 | -0.070  | 0.023          | -0.116, -0.024 |
|                               | Education       | Primary (<9 years) |         |                |         | -0.125         | 0.035          |
| Primary (9 years)             |                 |                    |         |                | -0.061  | 0.013          | -0.087, -0.035 |
| Secondary (10-11 years) (ref) |                 |                    |         |                | 0.000   |                |                |
| Secondary (12 years)          |                 |                    |         |                | -0.032  | 0.015          | -0.061, -0.003 |
| Tertiary (13-15 years)        |                 |                    |         |                | -0.003  | 0.014          | -0.031, 0.025  |
| Tertiary (15+ years)          |                 |                    |         |                | 0.094   | 0.016          | 0.063, 0.126   |
| Post-graduate                 |                 |                    |         |                | 0.277   | 0.039          | 0.200, 0.354   |
| Missing                       |                 |                    |         | -0.921         | 0.077   | -1.072, -0.770 |                |
| Birth Order                   |                 |                    |         | 0.001          | 0.009   | -0.017, 0.019  |                |
| N                             |                 |                    | 205,685 |                |         | 205,685        |                |

TABLE S12. Mean IQ (stanine scale) by parity and educational attainment in 2012 for Swedish men born 1951-1967.

| Parity | Education |      |      |        |      |      |         |      |      |        |      |      |
|--------|-----------|------|------|--------|------|------|---------|------|------|--------|------|------|
|        | Everyone  |      |      | Low    |      |      | Medium  |      |      | High   |      |      |
|        | N         | Mean | SD   | N      | Mean | SD   | N       | Mean | SD   | N      | Mean | SD   |
| 0      | 149,877   | 4.90 | 2.06 | 28,078 | 3.55 | 1.81 | 79,296  | 4.57 | 1.84 | 42,243 | 6.41 | 1.67 |
| 1      | 101,906   | 4.97 | 1.91 | 18,337 | 3.83 | 1.69 | 56,189  | 4.68 | 1.72 | 27,264 | 6.35 | 1.63 |
| 2      | 288,622   | 5.29 | 1.86 | 44,063 | 4.06 | 1.66 | 148,741 | 4.87 | 1.65 | 95,649 | 6.51 | 1.56 |
| 3      | 143,560   | 5.31 | 1.90 | 24,111 | 4.06 | 1.66 | 72,112  | 4.88 | 1.68 | 47,236 | 6.60 | 1.58 |
| 4      | 40,069    | 5.10 | 1.93 | 7,932  | 3.99 | 1.72 | 20,974  | 4.75 | 1.72 | 11,122 | 6.54 | 1.60 |
| 5      | 10,298    | 4.89 | 1.96 | 2,364  | 3.92 | 1.74 | 5,561   | 4.62 | 1.75 | 2,361  | 6.52 | 1.64 |
| 6+     | 4,077     | 4.64 | 2.03 | 1,060  | 3.67 | 1.80 | 2,203   | 4.40 | 1.81 | 808    | 6.55 | 1.62 |

TABLE S13. Linear regression: parity progression regressed on IQ (categorical), no fixed effects. Swedish men born 1951-1967.

| Variable    | Category                      | Model 1 |      |                |         |      | Model 2        |         |      |                |         | Model 1 |                |         |      |                | Model 2 |      |                |         |      |                |       |      |                |
|-------------|-------------------------------|---------|------|----------------|---------|------|----------------|---------|------|----------------|---------|---------|----------------|---------|------|----------------|---------|------|----------------|---------|------|----------------|-------|------|----------------|
|             |                               | $\beta$ | SE   | 95% CI         | $\beta$ | SE   | 95% CI         | $\beta$ | SE   | 95% CI         | $\beta$ | SE      | 95% CI         | $\beta$ | SE   | 95% CI         | $\beta$ | SE   | 95% CI         | $\beta$ | SE   | 95% CI         |       |      |                |
| IQ          | Below 74                      | 0.20    | 0.00 | 0.192, 0.205   | 0.19    | 0.00 | 0.186, 0.200   | -0.08   | 0.00 | -0.086, -0.070 | -0.08   | 0.00    | -0.085, -0.069 | 0.06    | 0.01 | 0.046, 0.067   | 0.03    | 0.01 | 0.019, 0.040   | 0.03    | 0.01 | 0.046, 0.067   | 0.03  | 0.01 | 0.019, 0.040   |
|             | 74 to 81                      | 0.08    | 0.00 | 0.079, 0.088   | 0.08    | 0.00 | 0.076, 0.085   | -0.04   | 0.00 | -0.047, -0.037 | -0.04   | 0.00    | -0.045, -0.035 | 0.04    | 0.00 | 0.035, 0.048   | 0.02    | 0.00 | 0.016, 0.029   | 0.02    | 0.00 | 0.035, 0.048   | 0.02  | 0.00 | 0.016, 0.029   |
|             | 81 to 89                      | 0.03    | 0.00 | 0.030, 0.037   | 0.03    | 0.00 | 0.028, 0.035   | -0.03   | 0.00 | -0.030, -0.023 | -0.02   | 0.00    | -0.028, -0.020 | 0.02    | 0.00 | 0.014, 0.025   | 0.01    | 0.00 | 0.002, 0.013   | 0.01    | 0.00 | 0.014, 0.025   | 0.01  | 0.00 | 0.002, 0.013   |
|             | 89 to 96                      | 0.01    | 0.00 | 0.012, 0.018   | 0.01    | 0.00 | 0.010, 0.016   | -0.01   | 0.00 | -0.016, -0.009 | -0.01   | 0.00    | -0.014, -0.008 | 0.01    | 0.00 | 0.004, 0.014   | 0.00    | 0.00 | -0.002, 0.007  | 0.00    | 0.00 | 0.004, 0.014   | 0.00  | 0.00 | -0.002, 0.007  |
|             | 96 to 104 (ref)               | 0.00    |      |                | 0.00    |      |                | 0.00    |      |                | 0.00    |         |                | 0.00    |      |                | 0.00    |      |                | 0.00    |      |                | 0.00  |      |                |
|             | 104 to 111                    | 0.00    | 0.00 | -0.005, 0.001  | 0.00    | 0.00 | -0.003, 0.002  | 0.01    | 0.00 | 0.007, 0.013   | 0.01    | 0.00    | 0.004, 0.010   | -0.01   | 0.00 | -0.010, -0.002 | 0.00    | 0.00 | -0.004, 0.004  | 0.00    | 0.00 | -0.010, -0.002 | 0.00  | 0.00 | -0.004, 0.004  |
|             | 111 to 119                    | 0.00    | 0.00 | -0.004, 0.003  | 0.00    | 0.00 | 0.000, 0.006   | 0.02    | 0.00 | 0.017, 0.024   | 0.01    | 0.00    | 0.010, 0.016   | 0.00    | 0.00 | -0.007, 0.003  | 0.01    | 0.00 | 0.003, 0.013   | 0.01    | 0.00 | -0.007, 0.003  | 0.01  | 0.00 | 0.003, 0.013   |
|             | 119 to 126                    | 0.00    | 0.00 | -0.002, 0.006  | 0.01    | 0.00 | 0.004, 0.012   | 0.03    | 0.00 | 0.023, 0.031   | 0.02    | 0.00    | 0.011, 0.019   | 0.01    | 0.00 | 0.004, 0.015   | 0.02    | 0.00 | 0.015, 0.027   | 0.02    | 0.00 | 0.004, 0.015   | 0.02  | 0.00 | 0.015, 0.027   |
|             | Above 126                     | 0.01    | 0.00 | 0.006, 0.016   | 0.02    | 0.00 | 0.015, 0.025   | 0.03    | 0.00 | 0.028, 0.038   | 0.02    | 0.00    | 0.011, 0.021   | 0.02    | 0.00 | 0.013, 0.027   | 0.03    | 0.00 | 0.021, 0.036   | 0.03    | 0.00 | 0.013, 0.027   | 0.03  | 0.00 | 0.021, 0.036   |
|             | Not Tested                    | 0.37    | 0.00 | 0.365, 0.381   | 0.35    | 0.00 | 0.340, 0.356   | -0.07   | 0.01 | -0.080, -0.060 | -0.07   | 0.01    | -0.081, -0.060 | 0.02    | 0.01 | 0.006, 0.034   | 0.02    | 0.01 | 0.003, 0.031   | 0.02    | 0.01 | 0.006, 0.034   | 0.02  | 0.01 | 0.003, 0.031   |
| Birth Year  | Missing                       | 0.10    | 0.00 | 0.096, 0.109   | 0.10    | 0.00 | 0.090, 0.103   | -0.01   | 0.00 | -0.018, -0.005 | -0.01   | 0.00    | -0.021, -0.007 | 0.02    | 0.00 | 0.012, 0.031   | 0.02    | 0.00 | 0.012, 0.030   | 0.02    | 0.00 | 0.012, 0.031   | 0.02  | 0.00 | 0.012, 0.030   |
|             | 1951                          | -0.02   | 0.00 | -0.029, -0.019 | -0.03   | 0.00 | -0.033, -0.023 | 0.01    | 0.00 | 0.001, 0.011   | 0.00    | 0.00    | -0.001, 0.010  | 0.07    | 0.00 | 0.067, 0.082   | 0.06    | 0.00 | 0.053, 0.069   | 0.06    | 0.00 | 0.067, 0.082   | 0.06  | 0.00 | 0.053, 0.069   |
|             | 1952                          | -0.02   | 0.00 | -0.029, -0.019 | -0.03   | 0.00 | -0.031, -0.021 | 0.00    | 0.00 | -0.001, 0.010  | 0.00    | 0.00    | -0.003, 0.008  | 0.08    | 0.00 | 0.072, 0.087   | 0.07    | 0.00 | 0.058, 0.074   | 0.07    | 0.00 | 0.072, 0.087   | 0.07  | 0.00 | 0.058, 0.074   |
|             | 1953                          | -0.02   | 0.00 | -0.027, -0.016 | -0.02   | 0.00 | -0.028, -0.018 | 0.01    | 0.00 | 0.006, 0.017   | 0.01    | 0.00    | 0.004, 0.014   | 0.07    | 0.00 | 0.063, 0.078   | 0.06    | 0.00 | 0.051, 0.066   | 0.06    | 0.00 | 0.063, 0.078   | 0.06  | 0.00 | 0.051, 0.066   |
|             | 1954                          | -0.02   | 0.00 | -0.026, -0.015 | -0.02   | 0.00 | -0.026, -0.016 | 0.01    | 0.00 | 0.005, 0.016   | 0.01    | 0.00    | 0.003, 0.014   | 0.08    | 0.00 | 0.072, 0.087   | 0.07    | 0.00 | 0.059, 0.075   | 0.07    | 0.00 | 0.072, 0.087   | 0.07  | 0.00 | 0.059, 0.075   |
|             | 1955                          | -0.02   | 0.00 | -0.021, -0.011 | -0.02   | 0.00 | -0.022, -0.011 | 0.01    | 0.00 | 0.004, 0.015   | 0.01    | 0.00    | 0.002, 0.012   | 0.09    | 0.00 | 0.077, 0.093   | 0.07    | 0.00 | 0.066, 0.081   | 0.07    | 0.00 | 0.077, 0.093   | 0.07  | 0.00 | 0.066, 0.081   |
|             | 1956                          | -0.01   | 0.00 | -0.019, -0.009 | -0.01   | 0.00 | -0.019, -0.009 | 0.02    | 0.00 | 0.010, 0.021   | 0.01    | 0.00    | 0.008, 0.019   | 0.08    | 0.00 | 0.072, 0.087   | 0.07    | 0.00 | 0.061, 0.076   | 0.07    | 0.00 | 0.072, 0.087   | 0.07  | 0.00 | 0.061, 0.076   |
|             | 1957                          | -0.01   | 0.00 | -0.018, -0.007 | -0.01   | 0.00 | -0.017, -0.007 | 0.02    | 0.00 | 0.013, 0.024   | 0.02    | 0.00    | 0.011, 0.022   | 0.07    | 0.00 | 0.066, 0.082   | 0.06    | 0.00 | 0.056, 0.071   | 0.06    | 0.00 | 0.066, 0.082   | 0.06  | 0.00 | 0.056, 0.071   |
|             | 1958                          | -0.01   | 0.00 | -0.016, -0.006 | -0.01   | 0.00 | -0.016, -0.005 | 0.02    | 0.00 | 0.012, 0.022   | 0.01    | 0.00    | 0.010, 0.020   | 0.06    | 0.00 | 0.054, 0.069   | 0.05    | 0.00 | 0.044, 0.059   | 0.05    | 0.00 | 0.054, 0.069   | 0.05  | 0.00 | 0.044, 0.059   |
|             | 1959                          | -0.01   | 0.00 | -0.015, -0.005 | -0.01   | 0.00 | -0.014, -0.004 | 0.01    | 0.00 | 0.006, 0.017   | 0.01    | 0.00    | 0.003, 0.014   | 0.06    | 0.00 | 0.050, 0.066   | 0.05    | 0.00 | 0.040, 0.056   | 0.05    | 0.00 | 0.050, 0.066   | 0.05  | 0.00 | 0.040, 0.056   |
| Education   | 1961                          | -0.01   | 0.00 | -0.015, -0.005 | -0.01   | 0.00 | -0.013, -0.003 | 0.01    | 0.00 | 0.002, 0.013   | 0.01    | 0.00    | 0.000, 0.011   | 0.04    | 0.00 | 0.029, 0.044   | 0.03    | 0.00 | 0.022, 0.038   | 0.03    | 0.00 | 0.029, 0.044   | 0.03  | 0.00 | 0.022, 0.038   |
|             | 1962                          | 0.00    | 0.00 | -0.006, 0.004  | 0.00    | 0.00 | -0.005, 0.005  | 0.01    | 0.00 | 0.000, 0.011   | 0.00    | 0.00    | -0.002, 0.009  | 0.03    | 0.00 | 0.026, 0.041   | 0.03    | 0.00 | 0.021, 0.036   | 0.03    | 0.00 | 0.026, 0.041   | 0.03  | 0.00 | 0.021, 0.036   |
|             | 1963                          | 0.00    | 0.00 | -0.008, 0.002  | 0.00    | 0.00 | -0.007, 0.003  | 0.01    | 0.00 | 0.001, 0.012   | 0.01    | 0.00    | 0.000, 0.011   | 0.02    | 0.00 | 0.011, 0.026   | 0.02    | 0.00 | 0.008, 0.023   | 0.02    | 0.00 | 0.011, 0.026   | 0.02  | 0.00 | 0.008, 0.023   |
|             | 1964                          | -0.01   | 0.00 | -0.014, -0.004 | -0.01   | 0.00 | -0.014, -0.004 | 0.00    | 0.00 | -0.003, 0.007  | 0.00    | 0.00    | -0.003, 0.007  | 0.01    | 0.00 | 0.006, 0.020   | 0.01    | 0.00 | 0.004, 0.019   | 0.01    | 0.00 | 0.006, 0.020   | 0.01  | 0.00 | 0.004, 0.019   |
|             | 1965 (ref)                    | 0.00    |      |                | 0.00    |      |                | 0.00    |      |                | 0.00    |         |                | 0.00    |      |                | 0.00    |      |                | 0.00    |      |                | 0.00  |      |                |
|             | 1966                          | 0.00    | 0.00 | -0.003, 0.007  | 0.00    | 0.00 | -0.003, 0.007  | -0.01   | 0.00 | -0.016, -0.005 | -0.01   | 0.00    | -0.015, -0.005 | -0.01   | 0.00 | -0.021, -0.007 | -0.01   | 0.00 | -0.020, -0.005 | -0.01   | 0.00 | -0.021, -0.007 | -0.01 | 0.00 | -0.020, -0.005 |
|             | 1967                          | 0.00    | 0.00 | -0.001, 0.008  | 0.00    | 0.00 | -0.001, 0.008  | -0.01   | 0.00 | -0.014, -0.004 | -0.01   | 0.00    | -0.014, -0.003 | -0.02   | 0.00 | -0.024, -0.010 | -0.01   | 0.00 | -0.021, -0.007 | -0.01   | 0.00 | -0.024, -0.010 | -0.01 | 0.00 | -0.021, -0.007 |
|             | Primary (<9 years)            | 0.05    | 0.00 | 0.044, 0.059   | 0.05    | 0.00 | 0.044, 0.059   | 0.00    | 0.00 | -0.014, -0.004 | 0.00    | 0.00    | -0.010, 0.006  | 0.02    | 0.01 | 0.010, 0.033   | 0.02    | 0.01 | 0.010, 0.033   | 0.02    | 0.01 | 0.010, 0.033   | 0.02  | 0.01 | 0.010, 0.033   |
|             | Primary (9 years)             | 0.02    | 0.00 | 0.016, 0.021   | 0.02    | 0.00 | 0.016, 0.021   | 0.00    | 0.00 | 0.016, 0.021   | 0.00    | 0.00    | -0.004, 0.002  | 0.01    | 0.00 | 0.010, 0.019   | 0.01    | 0.00 | 0.010, 0.019   | 0.01    | 0.00 | 0.010, 0.019   | 0.01  | 0.00 | 0.010, 0.019   |
|             | Secondary (10-11 years) (ref) | 0.00    |      |                | 0.00    |      |                | 0.00    |      |                | 0.00    |         |                | 0.00    |      |                | 0.00    |      |                | 0.00    |      |                | 0.00  |      |                |
| Family Size | Secondary (12 years)          | 0.02    | 0.00 | 0.015, 0.021   | 0.02    | 0.00 | 0.015, 0.021   | 0.00    | 0.00 | 0.015, 0.021   | 0.00    | 0.00    | -0.003, 0.003  | 0.02    | 0.00 | 0.012, 0.018   | 0.02    | 0.00 | 0.012, 0.018   | 0.02    | 0.00 | 0.012, 0.018   | 0.02  | 0.00 | 0.012, 0.018   |
|             | Tertiary (13-15 years)        | 0.00    | 0.00 | -0.007, -0.002 | 0.00    | 0.00 | -0.007, -0.002 | 0.02    | 0.00 | 0.012, 0.018   | 0.02    | 0.00    | 0.028, 0.034   | 0.03    | 0.00 | 0.029, 0.044   | 0.03    | 0.00 | 0.022, 0.038   | 0.03    | 0.00 | 0.029, 0.044   | 0.03  | 0.00 | 0.022, 0.038   |
|             | Tertiary (15+ years)          | -0.01   | 0.00 | -0.008, -0.002 | -0.01   | 0.00 | -0.008, -0.002 | 0.03    | 0.00 | 0.031, 0.046   | 0.04    | 0.00    | 0.031, 0.046   | 0.03    | 0.01 | 0.017, 0.041   | 0.03    | 0.01 | 0.017, 0.041   | 0.03    | 0.01 | 0.017, 0.041   | 0.03  | 0.01 | 0.017, 0.041   |
|             | Post-graduate                 | -0.03   | 0.00 | -0.036, -0.020 | -0.03   | 0.00 | -0.036, -0.020 | 0.04    | 0.00 | 0.031, 0.046   | 0.04    | 0.00    | 0.031, 0.046   | 0.03    | 0.01 | 0.017, 0.041   | 0.03    | 0.01 | 0.017, 0.041   | 0.03    | 0.01 | 0.017, 0.041   | 0.03  | 0.01 | 0.017, 0.041   |
|             | Missing                       | 0.37    | 0.01 | 0.353, 0.389   | 0.37    | 0.01 | 0.353, 0.389   | -0.08   | 0.02 | -0.122, -0.041 | -0.08   | 0.02    | -0.122, -0.041 | 0.03    | 0.03 | 0.022, 0.085   | 0.03    | 0.03 | 0.022, 0.085   | 0.03    | 0.03 | 0.022, 0.085   | 0.03  | 0.03 | 0.022, 0.085   |
|             | 1                             | 0.04    | 0.00 | 0.032, 0.038   | 0.04    | 0.00 | 0.032, 0.038   | 0.00    | 0.00 | -0.032, -0.025 | 0.00    | 0.00    | -0.032, -0.025 | 0.00    | 0.00 | 0.009, 0.000   | 0.00    | 0.00 | -0.009, 0.000  | 0.00    | 0.00 | 0.009, 0.000   | 0.00  | 0.00 | -0.009, 0.000  |
| Birth Order | 2 (ref)                       | 0.00    |      |                | 0.00    |      |                | 0.00    |      |                | 0.00    |         | 0.00           |         |      | 0.00           |         |      | 0.00           |         |      | 0.00           |       |      |                |
|             | 3                             | -0.02   | 0.00 | -0.023, -0.018 | -0.02   | 0.00 | -0.023, -0.018 | 0.02    | 0.00 | 0.014, 0.019   | 0.02    | 0.00    | 0.014, 0.019   | 0.05    | 0.00 | 0.042, 0.049   | 0.05    | 0.00 | 0.042, 0.049   | 0.05    | 0.00 | 0.042, 0.049   | 0.05  | 0.00 | 0.042, 0.049   |
|             | 4                             | -0.03   | 0.00 | -0.033, -0.025 | -0.03   | 0.00 | -0.033, -0.025 | 0.03    | 0.00 | 0.022, 0.030   | 0.03    | 0.00    | 0.022, 0.030   | 0.09    | 0.00 | 0.086, 0.097   | 0       |      |                |         |      |                |       |      |                |

TABLE S14. Linear regression: parity progression regressed on IQ (categorical), no fixed effects. Swedish men born 1951-1967.

| Variable    | Category                      | 3 → 4   |      |                |         |        |                | 4 → 5   |      |                |         |        |                | 5 → 6+  |      |               |         |        |               |  |
|-------------|-------------------------------|---------|------|----------------|---------|--------|----------------|---------|------|----------------|---------|--------|----------------|---------|------|---------------|---------|--------|---------------|--|
|             |                               | Model 1 |      |                | Model 2 |        |                | Model 1 |      |                | Model 2 |        |                | Model 1 |      |               | Model 2 |        |               |  |
|             |                               | β       | SE   | 95% CI         | β       | SE     | 95% CI         | β       | SE   | 95% CI         | β       | SE     | 95% CI         | β       | SE   | 95% CI        | β       | SE     | 95% CI        |  |
| IQ          | Below 74                      | 0.11    | 0.01 | 0.094, 0.124   | 0.08    | 0.01   | 0.069, 0.099   | 0.10    | 0.01 | 0.079, 0.127   | 0.08    | 0.01   | 0.057, 0.106   | 0.12    | 0.02 | 0.080, 0.164  | 0.10    | 0.02   | 0.059, 0.144  |  |
|             | 74 to 81                      | 0.06    | 0.00 | 0.052, 0.071   | 0.04    | 0.00   | 0.032, 0.051   | 0.06    | 0.01 | 0.040, 0.073   | 0.04    | 0.01   | 0.023, 0.056   | 0.07    | 0.02 | 0.039, 0.100  | 0.05    | 0.02   | 0.024, 0.086  |  |
|             | 81 to 89                      | 0.03    | 0.00 | 0.027, 0.042   | 0.02    | 0.00   | 0.013, 0.028   | 0.04    | 0.01 | 0.025, 0.054   | 0.03    | 0.01   | 0.013, 0.042   | 0.03    | 0.01 | 0.001, 0.055  | 0.02    | 0.01   | -0.008, 0.046 |  |
|             | 89 to 96                      | 0.01    | 0.00 | 0.006, 0.019   | 0.00    | 0.00   | -0.003, 0.011  | 0.01    | 0.01 | -0.005, 0.020  | 0.00    | 0.01   | -0.013, 0.012  | 0.02    | 0.01 | -0.009, 0.041 | 0.01    | 0.01   | -0.015, 0.035 |  |
|             | 96 to 104 (ref)               | 0.00    |      |                | 0.00    |        |                | 0.00    |      |                | 0.00    |        |                | 0.00    |      |               | 0.00    |        |               |  |
|             | 104 to 111                    | -0.02   | 0.00 | -0.022, -0.009 | -0.01   | 0.00   | -0.012, 0.000  | -0.01   | 0.01 | -0.022, 0.002  | 0.00    | 0.01   | -0.014, 0.010  | -0.01   | 0.01 | -0.037, 0.012 | -0.01   | 0.01   | -0.031, 0.018 |  |
|             | 111 to 119                    | -0.03   | 0.00 | -0.039, -0.025 | -0.01   | 0.00   | -0.020, -0.006 | -0.02   | 0.01 | -0.035, -0.008 | -0.01   | 0.01   | -0.019, 0.008  | -0.01   | 0.01 | -0.033, 0.023 | 0.00    | 0.01   | -0.025, 0.032 |  |
|             | 119 to 126                    | -0.03   | 0.00 | -0.038, -0.022 | 0.00    | 0.00   | -0.012, 0.005  | -0.03   | 0.01 | -0.047, -0.016 | -0.01   | 0.01   | -0.022, 0.011  | 0.00    | 0.02 | -0.038, 0.029 | 0.01    | 0.02   | -0.020, 0.049 |  |
|             | Above 126                     | -0.04   | 0.01 | -0.047, -0.027 | -0.01   | 0.01   | -0.016, 0.005  | -0.02   | 0.01 | -0.043, -0.003 | 0.01    | 0.01   | -0.012, 0.030  | -0.02   | 0.02 | -0.060, 0.024 | 0.00    | 0.02   | -0.042, 0.047 |  |
|             | Not Tested                    | 0.06    | 0.01 | 0.042, 0.082   | 0.06    | 0.01   | 0.039, 0.079   | 0.07    | 0.02 | 0.033, 0.099   | 0.06    | 0.02   | 0.028, 0.095   | 0.03    | 0.03 | -0.029, 0.088 | 0.02    | 0.03   | -0.036, 0.081 |  |
| Birth Year  | Missing                       | 0.02    | 0.01 | 0.007, 0.034   | 0.02    | 0.01   | 0.010, 0.037   | 0.02    | 0.01 | -0.006, 0.044  | 0.02    | 0.01   | -0.004, 0.045  | 0.02    | 0.03 | -0.034, 0.065 | 0.01    | 0.03   | -0.036, 0.063 |  |
|             | 1951                          | 0.03    | 0.01 | 0.023, 0.045   | 0.02    | 0.01   | 0.014, 0.036   | 0.05    | 0.01 | 0.033, 0.075   | 0.05    | 0.01   | 0.027, 0.069   | 0.04    | 0.02 | 0.000, 0.083  | 0.03    | 0.02   | -0.009, 0.074 |  |
|             | 1952                          | 0.03    | 0.01 | 0.024, 0.046   | 0.02    | 0.01   | 0.014, 0.036   | 0.03    | 0.01 | 0.011, 0.052   | 0.03    | 0.01   | 0.005, 0.046   | 0.03    | 0.02 | -0.013, 0.070 | 0.02    | 0.02   | -0.018, 0.065 |  |
|             | 1953                          | 0.04    | 0.01 | 0.027, 0.049   | 0.03    | 0.01   | 0.018, 0.040   | 0.03    | 0.01 | 0.006, 0.046   | 0.02    | 0.01   | 0.000, 0.040   | 0.04    | 0.02 | 0.003, 0.086  | 0.04    | 0.02   | -0.006, 0.077 |  |
|             | 1954                          | 0.03    | 0.01 | 0.014, 0.036   | 0.02    | 0.01   | 0.005, 0.027   | 0.03    | 0.01 | 0.009, 0.050   | 0.02    | 0.01   | 0.002, 0.044   | 0.03    | 0.02 | -0.013, 0.071 | 0.02    | 0.02   | -0.022, 0.062 |  |
|             | 1955                          | 0.03    | 0.01 | 0.016, 0.038   | 0.02    | 0.01   | 0.008, 0.030   | 0.04    | 0.01 | 0.015, 0.056   | 0.03    | 0.01   | 0.010, 0.051   | 0.02    | 0.02 | -0.023, 0.059 | 0.01    | 0.02   | -0.029, 0.052 |  |
|             | 1956                          | 0.03    | 0.01 | 0.018, 0.039   | 0.02    | 0.01   | 0.009, 0.031   | 0.03    | 0.01 | 0.006, 0.047   | 0.02    | 0.01   | 0.000, 0.041   | 0.02    | 0.02 | -0.019, 0.063 | 0.02    | 0.02   | -0.024, 0.059 |  |
|             | 1957                          | 0.03    | 0.01 | 0.017, 0.039   | 0.02    | 0.01   | 0.010, 0.032   | 0.03    | 0.01 | 0.008, 0.049   | 0.02    | 0.01   | 0.002, 0.043   | 0.03    | 0.02 | -0.015, 0.068 | 0.02    | 0.02   | -0.021, 0.061 |  |
|             | 1958                          | 0.02    | 0.01 | 0.007, 0.029   | 0.01    | 0.01   | 0.000, 0.022   | 0.02    | 0.01 | -0.001, 0.041  | 0.01    | 0.01   | -0.007, 0.035  | -0.01   | 0.02 | -0.051, 0.032 | -0.02   | 0.02   | -0.058, 0.026 |  |
|             | 1959                          | 0.02    | 0.01 | 0.006, 0.029   | 0.01    | 0.01   | -0.001, 0.022  | 0.03    | 0.01 | 0.004, 0.047   | 0.02    | 0.01   | -0.001, 0.042  | 0.01    | 0.02 | -0.029, 0.057 | 0.01    | 0.02   | -0.035, 0.051 |  |
| Education   | Primary (<9 years)            | 0.02    | 0.01 | 0.010, 0.032   | 0.02    | 0.01   | 0.005, 0.028   | 0.01    | 0.01 | -0.009, 0.034  | 0.01    | 0.01   | -0.011, 0.031  | 0.03    | 0.02 | -0.010, 0.077 | 0.03    | 0.02   | -0.014, 0.073 |  |
|             | Primary (9 years)             | 0.01    | 0.01 | -0.006, 0.017  | 0.00    | 0.01   | -0.008, 0.014  | 0.02    | 0.01 | -0.001, 0.042  | 0.02    | 0.01   | -0.003, 0.040  | 0.00    | 0.02 | -0.038, 0.048 | 0.00    | 0.02   | -0.041, 0.044 |  |
|             | Secondary (10-11 years) (ref) | 0.00    |      |                | 0.00    |        |                | 0.01    | 0.01 | -0.011, 0.011  | 0.01    | 0.01   | -0.008, 0.034  | 0.00    | 0.02 | -0.045, 0.041 | 0.00    | 0.02   | -0.046, 0.040 |  |
|             | Secondary (12 years)          | 0.00    | 0.01 | -0.008, 0.014  | 0.00    | 0.01   | -0.008, 0.013  | 0.00    | 0.01 | -0.011, 0.030  | 0.01    | 0.01   | -0.011, 0.030  | 0.03    | 0.02 | -0.012, 0.074 | 0.03    | 0.02   | -0.011, 0.075 |  |
|             | Tertiary (13-15 years)        | -0.01   | 0.01 | -0.025, -0.003 | -0.01   | 0.01   | -0.024, -0.002 | 0.00    | 0.01 | -0.020, 0.023  | 0.00    | 0.01   | -0.019, 0.024  | 0.02    | 0.02 | -0.022, 0.067 | 0.03    | 0.02   | -0.020, 0.070 |  |
|             | Tertiary (15+ years)          | -0.02   | 0.01 | -0.035, -0.014 | -0.02   | 0.01   | -0.033, -0.011 | -0.01   | 0.01 | -0.030, 0.013  | -0.01   | 0.01   | -0.028, 0.015  | 0.00    | 0.02 | -0.046, 0.045 | 0.00    | 0.02   | -0.044, 0.046 |  |
|             | Post-graduate                 | 0.01    | 0.01 | -0.008, 0.024  | 0.01    | 0.01   | 0.008, 0.020   | 0.01    | 0.01 | -0.008, 0.026  | 0.00    | 0.01   | -0.028, 0.026  | 0.00    | 0.02 | -0.046, 0.045 | 0.02    | 0.03   | -0.032, 0.068 |  |
|             | Missing                       | 0.00    |      |                | 0.00    |        |                | 0.00    |      |                | 0.00    |        |                | 0.00    |      |               | 0.01    | 0.01   | -0.011, 0.029 |  |
|             | Family Size                   | 1 (ref) | 0.00 |                |         | 0.00   |                |         | 0.00 |                |         | 0.00   |                |         | 0.00 |               |         | 0.00   |               |  |
|             |                               | 2 (ref) | 0.00 |                |         | 0.00   |                |         | 0.00 |                |         | 0.00   |                |         | 0.00 |               |         | 0.00   |               |  |
| 3           |                               | 0.02    | 0.00 | 0.012, 0.022   | 0.02    | 0.00   | -0.029, -0.016 | 0.02    | 0.01 | 0.005, 0.025   | 0.01    | 0.01   | 0.005, 0.025   | 0.01    | 0.03 | 0.003, 0.018  | 0.03    | 0.01   | 0.006, 0.047  |  |
| 4           |                               | 0.05    | 0.00 | 0.044, 0.059   | 0.05    | 0.00   | 0.044, 0.059   | 0.02    | 0.01 | 0.011, 0.038   | 0.02    | 0.01   | 0.011, 0.038   | 0.03    | 0.03 | 0.001, 0.057  | 0.03    | 0.01   | 0.006, 0.057  |  |
| 5           |                               | 0.08    | 0.01 | 0.067, 0.089   | 0.08    | 0.01   | 0.067, 0.089   | 0.06    | 0.01 | 0.043, 0.081   | 0.06    | 0.01   | 0.043, 0.081   | 0.09    | 0.02 | 0.049, 0.122  | 0.09    | 0.02   | 0.049, 0.122  |  |
| 6           |                               | 0.13    | 0.01 | 0.113, 0.141   | 0.13    | 0.01   | 0.113, 0.141   | 0.10    | 0.01 | 0.080, 0.126   | 0.10    | 0.01   | 0.080, 0.126   | 0.11    | 0.02 | 0.069, 0.152  | 0.11    | 0.02   | 0.069, 0.152  |  |
| Birth Order | 1 (ref)                       | 0.00    |      |                | 0.00    |        |                | 0.00    |      |                | 0.00    |        |                | 0.00    |      |               | 0.00    |        |               |  |
|             | 2                             | -0.01   | 0.00 | -0.020, -0.010 | -0.01   | 0.00   | -0.020, -0.010 | -0.01   | 0.00 | -0.017, 0.002  | -0.01   | 0.00   | -0.017, 0.002  | -0.01   | 0.01 | -0.026, 0.000 | -0.01   | 0.01   | -0.026, 0.012 |  |
|             | 3                             | -0.02   | 0.00 | -0.026, -0.012 | -0.02   | 0.00   | -0.026, -0.012 | -0.01   | 0.01 | -0.026, 0.000  | -0.01   | 0.01   | -0.026, 0.000  | -0.01   | 0.01 | -0.037, 0.013 | -0.01   | 0.01   | -0.037, 0.013 |  |
|             | 4                             | -0.04   | 0.01 | -0.049, -0.028 | -0.04   | 0.01   | -0.049, -0.028 | -0.02   | 0.01 | -0.041, -0.003 | -0.02   | 0.01   | -0.041, -0.003 | -0.02   | 0.02 | -0.058, 0.015 | -0.02   | 0.02   | -0.058, 0.015 |  |
|             | 5                             | -0.06   | 0.01 | -0.080, -0.047 | -0.06   | 0.01   | -0.080, -0.047 | -0.04   | 0.01 | -0.072, -0.014 | -0.04   | 0.01   | -0.072, -0.014 | -0.05   | 0.03 | -0.101, 0.007 | -0.05   | 0.03   | -0.101, 0.007 |  |
|             | 6                             | -0.06   | 0.01 | -0.084, -0.043 | -0.06   | 0.01   | -0.084, -0.043 | -0.04   | 0.02 | -0.072, -0.004 | -0.04   | 0.02   | -0.072, -0.004 | -0.01   | 0.03 | -0.071, 0.049 | -0.01   | 0.03   | -0.071, 0.049 |  |
| N           |                               | 198,280 |      | 198,280        |         | 54,470 |                | 54,470  |      | 14,373         |         | 14,373 |                | 14,373  |      | 14,373        |         | 14,373 |               |  |

TABLE S15. Linear regression: parity progression regressed on IQ (categorical), fixed effects. Swedish men born 1951-1967.

| Variable               | Category                      | Childless |                |                |         |                |                |         |               |                |         |               |                |         |                |               |       |                |               |
|------------------------|-------------------------------|-----------|----------------|----------------|---------|----------------|----------------|---------|---------------|----------------|---------|---------------|----------------|---------|----------------|---------------|-------|----------------|---------------|
|                        |                               | Model 1   |                |                | Model 2 |                |                | Model 1 |               |                | Model 2 |               |                |         |                |               |       |                |               |
|                        |                               | $\beta$   | SE             | 95% CI         | $\beta$ | SE             | 95% CI         | $\beta$ | SE            | 95% CI         | $\beta$ | SE            | 95% CI         |         |                |               |       |                |               |
| IQ                     | Below 74                      | 0.23      | 0.01           | 0.215, 0.251   | 0.22    | 0.01           | 0.205, 0.241   | -0.06   | 0.01          | -0.086, -0.039 | -0.06   | 0.01          | -0.084, -0.036 | 0.00    | 0.02           | -0.036, 0.045 | 0.00  | 0.02           | -0.041, 0.041 |
|                        | 74 to 81                      | 0.11      | 0.01           | 0.099, 0.124   | 0.10    | 0.01           | 0.092, 0.117   | -0.05   | 0.01          | -0.064, -0.033 | -0.05   | 0.01          | -0.062, -0.030 | 0.03    | 0.01           | 0.005, 0.059  | 0.03  | 0.01           | 0.001, 0.056  |
|                        | 81 to 89                      | 0.04      | 0.01           | 0.034, 0.054   | 0.04    | 0.01           | 0.029, 0.049   | -0.03   | 0.01          | -0.040, -0.014 | -0.02   | 0.01          | -0.037, -0.012 | 0.02    | 0.01           | -0.007, 0.037 | 0.01  | 0.01           | -0.010, 0.034 |
|                        | 89 to 96                      | 0.02      | 0.00           | 0.013, 0.030   | 0.02    | 0.00           | 0.010, 0.027   | -0.01   | 0.01          | -0.017, 0.005  | 0.00    | 0.01          | -0.016, 0.006  | 0.01    | 0.01           | -0.014, 0.024 | 0.00  | 0.01           | -0.016, 0.023 |
|                        | 96 to 104 (ref)               | 0.00      |                |                | 0.00    |                |                | 0.00    |               |                | 0.00    |               |                | 0.00    |                |               | 0.00  |                |               |
|                        | 104 to 111                    | -0.01     | 0.00           | -0.021, -0.004 | -0.01   | 0.00           | -0.018, 0.000  | 0.01    | 0.01          | -0.003, 0.018  | 0.01    | 0.01          | -0.006, 0.016  | 0.00    | 0.01           | -0.021, 0.017 | 0.00  | 0.01           | -0.019, 0.019 |
|                        | 111 to 119                    | -0.02     | 0.00           | -0.033, -0.013 | -0.02   | 0.01           | -0.025, -0.006 | 0.02    | 0.01          | 0.011, 0.035   | 0.02    | 0.01          | 0.006, 0.030   | 0.01    | 0.01           | -0.016, 0.028 | 0.01  | 0.01           | -0.013, 0.031 |
|                        | 119 to 126                    | -0.04     | 0.01           | -0.050, -0.026 | -0.03   | 0.01           | -0.039, -0.014 | 0.02    | 0.01          | 0.010, 0.039   | 0.02    | 0.01          | 0.001, 0.031   | 0.02    | 0.01           | -0.005, 0.049 | 0.02  | 0.01           | -0.002, 0.052 |
|                        | Above 126                     | -0.03     | 0.01           | -0.049, -0.017 | -0.02   | 0.01           | -0.033, 0.000  | 0.03    | 0.01          | 0.015, 0.054   | 0.02    | 0.01          | 0.003, 0.042   | 0.05    | 0.02           | 0.010, 0.080  | 0.04  | 0.02           | 0.008, 0.080  |
|                        | Not Tested                    | 0.43      | 0.01           | 0.409, 0.452   | 0.40    | 0.01           | 0.379, 0.422   | -0.05   | 0.02          | -0.083, -0.018 | -0.05   | 0.02          | -0.084, -0.018 | 0.02    | 0.03           | -0.033, 0.079 | 0.02  | 0.03           | -0.034, 0.078 |
| Birth Year             | Missing                       | 0.12      | 0.01           | 0.099, 0.136   | 0.11    | 0.01           | 0.095, 0.132   | -0.01   | 0.01          | -0.038, 0.009  | -0.02   | 0.01          | -0.039, 0.008  | 0.02    | 0.02           | -0.017, 0.065 | 0.02  | 0.02           | -0.017, 0.065 |
|                        | 1951                          | -0.07     | 0.01           | -0.083, -0.050 | -0.10   | 0.01           | -0.122, -0.072 | 0.02    | 0.01          | 0.000, 0.041   | 0.03    | 0.02          | 0.001, 0.064   | 0.15    | 0.02           | 0.117, 0.189  | 0.10  | 0.03           | 0.041, 0.151  |
|                        | 1952                          | -0.07     | 0.01           | -0.083, -0.051 | -0.09   | 0.01           | -0.117, -0.070 | 0.01    | 0.01          | -0.012, 0.027  | 0.02    | 0.01          | -0.010, 0.049  | 0.18    | 0.02           | 0.144, 0.214  | 0.13  | 0.03           | 0.074, 0.177  |
|                        | 1953                          | -0.06     | 0.01           | -0.079, -0.048 | -0.09   | 0.01           | -0.109, -0.065 | 0.03    | 0.01          | 0.014, 0.053   | 0.04    | 0.01          | 0.017, 0.072   | 0.17    | 0.02           | 0.139, 0.207  | 0.13  | 0.02           | 0.078, 0.174  |
|                        | 1954                          | -0.06     | 0.01           | -0.074, -0.044 | -0.08   | 0.01           | -0.103, -0.061 | 0.01    | 0.01          | -0.005, 0.033  | 0.02    | 0.01          | -0.001, 0.051  | 0.17    | 0.02           | 0.132, 0.199  | 0.12  | 0.02           | 0.076, 0.168  |
|                        | 1955                          | -0.06     | 0.01           | -0.074, -0.044 | -0.08   | 0.01           | -0.097, -0.059 | 0.03    | 0.01          | 0.007, 0.044   | 0.04    | 0.01          | 0.011, 0.060   | 0.17    | 0.02           | 0.135, 0.200  | 0.13  | 0.02           | 0.086, 0.172  |
|                        | 1956                          | -0.05     | 0.01           | -0.064, -0.035 | -0.07   | 0.01           | -0.085, -0.048 | 0.03    | 0.01          | 0.010, 0.046   | 0.04    | 0.01          | 0.014, 0.061   | 0.17    | 0.02           | 0.140, 0.204  | 0.14  | 0.02           | 0.096, 0.177  |
|                        | 1957                          | -0.05     | 0.01           | -0.064, -0.035 | -0.06   | 0.01           | -0.082, -0.047 | 0.03    | 0.01          | 0.014, 0.050   | 0.04    | 0.01          | 0.018, 0.062   | 0.16    | 0.02           | 0.129, 0.193  | 0.13  | 0.02           | 0.091, 0.169  |
|                        | 1958                          | -0.05     | 0.01           | -0.060, -0.032 | -0.06   | 0.01           | -0.076, -0.042 | 0.03    | 0.01          | 0.009, 0.044   | 0.03    | 0.01          | 0.013, 0.055   | 0.14    | 0.02           | 0.112, 0.174  | 0.12  | 0.02           | 0.079, 0.153  |
|                        | 1959                          | -0.04     | 0.01           | -0.050, -0.022 | -0.05   | 0.01           | -0.064, -0.032 | 0.02    | 0.01          | 0.006, 0.041   | 0.03    | 0.01          | 0.010, 0.050   | 0.12    | 0.02           | 0.091, 0.153  | 0.10  | 0.02           | 0.063, 0.134  |
| Education              | 1961                          | -0.03     | 0.01           | -0.048, -0.020 | -0.04   | 0.01           | -0.056, -0.026 | 0.01    | 0.01          | -0.009, 0.025  | 0.01    | 0.01          | -0.006, 0.031  | 0.09    | 0.02           | 0.057, 0.118  | 0.07  | 0.02           | 0.038, 0.103  |
|                        | 1962                          | -0.02     | 0.01           | -0.031, -0.004 | -0.02   | 0.01           | -0.037, -0.009 | 0.01    | 0.01          | -0.003, 0.031  | 0.02    | 0.01          | -0.001, 0.035  | 0.08    | 0.02           | 0.046, 0.107  | 0.06  | 0.02           | 0.031, 0.095  |
|                        | 1963                          | -0.02     | 0.01           | -0.030, -0.003 | -0.02   | 0.01           | -0.034, -0.007 | 0.01    | 0.01          | -0.007, 0.028  | 0.01    | 0.01          | -0.005, 0.030  | 0.06    | 0.02           | 0.034, 0.096  | 0.06  | 0.02           | 0.025, 0.087  |
|                        | 1964                          | -0.02     | 0.01           | -0.035, -0.007 | -0.02   | 0.01           | -0.037, -0.008 | 0.01    | 0.01          | -0.012, 0.024  | 0.01    | 0.01          | -0.011, 0.025  | 0.05    | 0.02           | 0.022, 0.086  | 0.05  | 0.02           | 0.017, 0.081  |
|                        | 1965 (ref)                    | 0.00      |                |                | 0.00    |                |                | 0.00    |               |                | 0.00    |               |                | 0.00    |                |               | 0.00  |                |               |
|                        | 1966                          | 0.01      | 0.01           | -0.004, 0.026  | 0.01    | 0.01           | -0.001, 0.029  | -0.02   | 0.01          | -0.037, 0.001  | -0.02   | 0.01          | -0.039, 0.000  | 0.00    | 0.02           | -0.035, 0.034 | 0.00  | 0.02           | -0.031, 0.038 |
|                        | 1967                          | 0.01      | 0.01           | -0.005, 0.024  | 0.01    | 0.01           | 0.000, 0.030   | -0.02   | 0.01          | -0.038, -0.001 | -0.02   | 0.01          | -0.041, -0.003 | -0.03   | 0.02           | -0.061, 0.006 | -0.02 | 0.02           | -0.051, 0.017 |
|                        | Primary (<9 years)            | 0.07      | 0.01           | 0.048, 0.088   | 0.07    | 0.01           | 0.048, 0.088   | 0.02    | 0.01          | -0.008, 0.044  | 0.02    | 0.01          | -0.008, 0.044  | 0.03    | 0.02           | -0.015, 0.074 | 0.03  | 0.02           | -0.015, 0.074 |
|                        | Primary (9 years)             | 0.03      | 0.00           | 0.020, 0.036   | 0.03    | 0.00           | 0.020, 0.036   | 0.00    | 0.01          | -0.014, 0.006  | 0.00    | 0.01          | -0.014, 0.006  | 0.01    | 0.01           | -0.008, 0.027 | 0.01  | 0.01           | -0.008, 0.027 |
|                        | Secondary (10-11 years) (ref) | 0.00      |                |                | 0.00    |                |                | 0.00    |               |                | 0.00    |               |                | 0.00    |                |               | 0.00  |                |               |
| Secondary (12 years)   | 0.01                          | 0.00      | -0.001, 0.018  | 0.01           | 0.00    | -0.001, 0.018  | 0.01           | 0.01    | -0.001, 0.022 | 0.01           | 0.01    | -0.001, 0.022 | -0.01          | 0.01    | -0.027, 0.014  | -0.01         | 0.01  | -0.027, 0.014  |               |
| Tertiary (13-15 years) | -0.01                         | 0.00      | -0.023, -0.005 | -0.01          | 0.00    | -0.023, -0.005 | 0.02           | 0.01    | 0.008, 0.030  | 0.02           | 0.01    | 0.008, 0.030  | -0.05          | 0.01    | -0.065, -0.025 | -0.05         | 0.01  | -0.065, -0.025 |               |
| Tertiary (15+ years)   | -0.04                         | 0.01      | -0.046, -0.026 | -0.04          | 0.01    | -0.046, -0.026 | 0.03           | 0.01    | 0.016, 0.041  | 0.03           | 0.01    | 0.016, 0.041  | 0.00           | 0.01    | -0.018, 0.027  | 0.00          | 0.01  | -0.018, 0.027  |               |
| Post-graduate          | -0.07                         | 0.01      | -0.094, -0.045 | -0.07          | 0.01    | -0.094, -0.045 | 0.08           | 0.01    | 0.047, 0.105  | 0.08           | 0.01    | 0.047, 0.105  | 0.05           | 0.03    | 0.001, 0.108   | 0.05          | 0.03  | 0.001, 0.108   |               |
| Missing                | 0.40                          | 0.02      | 0.350, 0.443   | 0.40           | 0.02    | 0.350, 0.443   | 0.02           | 0.06    | -0.097, 0.131 | 0.02           | 0.06    | -0.097, 0.131 | 0.02           | 0.10    | -0.172, 0.206  | 0.02          | 0.10  | -0.172, 0.206  |               |
| Birth Order            | -0.01                         | 0.00      | -0.012, -0.002 | -0.01          | 0.00    | -0.012, -0.002 | 0.00           | 0.00    | -0.002, 0.011 | 0.00           | 0.00    | -0.002, 0.011 | -0.02          | 0.01    | -0.027, -0.004 | -0.02         | 0.01  | -0.027, -0.004 |               |
| N                      |                               | 205,685   |                | 205,685        |         | 205,685        |                | 163,246 |               | 163,246        |         | 163,246       |                | 131,953 |                | 131,953       |       | 131,953        |               |

TABLE S16. Linear regression: parity progression regressed on IQ (categorical), fixed effects. Swedish men born 1951-1967.

| Variable               | Category                      | 3 → 4   |               |               | 4 → 5   |               |               | 5 → 6+  |      |               |         |                |               |       |      |               |       |               |               |  |
|------------------------|-------------------------------|---------|---------------|---------------|---------|---------------|---------------|---------|------|---------------|---------|----------------|---------------|-------|------|---------------|-------|---------------|---------------|--|
|                        |                               | Model 1 |               |               | Model 2 |               |               | Model 1 |      |               | Model 2 |                |               |       |      |               |       |               |               |  |
|                        |                               | $\beta$ | SE            | 95% CI        | $\beta$ | SE            | 95% CI        | $\beta$ | SE   | 95% CI        | $\beta$ | SE             | 95% CI        |       |      |               |       |               |               |  |
| IQ                     | Below 74                      | -0.01   | 0.04          | -0.099, 0.073 | -0.01   | 0.04          | -0.098, 0.075 | 0.07    | 0.11 | -0.141, 0.290 | 0.07    | 0.11           | -0.149, 0.287 | 0.47  | 0.25 | -0.032, 0.964 | 0.39  | 0.28          | -0.152, 0.939 |  |
|                        | 74 to 81                      | 0.01    | 0.03          | -0.051, 0.061 | 0.01    | 0.03          | -0.051, 0.062 | 0.06    | 0.07 | -0.085, 0.204 | 0.06    | 0.07           | -0.087, 0.203 | 0.22  | 0.22 | -0.217, 0.663 | 0.29  | 0.20          | -0.113, 0.686 |  |
|                        | 81 to 89                      | -0.01   | 0.02          | -0.053, 0.041 | -0.01   | 0.02          | -0.053, 0.042 | -0.04   | 0.06 | -0.167, 0.083 | -0.05   | 0.06           | -0.173, 0.079 | 0.40  | 0.22 | -0.037, 0.837 | 0.41  | 0.21          | -0.002, 0.822 |  |
|                        | 89 to 96                      | 0.01    | 0.02          | -0.028, 0.057 | 0.01    | 0.02          | -0.029, 0.056 | 0.02    | 0.06 | -0.095, 0.133 | 0.01    | 0.06           | -0.100, 0.128 | 0.13  | 0.17 | -0.215, 0.467 | 0.14  | 0.17          | -0.191, 0.479 |  |
|                        | 96 to 104 (ref)               | 0.00    |               |               | 0.00    |               |               | 0.00    |      |               | 0.00    |                |               | 0.00  |      |               | 0.00  |               |               |  |
|                        | 104 to 111                    | -0.01   | 0.02          | -0.048, 0.036 | 0.00    | 0.02          | -0.047, 0.037 | 0.00    | 0.06 | -0.114, 0.113 | 0.00    | 0.06           | -0.113, 0.115 | 0.18  | 0.18 | -0.164, 0.523 | 0.24  | 0.16          | -0.080, 0.564 |  |
|                        | 111 to 119                    | -0.01   | 0.02          | -0.053, 0.042 | 0.00    | 0.02          | -0.050, 0.046 | -0.01   | 0.07 | -0.147, 0.133 | 0.00    | 0.07           | -0.141, 0.141 | 0.21  | 0.23 | -0.237, 0.663 | 0.11  | 0.23          | -0.339, 0.552 |  |
|                        | 119 to 126                    | 0.00    | 0.03          | -0.062, 0.056 | 0.00    | 0.03          | -0.057, 0.062 | -0.02   | 0.09 | -0.195, 0.161 | -0.02   | 0.09           | -0.197, 0.160 | 0.54  | 0.30 | -0.052, 1.127 | 0.61  | 0.26          | 0.103, 1.121  |  |
|                        | Above 126                     | -0.05   | 0.04          | -0.128, 0.023 | -0.04   | 0.04          | -0.121, 0.033 | -0.04   | 0.13 | -0.295, 0.206 | -0.05   | 0.13           | -0.301, 0.205 | -0.27 | 0.47 | -1.202, 0.657 | 0.13  | 0.48          | -0.811, 1.079 |  |
|                        | Not Tested                    | -0.04   | 0.06          | -0.158, 0.079 | -0.04   | 0.06          | -0.159, 0.078 | 0.01    | 0.14 | -0.265, 0.281 | 0.00    | 0.14           | -0.266, 0.273 | -0.10 | 0.29 | -0.679, 0.473 | -0.35 | 0.33          | -0.989, 0.299 |  |
| Birth Year             | Missing                       | 0.01    | 0.04          | -0.075, 0.101 | 0.01    | 0.05          | -0.074, 0.102 | 0.05    | 0.13 | -0.213, 0.313 | 0.04    | 0.13           | -0.223, 0.305 | 0.45  | 0.32 | -0.180, 1.083 | 0.60  | 0.25          | 0.104, 1.101  |  |
|                        | 1951                          | 0.08    | 0.04          | -0.002, 0.155 | 0.05    | 0.06          | -0.074, 0.169 | 0.08    | 0.11 | -0.131, 0.293 | 0.12    | 0.17           | -0.216, 0.454 | 0.03  | 0.39 | -0.721, 0.789 | -0.41 | 0.55          | -1.500, 0.674 |  |
|                        | 1952                          | 0.08    | 0.04          | 0.001, 0.153  | 0.05    | 0.06          | -0.062, 0.164 | 0.16    | 0.10 | -0.043, 0.366 | 0.20    | 0.16           | -0.117, 0.514 | -0.06 | 0.41 | -0.859, 0.733 | -0.56 | 0.59          | -1.711, 0.583 |  |
|                        | 1953                          | 0.08    | 0.04          | 0.002, 0.150  | 0.05    | 0.05          | -0.053, 0.159 | -0.05   | 0.10 | -0.252, 0.156 | -0.02   | 0.15           | -0.317, 0.280 | 0.00  | 0.39 | -0.761, 0.764 | -0.31 | 0.51          | -1.305, 0.678 |  |
|                        | 1954                          | 0.08    | 0.04          | 0.009, 0.156  | 0.06    | 0.05          | -0.039, 0.164 | 0.01    | 0.10 | -0.181, 0.207 | 0.04    | 0.15           | -0.240, 0.330 | -0.24 | 0.36 | -0.942, 0.461 | -0.66 | 0.50          | -1.646, 0.318 |  |
|                        | 1955                          | 0.06    | 0.04          | -0.012, 0.132 | 0.04    | 0.05          | -0.052, 0.137 | 0.05    | 0.10 | -0.150, 0.243 | 0.07    | 0.14           | -0.193, 0.336 | 0.15  | 0.39 | -0.606, 0.915 | -0.21 | 0.49          | -1.167, 0.743 |  |
|                        | 1956                          | 0.03    | 0.04          | -0.035, 0.105 | 0.02    | 0.05          | -0.072, 0.108 | -0.04   | 0.10 | -0.223, 0.153 | -0.01   | 0.13           | -0.257, 0.235 | -0.41 | 0.41 | -1.207, 0.392 | -0.63 | 0.47          | -1.554, 0.301 |  |
|                        | 1957                          | 0.06    | 0.04          | -0.014, 0.126 | 0.04    | 0.04          | -0.043, 0.128 | 0.03    | 0.10 | -0.156, 0.221 | 0.05    | 0.12           | -0.192, 0.285 | 0.04  | 0.36 | -0.674, 0.749 | -0.19 | 0.46          | -1.097, 0.708 |  |
|                        | 1958                          | 0.04    | 0.04          | -0.026, 0.112 | 0.03    | 0.04          | -0.051, 0.113 | -0.01   | 0.09 | -0.192, 0.175 | 0.00    | 0.11           | -0.221, 0.222 | -0.16 | 0.35 | -0.859, 0.530 | -0.35 | 0.43          | -1.183, 0.486 |  |
|                        | 1959                          | 0.04    | 0.04          | -0.026, 0.113 | 0.03    | 0.04          | -0.046, 0.111 | 0.02    | 0.10 | -0.179, 0.213 | 0.03    | 0.12           | -0.194, 0.260 | -0.26 | 0.36 | -0.971, 0.444 | -0.39 | 0.43          | -1.231, 0.449 |  |
| Education              | Primary (<9 years)            | 0.02    | 0.03          | -0.050, 0.086 | 0.01    | 0.04          | -0.062, 0.085 | -0.06   | 0.10 | -0.250, 0.129 | -0.06   | 0.11           | -0.264, 0.152 | -0.13 | 0.34 | -0.788, 0.536 | -0.28 | 0.37          | -1.007, 0.443 |  |
|                        | Primary (9 years)             | 0.07    | 0.04          | -0.001, 0.139 | 0.06    | 0.04          | -0.009, 0.137 | 0.01    | 0.10 | -0.190, 0.207 | 0.01    | 0.11           | -0.197, 0.218 | 0.38  | 0.37 | -1.113, 0.343 | -0.53 | 0.40          | -1.321, 0.263 |  |
|                        | Secondary (10-11 years) (ref) | -0.01   | 0.04          | -0.078, 0.063 | -0.01   | 0.04          | -0.081, 0.063 | 0.06    | 0.09 | -0.129, 0.239 | 0.06    | 0.10           | -0.132, 0.249 | -0.12 | 0.30 | -0.708, 0.467 | -0.18 | 0.32          | -0.805, 0.440 |  |
|                        | Secondary (12 years)          | -0.03   | 0.04          | -0.107, 0.040 | -0.03   | 0.04          | -0.108, 0.040 | -0.04   | 0.10 | -0.245, 0.163 | -0.04   | 0.11           | -0.246, 0.167 | -0.09 | 0.35 | -0.784, 0.597 | -0.20 | 0.37          | -0.929, 0.527 |  |
|                        | Secondary (13-15 years)       | 0.00    | 0.04          | -0.079, 0.087 | 0.01    | 0.04          | -0.075, 0.091 | 0.09    | 0.12 | -0.155, 0.335 | 0.08    | 0.13           | -0.163, 0.327 | 0.09  | 0.45 | -0.778, 0.967 | 0.19  | 0.47          | -0.732, 1.104 |  |
|                        | Secondary (14-16 years)       | -0.07   | 0.04          | -0.150, 0.008 | -0.06   | 0.04          | -0.145, 0.016 | -0.09   | 0.12 | -0.322, 0.143 | -0.10   | 0.12           | -0.333, 0.142 | -0.50 | 0.32 | -1.139, 0.131 | -0.32 | 0.35          | -0.998, 0.357 |  |
|                        | Primary (<9 years)            | -0.01   | 0.04          | -0.096, 0.080 | -0.01   | 0.04          | -0.096, 0.080 |         |      |               | 0.03    | 0.12           | -0.210, 0.270 |       |      |               | -0.24 | 0.32          | -0.874, 0.399 |  |
|                        | Primary (9 years)             | -0.02   | 0.02          | -0.058, 0.015 | -0.02   | 0.02          | -0.058, 0.015 |         |      |               | 0.05    | 0.05           | -0.044, 0.147 |       |      |               | -0.26 | 0.14          | -0.535, 0.024 |  |
|                        | Secondary (10-11 years) (ref) | 0.00    |               |               | 0.00    |               |               |         |      |               | 0.00    |                |               |       |      |               |       | 0.00          |               |  |
|                        | Secondary (12 years)          | -0.02   | 0.02          | -0.051, 0.042 | -0.02   | 0.02          | -0.051, 0.042 |         |      |               | -0.02   | 0.07           | -0.156, 0.112 |       |      |               | 0.23  | 0.23          | -0.225, 0.682 |  |
| Tertiary (13-15 years) | -0.04                         | 0.03    | -0.090, 0.012 | -0.04         | 0.03    | -0.090, 0.012 |               |         |      | -0.03         | 0.08    | -0.182, 0.114  |               |       |      | -0.47         | 0.28  | -1.027, 0.082 |               |  |
| Tertiary (15+ years)   | 0.00                          | 0.06    | -0.111, 0.115 | 0.00          | 0.06    | -0.111, 0.115 |               |         |      | 0.13          | 0.18    | -0.235, 0.489  |               |       |      | -             |       | -0.907, 0.058 |               |  |
| Post-graduate          | -0.10                         | 0.20    | -0.500, 0.295 | -0.10         | 0.20    | -0.500, 0.295 |               |         |      | -1.04         | 0.14    | -1.321, -0.756 |               |       |      | -             |       | -             |               |  |
| Missing                | -0.01                         | 0.01    | -0.033, 0.016 | -0.01         | 0.01    | -0.033, 0.016 |               |         |      | 0.01          | 0.03    | -0.053, 0.076  |               |       |      | -0.11         | 0.09  | -0.292, 0.066 |               |  |
| Birth Order            |                               |         |               |               |         |               |               |         |      |               |         |                |               |       |      |               |       |               |               |  |
| N                      |                               | 65,195  |               | 65,195        |         | 20,638        |               | 20,638  |      | 20,638        |         | 5,776          |               | 5,776 |      | 5,776         |       |               |               |  |

TABLE S17. Linear regression: progression to two (1 → 2) or three or more (2 → 3+) childbearing partners regressed on IQ (categorical), no fixed effects. Swedish men born 1951-1967.

| Variable               | Category                      | Model 1 |                |                |         |                | Model 2        |         |               |                |         | Model 1        |                |         |    |        | Model 2 |    |        |  |  |
|------------------------|-------------------------------|---------|----------------|----------------|---------|----------------|----------------|---------|---------------|----------------|---------|----------------|----------------|---------|----|--------|---------|----|--------|--|--|
|                        |                               | $\beta$ | SE             | 95% CI         | $\beta$ | SE             | 95% CI         | $\beta$ | SE            | 95% CI         | $\beta$ | SE             | 95% CI         | $\beta$ | SE | 95% CI | $\beta$ | SE | 95% CI |  |  |
|                        |                               |         |                |                |         |                |                |         |               |                |         |                |                |         |    |        |         |    |        |  |  |
| IQ                     | Below 74                      | 0.07    | 0.00           | 0.064, 0.078   | 0.06    | 0.00           | 0.049, 0.063   | 0.06    | 0.01          | 0.043, 0.072   | 0.05    | 0.01           | 0.033, 0.062   |         |    |        |         |    |        |  |  |
|                        | 74 to 81                      | 0.05    | 0.00           | 0.046, 0.055   | 0.04    | 0.00           | 0.033, 0.042   | 0.05    | 0.00          | 0.037, 0.056   | 0.04    | 0.01           | 0.028, 0.047   |         |    |        |         |    |        |  |  |
|                        | 81 to 89                      | 0.03    | 0.00           | 0.024, 0.030   | 0.02    | 0.00           | 0.014, 0.021   | 0.03    | 0.00          | 0.024, 0.041   | 0.03    | 0.00           | 0.018, 0.034   |         |    |        |         |    |        |  |  |
|                        | 89 to 96                      | 0.01    | 0.00           | 0.010, 0.016   | 0.01    | 0.00           | 0.004, 0.010   | 0.01    | 0.00          | 0.007, 0.021   | 0.01    | 0.00           | 0.003, 0.017   |         |    |        |         |    |        |  |  |
|                        | 96 to 104 (ref)               | 0.00    |                |                | 0.00    |                |                | 0.00    |               |                | 0.00    |                |                |         |    |        |         |    |        |  |  |
|                        | 104 to 111                    | -0.02   | 0.00           | -0.022, -0.016 | -0.01   | 0.00           | -0.014, -0.009 | -0.01   | 0.00          | -0.016, -0.002 | 0.00    | 0.00           | -0.010, 0.003  |         |    |        |         |    |        |  |  |
|                        | 111 to 119                    | -0.03   | 0.00           | -0.033, -0.028 | -0.02   | 0.00           | -0.018, -0.013 | -0.02   | 0.00          | -0.026, -0.011 | -0.01   | 0.00           | -0.015, 0.001  |         |    |        |         |    |        |  |  |
|                        | 119 to 126                    | -0.04   | 0.00           | -0.044, -0.037 | -0.02   | 0.00           | -0.022, -0.016 | -0.04   | 0.00          | -0.045, -0.028 | -0.02   | 0.00           | -0.028, -0.010 |         |    |        |         |    |        |  |  |
|                        | Above 126                     | -0.05   | 0.00           | -0.058, -0.050 | -0.03   | 0.00           | -0.031, -0.023 | -0.04   | 0.01          | -0.054, -0.031 | -0.02   | 0.01           | -0.031, -0.008 |         |    |        |         |    |        |  |  |
|                        | Not Tested                    | 0.04    | 0.00           | 0.027, 0.044   | 0.03    | 0.00           | 0.026, 0.043   | 0.08    | 0.01          | 0.056, 0.101   | 0.08    | 0.01           | 0.054, 0.098   |         |    |        |         |    |        |  |  |
| Birth Year             | Missing                       | 0.02    | 0.00           | 0.016, 0.028   | 0.02    | 0.00           | 0.019, 0.031   | 0.02    | 0.01          | 0.005, 0.032   | 0.02    | 0.01           | 0.006, 0.033   |         |    |        |         |    |        |  |  |
|                        | 1951                          | 0.01    | 0.00           | 0.003, 0.013   | 0.00    | 0.00           | 0.000, 0.009   | 0.03    | 0.01          | 0.015, 0.039   | 0.03    | 0.01           | 0.014, 0.038   |         |    |        |         |    |        |  |  |
|                        | 1952                          | 0.01    | 0.00           | 0.003, 0.013   | 0.00    | 0.00           | -0.001, 0.009  | 0.02    | 0.01          | 0.009, 0.032   | 0.02    | 0.01           | 0.008, 0.031   |         |    |        |         |    |        |  |  |
|                        | 1953                          | 0.00    | 0.00           | -0.001, 0.009  | 0.00    | 0.00           | -0.004, 0.005  | 0.02    | 0.01          | 0.012, 0.036   | 0.02    | 0.01           | 0.011, 0.035   |         |    |        |         |    |        |  |  |
|                        | 1954                          | 0.00    | 0.00           | -0.004, 0.005  | 0.00    | 0.00           | -0.008, 0.001  | 0.02    | 0.01          | 0.010, 0.034   | 0.02    | 0.01           | 0.009, 0.033   |         |    |        |         |    |        |  |  |
|                        | 1955                          | 0.00    | 0.00           | -0.002, 0.008  | 0.00    | 0.00           | -0.005, 0.004  | 0.02    | 0.01          | 0.004, 0.027   | 0.01    | 0.01           | 0.003, 0.026   |         |    |        |         |    |        |  |  |
|                        | 1956                          | 0.00    | 0.00           | -0.003, 0.006  | 0.00    | 0.00           | -0.007, 0.002  | 0.01    | 0.01          | 0.001, 0.024   | 0.01    | 0.01           | 0.000, 0.023   |         |    |        |         |    |        |  |  |
|                        | 1957                          | 0.00    | 0.00           | -0.007, 0.002  | -0.01   | 0.00           | -0.011, -0.001 | 0.02    | 0.01          | 0.005, 0.029   | 0.02    | 0.01           | 0.004, 0.028   |         |    |        |         |    |        |  |  |
|                        | 1958                          | 0.00    | 0.00           | -0.009, 0.000  | -0.01   | 0.00           | -0.012, -0.003 | 0.02    | 0.01          | 0.004, 0.028   | 0.01    | 0.01           | 0.003, 0.027   |         |    |        |         |    |        |  |  |
|                        | 1959                          | -0.01   | 0.00           | -0.013, -0.003 | -0.01   | 0.00           | -0.016, -0.006 | 0.01    | 0.01          | -0.005, 0.020  | 0.01    | 0.01           | -0.006, 0.019  |         |    |        |         |    |        |  |  |
| Education              | 1961                          | 0.00    | 0.00           | -0.009, 0.000  | -0.01   | 0.00           | -0.011, -0.002 | 0.01    | 0.01          | -0.003, 0.021  | 0.01    | 0.01           | -0.003, 0.021  |         |    |        |         |    |        |  |  |
|                        | 1962                          | 0.00    | 0.00           | -0.005, 0.004  | 0.00    | 0.00           | -0.006, 0.003  | 0.01    | 0.01          | -0.001, 0.022  | 0.01    | 0.01           | -0.001, 0.022  |         |    |        |         |    |        |  |  |
|                        | 1963                          | 0.00    | 0.00           | -0.005, 0.004  | 0.00    | 0.00           | -0.006, 0.003  | 0.01    | 0.01          | 0.002, 0.025   | 0.01    | 0.01           | 0.002, 0.025   |         |    |        |         |    |        |  |  |
|                        | 1964                          | 0.00    | 0.00           | -0.005, 0.004  | 0.00    | 0.00           | -0.006, 0.003  | 0.00    | 0.01          | -0.009, 0.012  | 0.00    | 0.01           | -0.009, 0.013  |         |    |        |         |    |        |  |  |
|                        | 1965 (ref)                    | 0.00    |                |                | 0.00    |                |                | 0.00    |               |                | 0.00    |                |                |         |    |        |         |    |        |  |  |
|                        | 1966                          | -0.01   | 0.00           | -0.012, -0.003 | -0.01   | 0.00           | -0.011, -0.002 | 0.00    | 0.01          | -0.013, 0.009  | 0.00    | 0.01           | -0.012, 0.009  |         |    |        |         |    |        |  |  |
|                        | 1967                          | -0.01   | 0.00           | -0.013, -0.004 | -0.01   | 0.00           | -0.012, -0.003 | -0.01   | 0.01          | -0.016, 0.006  | 0.00    | 0.01           | -0.016, 0.006  |         |    |        |         |    |        |  |  |
|                        | Primary (<9 years)            |         |                |                | -0.01   | 0.00           | -0.014, 0.001  |         |               |                | 0.00    | 0.01           | -0.019, 0.017  |         |    |        |         |    |        |  |  |
|                        | Primary (9 years)             |         |                |                | 0.02    | 0.00           | 0.012, 0.018   |         |               |                | 0.00    | 0.00           | -0.004, 0.008  |         |    |        |         |    |        |  |  |
|                        | Secondary (10-11 years) (ref) |         |                |                | 0.00    |                |                |         |               |                | 0.00    |                |                |         |    |        |         |    |        |  |  |
| Secondary (12 years)   |                               |         |                | -0.02          | 0.00    | -0.022, -0.017 |                |         |               | -0.02          | 0.00    | -0.030, -0.016 |                |         |    |        |         |    |        |  |  |
| Tertiary (13-15 years) |                               |         |                | -0.04          | 0.00    | -0.040, -0.035 |                |         |               | -0.04          | 0.00    | -0.043, -0.030 |                |         |    |        |         |    |        |  |  |
| Tertiary (15+ years)   |                               |         |                | -0.05          | 0.00    | -0.048, -0.043 |                |         |               | -0.04          | 0.00    | -0.047, -0.033 |                |         |    |        |         |    |        |  |  |
| Post-graduate          |                               |         |                | -0.05          | 0.00    | -0.052, -0.040 |                |         |               | -0.05          | 0.01    | -0.063, -0.028 |                |         |    |        |         |    |        |  |  |
| Family Size            | Missing                       | 0.04    | 0.02           | 0.002, 0.075   | 0.04    | 0.02           | 0.002, 0.075   | 0.04    | 0.04          | -0.066, 0.074  | 0.00    | 0.04           | -0.066, 0.074  |         |    |        |         |    |        |  |  |
|                        | 1                             | 0.02    | 0.00           | 0.014, 0.020   | 0.02    | 0.00           | 0.014, 0.020   | 0.01    | 0.00          | 0.008, 0.022   | 0.01    | 0.00           | 0.008, 0.022   |         |    |        |         |    |        |  |  |
|                        | 2 (ref)                       | 0.00    |                |                | 0.00    |                |                | 0.00    |               |                | 0.00    |                |                |         |    |        |         |    |        |  |  |
|                        | 3                             | 0.01    | 0.00           | 0.006, 0.011   | 0.01    | 0.00           | 0.006, 0.011   | 0.01    | 0.00          | 0.002, 0.014   | 0.01    | 0.00           | 0.002, 0.014   |         |    |        |         |    |        |  |  |
|                        | 4                             | 0.02    | 0.00           | 0.019, 0.026   | 0.02    | 0.00           | 0.019, 0.026   | 0.01    | 0.00          | 0.007, 0.023   | 0.01    | 0.00           | 0.007, 0.023   |         |    |        |         |    |        |  |  |
|                        | 5                             | 0.03    | 0.00           | 0.026, 0.037   | 0.03    | 0.00           | 0.026, 0.037   | 0.03    | 0.01          | 0.017, 0.042   | 0.03    | 0.01           | 0.017, 0.042   |         |    |        |         |    |        |  |  |
| Birth Order            | 6                             | 0.05    | 0.00           | 0.038, 0.052   | 0.05    | 0.00           | 0.038, 0.052   | 0.03    | 0.01          | 0.016, 0.047   | 0.03    | 0.01           | 0.016, 0.047   |         |    |        |         |    |        |  |  |
|                        | 1 (ref)                       | 0.00    |                |                | 0.00    |                |                | 0.00    |               |                | 0.00    |                |                |         |    |        |         |    |        |  |  |
|                        | 2                             | -0.01   | 0.00           | -0.014, -0.010 | -0.01   | 0.00           | -0.014, -0.010 | -0.01   | 0.00          | -0.015, -0.005 | -0.01   | 0.00           | -0.015, -0.005 |         |    |        |         |    |        |  |  |
|                        | 3                             | -0.02   | 0.00           | -0.023, -0.017 | -0.02   | 0.00           | -0.023, -0.017 | -0.02   | 0.00          | -0.027, -0.011 | -0.02   | 0.00           | -0.027, -0.011 |         |    |        |         |    |        |  |  |
|                        | 4                             | -0.03   | 0.00           | -0.036, -0.026 | -0.03   | 0.00           | -0.036, -0.026 | -0.02   | 0.01          | -0.037, -0.012 | -0.02   | 0.01           | -0.037, -0.012 |         |    |        |         |    |        |  |  |
|                        | 5                             | -0.04   | 0.00           | -0.048, -0.032 | -0.04   | 0.00           | -0.048, -0.032 | -0.03   | 0.01          | -0.051, -0.013 | -0.03   | 0.01           | -0.051, -0.013 |         |    |        |         |    |        |  |  |
| 6                      | -0.05                         | 0.01    | -0.060, -0.040 | -0.05          | 0.01    | -0.060, -0.040 | -0.02          | 0.01    | -0.048, 0.000 | -0.02          | 0.01    | -0.048, 0.000  |                |         |    |        |         |    |        |  |  |
| N                      |                               |         | 590,655        |                |         | 590,655        |                |         | 74,594        |                |         | 74,594         |                |         |    |        |         |    |        |  |  |



TABLE S18. Linear regression: progression to two (1 → 2) or three or more (2 → 3+) childbearing partners regressed on IQ (categorical), fixed effects. Swedish men born 1951-1967.

| Variable      | Category                      | 1 → 2   |               |                |              |               |                | 2 → 3+        |               |               |               |               |               |               |
|---------------|-------------------------------|---------|---------------|----------------|--------------|---------------|----------------|---------------|---------------|---------------|---------------|---------------|---------------|---------------|
|               |                               | Model 1 |               |                | Model 2      |               |                | Model 1       |               |               | Model 2       |               |               |               |
|               |                               | $\beta$ | SE            | 95% CI         | $\beta$      | SE            | 95% CI         | $\beta$       | SE            | 95% CI        | $\beta$       | SE            | 95% CI        |               |
| IQ            | Below 74                      | 0.04    | 0.01          | 0.015, 0.057   | 0.03         | 0.01          | 0.012, 0.055   | -0.02         | 0.05          | -0.107, 0.070 | -0.02         | 0.05          | -0.113, 0.064 |               |
|               | 74 to 81                      | 0.02    | 0.01          | 0.007, 0.034   | 0.02         | 0.01          | 0.004, 0.032   | 0.02          | 0.03          | -0.037, 0.087 | 0.02          | 0.03          | -0.044, 0.082 |               |
|               | 81 to 89                      | 0.01    | 0.01          | 0.000, 0.021   | 0.01         | 0.01          | -0.002, 0.019  | 0.04          | 0.03          | -0.016, 0.100 | 0.04          | 0.03          | -0.020, 0.097 |               |
|               | 89 to 96                      | 0.01    | 0.00          | 0.001, 0.019   | 0.01         | 0.00          | -0.001, 0.018  | 0.01          | 0.03          | -0.045, 0.056 | 0.00          | 0.03          | -0.047, 0.055 |               |
|               | 96 to 104 (ref)               | 0.00    |               |                | 0.00         |               |                | 0.00          |               |               | 0.00          |               |               |               |
|               | 104 to 111                    | -0.01   | 0.00          | -0.020, -0.003 | -0.01        | 0.00          | -0.018, 0.000  | 0.03          | 0.03          | -0.026, 0.089 | 0.04          | 0.03          | -0.021, 0.094 |               |
|               | 111 to 119                    | -0.01   | 0.00          | -0.020, -0.001 | -0.01        | 0.00          | -0.015, 0.004  | -0.06         | 0.04          | -0.129, 0.010 | -0.05         | 0.04          | -0.120, 0.018 |               |
|               | 119 to 126                    | -0.02   | 0.01          | -0.028, -0.006 | -0.01        | 0.01          | -0.021, 0.002  | -0.01         | 0.04          | -0.094, 0.067 | -0.01         | 0.04          | -0.085, 0.075 |               |
|               | Above 126                     | -0.02   | 0.01          | -0.034, -0.004 | -0.01        | 0.01          | -0.026, 0.005  | -0.04         | 0.06          | -0.147, 0.074 | -0.02         | 0.06          | -0.136, 0.094 |               |
|               | Not Tested                    | 0.01    | 0.01          | -0.019, 0.036  | 0.01         | 0.01          | -0.019, 0.036  | 0.13          | 0.08          | -0.018, 0.281 | 0.13          | 0.08          | -0.017, 0.283 |               |
|               | Missing                       | 0.01    | 0.01          | -0.013, 0.027  | 0.01         | 0.01          | -0.012, 0.028  | -0.07         | 0.06          | -0.178, 0.041 | -0.07         | 0.06          | -0.180, 0.040 |               |
|               | Birth Year                    | 1951    | 0.05          | 0.01           | 0.028, 0.062 | 0.02          | 0.01           | -0.004, 0.047 | 0.01          | 0.05          | -0.079, 0.105 | -0.07         | 0.08          | -0.221, 0.074 |
|               |                               | 1952    | 0.05          | 0.01           | 0.032, 0.065 | 0.03          | 0.01           | 0.003, 0.051  | 0.01          | 0.05          | -0.080, 0.108 | -0.07         | 0.07          | -0.212, 0.068 |
| 1953          |                               | 0.04    | 0.01          | 0.023, 0.055   | 0.02         | 0.01          | -0.003, 0.042  | 0.03          | 0.05          | -0.063, 0.116 | -0.05         | 0.06          | -0.180, 0.074 |               |
| 1954          |                               | 0.05    | 0.01          | 0.031, 0.062   | 0.03         | 0.01          | 0.007, 0.050   | 0.00          | 0.05          | -0.089, 0.088 | -0.07         | 0.06          | -0.194, 0.046 |               |
| 1955          |                               | 0.04    | 0.01          | 0.022, 0.052   | 0.02         | 0.01          | 0.001, 0.041   | 0.01          | 0.05          | -0.077, 0.100 | -0.05         | 0.06          | -0.158, 0.063 |               |
| 1956          |                               | 0.02    | 0.01          | 0.006, 0.036   | 0.01         | 0.01          | -0.013, 0.025  | 0.02          | 0.04          | -0.062, 0.105 | -0.04         | 0.05          | -0.147, 0.068 |               |
| 1957          |                               | 0.03    | 0.01          | 0.011, 0.041   | 0.01         | 0.01          | -0.005, 0.031  | 0.00          | 0.05          | -0.087, 0.092 | -0.05         | 0.05          | -0.158, 0.056 |               |
| 1958          |                               | 0.02    | 0.01          | 0.005, 0.034   | 0.01         | 0.01          | -0.009, 0.025  | 0.01          | 0.04          | -0.080, 0.093 | -0.04         | 0.05          | -0.143, 0.062 |               |
| 1959          |                               | 0.01    | 0.01          | -0.002, 0.027  | 0.00         | 0.01          | -0.014, 0.019  | -0.05         | 0.04          | -0.132, 0.030 | -0.09         | 0.05          | -0.177, 0.004 |               |
| 1961          |                               | 0.00    | 0.01          | -0.014, 0.015  | -0.01        | 0.01          | -0.022, 0.008  | -0.04         | 0.04          | -0.120, 0.040 | -0.07         | 0.04          | -0.156, 0.015 |               |
| 1962          |                               | 0.02    | 0.01          | 0.006, 0.034   | 0.01         | 0.01          | -0.001, 0.029  | 0.06          | 0.04          | -0.024, 0.140 | 0.04          | 0.04          | -0.047, 0.122 |               |
| 1963          |                               | 0.01    | 0.01          | -0.007, 0.021  | 0.00         | 0.01          | -0.011, 0.018  | 0.07          | 0.04          | -0.005, 0.154 | 0.06          | 0.04          | -0.018, 0.144 |               |
| 1964          |                               | 0.01    | 0.01          | -0.005, 0.024  | 0.01         | 0.01          | -0.007, 0.022  | 0.01          | 0.04          | -0.069, 0.096 | 0.01          | 0.04          | -0.077, 0.088 |               |
| 1965 (ref)    | 0.00                          |         |               | 0.00           |              |               | 0.00           |               |               | 0.00          |               |               |               |               |
| 1966          | -0.01                         | 0.01    | -0.027, 0.005 | -0.01          | 0.01         | -0.025, 0.007 | -0.02          | 0.05          | -0.109, 0.071 | -0.01         | 0.05          | -0.105, 0.076 |               |               |
| 1967          | -0.01                         | 0.01    | -0.026, 0.004 | -0.01          | 0.01         | -0.022, 0.009 | -0.02          | 0.04          | -0.104, 0.064 | -0.01         | 0.04          | -0.092, 0.082 |               |               |
| Education     | Primary (<9 years)            | 0.00    |               |                | 0.00         |               |                |               |               |               |               |               |               |               |
|               | Primary (9 years)             | 0.00    |               |                | 0.00         |               |                |               |               |               |               |               |               |               |
|               | Secondary (10-11 years) (ref) | 0.00    |               |                | 0.00         |               |                |               |               |               |               |               |               |               |
|               | Secondary (12 years)          | -0.01   | 0.00          | -0.016, 0.002  | -0.01        | 0.00          | -0.016, 0.002  | -0.03         | 0.03          | -0.085, 0.023 | -0.03         | 0.03          | -0.085, 0.023 |               |
|               | Tertiary (13-15 years)        | -0.03   | 0.00          | -0.036, -0.019 | -0.03        | 0.00          | -0.036, -0.019 | -0.03         | 0.03          | -0.096, 0.035 | -0.03         | 0.03          | -0.096, 0.035 |               |
|               | Tertiary (15+ years)          | -0.03   | 0.01          | -0.039, -0.020 | -0.03        | 0.01          | -0.039, -0.020 | -0.06         | 0.03          | -0.116, 0.008 | -0.06         | 0.03          | -0.116, 0.008 |               |
| Post-graduate | Post-graduate                 | -0.01   | 0.01          | -0.034, 0.009  | -0.01        | 0.01          | -0.034, 0.009  | -0.06         | 0.09          | -0.238, 0.128 | -0.06         | 0.09          | -0.238, 0.128 |               |
|               | Missing                       | 0.05    | 0.05          | -0.056, 0.148  | 0.05         | 0.05          | -0.056, 0.148  | -0.11         | 0.17          | -0.444, 0.216 | -0.11         | 0.17          | -0.444, 0.216 |               |
|               | Missing                       | -0.01   | 0.00          | -0.013, -0.001 | -0.01        | 0.00          | -0.013, -0.001 | -0.03         | 0.02          | -0.056, 0.005 | -0.03         | 0.02          | -0.056, 0.005 |               |
| N             |                               | 163,246 |               | 163,246        |              | 23,107        |                | 23,107        |               | 23,107        |               | 23,107        |               |               |

TABLE S19. Linear regression: final parity regressed on IQ (continuous), no fixed effects with the sibling sample. Swedish men born 1951-1967.

| Variable    | Category                      | Model 1 |                |              | Model 2 |                |                |
|-------------|-------------------------------|---------|----------------|--------------|---------|----------------|----------------|
|             |                               | $\beta$ | SE             | 95% CI       | $\beta$ | SE             | 95% CI         |
| IQ          |                               | 0.030   | 0.002          | 0.027, 0.033 | 0.041   | 0.002          | 0.037, 0.044   |
| Birth Year  | 1951                          | 0.171   | 0.019          | 0.134, 0.207 | 0.100   | 0.019          | 0.062, 0.137   |
|             | 1952                          | 0.186   | 0.018          | 0.150, 0.222 | 0.117   | 0.019          | 0.080, 0.153   |
|             | 1953                          | 0.189   | 0.018          | 0.155, 0.224 | 0.131   | 0.018          | 0.096, 0.166   |
|             | 1954                          | 0.188   | 0.017          | 0.154, 0.221 | 0.136   | 0.017          | 0.101, 0.170   |
|             | 1955                          | 0.175   | 0.017          | 0.142, 0.209 | 0.131   | 0.017          | 0.097, 0.164   |
|             | 1956                          | 0.163   | 0.017          | 0.131, 0.196 | 0.123   | 0.017          | 0.091, 0.156   |
|             | 1957                          | 0.152   | 0.017          | 0.119, 0.184 | 0.117   | 0.017          | 0.085, 0.150   |
|             | 1958                          | 0.130   | 0.016          | 0.099, 0.162 | 0.103   | 0.016          | 0.071, 0.134   |
|             | 1959                          | 0.120   | 0.016          | 0.088, 0.152 | 0.094   | 0.016          | 0.062, 0.127   |
|             | 1961                          | 0.000   |                |              | 0.000   |                |                |
|             | 1962                          | 0.066   | 0.017          | 0.034, 0.099 | 0.049   | 0.017          | 0.017, 0.082   |
|             | 1963                          | 0.069   | 0.016          | 0.037, 0.101 | 0.054   | 0.016          | 0.022, 0.086   |
|             | 1964                          | 0.042   | 0.016          | 0.010, 0.073 | 0.032   | 0.016          | 0.000, 0.063   |
|             | 1965 (ref)                    | 0.048   | 0.016          | 0.016, 0.079 | 0.044   | 0.016          | 0.012, 0.075   |
| 1966        | -0.059                        | 0.017   | -0.093, -0.025 | -0.048       | 0.017   | -0.082, -0.015 |                |
| 1967        | -0.075                        | 0.017   | -0.109, -0.041 | -0.057       | 0.017   | -0.091, -0.023 |                |
| Education   | Primary (<9 years)            |         |                |              | 0.008   | 0.026          | -0.044, 0.059  |
|             | Primary (9 years)             |         |                |              | 0.018   | 0.009          | 0.000, 0.036   |
|             | Secondary (10-11 years) (ref) |         |                |              | 0.000   |                |                |
|             | Secondary (12 years)          |         |                |              | -0.088  | 0.010          | -0.108, -0.068 |
|             | Tertiary (13-15 years)        |         |                |              | -0.075  | 0.010          | -0.093, -0.056 |
|             | Tertiary (15+ years)          |         |                |              | -0.015  | 0.010          | -0.034, 0.005  |
|             | Post-graduate                 |         |                |              | 0.086   | 0.027          | 0.034, 0.138   |
|             | Missing                       |         |                |              | -0.226  | 0.101          | -0.425, -0.027 |
| Family Size | 2 (ref)                       |         |                |              | 0.000   |                |                |
|             | 3                             |         |                |              | 0.105   | 0.007          | 0.090, 0.119   |
|             | 4                             |         |                |              | 0.206   | 0.010          | 0.187, 0.225   |
|             | 5                             |         |                |              | 0.292   | 0.015          | 0.263, 0.321   |
|             | 6                             |         |                |              | 0.403   | 0.021          | 0.361, 0.444   |
| Birth Order | 1 (ref)                       |         |                |              | 0.000   |                |                |
|             | 2                             |         |                |              | -0.048  | 0.008          | -0.063, -0.033 |
|             | 3                             |         |                |              | -0.077  | 0.010          | -0.096, -0.057 |
|             | 4                             |         |                |              | -0.145  | 0.015          | -0.174, -0.115 |
|             | 5                             |         |                |              | -0.198  | 0.024          | -0.245, -0.151 |
|             | 6                             |         |                |              | -0.185  | 0.030          | -0.244, -0.126 |
| N           |                               |         | 195,499        |              |         | 195,499        |                |

TABLE S20. Linear regression: final parity regressed on IQ (categorical), no fixed effects with the sibling sample. Swedish men born 1951-1967.

| Variable    | Category                      | Model 1 |                |                | Model 2 |                |                |
|-------------|-------------------------------|---------|----------------|----------------|---------|----------------|----------------|
|             |                               | $\beta$ | SE             | 95% CI         | $\beta$ | SE             | 95% CI         |
| IQ          | Below 74                      | -0.384  | 0.020          | -0.423, -0.344 | -0.420  | 0.020          | -0.460, -0.380 |
|             | 74 to 81                      | -0.139  | 0.014          | -0.166, -0.112 | -0.166  | 0.014          | -0.193, -0.138 |
|             | 81 to 89                      | -0.045  | 0.011          | -0.067, -0.023 | -0.062  | 0.011          | -0.084, -0.039 |
|             | 89 to 96                      | -0.028  | 0.010          | -0.048, -0.009 | -0.037  | 0.010          | -0.057, -0.017 |
|             | 96 to 104 (ref)               | 0.000   |                |                | 0.000   |                |                |
|             | 104 to 111                    | -0.007  | 0.010          | -0.026, 0.012  | 0.000   | 0.010          | -0.019, 0.019  |
|             | 111 to 119                    | 0.017   | 0.011          | -0.004, 0.038  | 0.025   | 0.011          | 0.004, 0.046   |
|             | 119 to 126                    | 0.030   | 0.013          | 0.006, 0.055   | 0.034   | 0.013          | 0.008, 0.060   |
|             | Above 126                     | 0.028   | 0.016          | -0.004, 0.060  | 0.017   | 0.017          | -0.016, 0.050  |
|             | Not Tested                    | -0.869  | 0.023          | -0.914, -0.825 | -0.843  | 0.023          | -0.889, -0.798 |
|             | Missing                       | -0.185  | 0.020          | -0.224, -0.146 | -0.188  | 0.020          | -0.226, -0.149 |
| Birth Year  | 1951                          | 0.200   | 0.018          | 0.164, 0.236   | 0.135   | 0.019          | 0.098, 0.172   |
|             | 1952                          | 0.212   | 0.018          | 0.177, 0.248   | 0.147   | 0.018          | 0.112, 0.183   |
|             | 1953                          | 0.212   | 0.017          | 0.177, 0.246   | 0.155   | 0.018          | 0.120, 0.189   |
|             | 1954                          | 0.203   | 0.017          | 0.170, 0.237   | 0.154   | 0.017          | 0.120, 0.188   |
|             | 1955                          | 0.196   | 0.017          | 0.164, 0.229   | 0.153   | 0.017          | 0.121, 0.186   |
|             | 1956                          | 0.178   | 0.016          | 0.145, 0.210   | 0.140   | 0.016          | 0.107, 0.172   |
|             | 1957                          | 0.169   | 0.016          | 0.137, 0.201   | 0.136   | 0.016          | 0.104, 0.168   |
|             | 1958                          | 0.148   | 0.016          | 0.117, 0.180   | 0.121   | 0.016          | 0.090, 0.153   |
|             | 1959                          | 0.131   | 0.016          | 0.099, 0.163   | 0.106   | 0.016          | 0.074, 0.137   |
|             | 1961                          | 0.000   |                |                | 0.000   |                |                |
|             | 1962                          | 0.101   | 0.016          | 0.070, 0.133   | 0.084   | 0.016          | 0.053, 0.116   |
|             | 1963                          | 0.079   | 0.016          | 0.047, 0.110   | 0.063   | 0.016          | 0.032, 0.095   |
|             | 1964                          | 0.053   | 0.016          | 0.021, 0.084   | 0.041   | 0.016          | 0.010, 0.072   |
|             | 1965 (ref)                    | 0.061   | 0.016          | 0.030, 0.092   | 0.057   | 0.016          | 0.026, 0.088   |
| 1966        | -0.053                        | 0.017   | -0.086, -0.020 | -0.043         | 0.017   | -0.076, -0.010 |                |
| 1967        | -0.068                        | 0.017   | -0.101, -0.035 | -0.051         | 0.017   | -0.084, -0.018 |                |
| Education   | Primary (<9 years)            |         |                |                | -0.056  | 0.025          | -0.104, -0.008 |
|             | Primary (9 years)             |         |                |                | 0.000   | 0.009          | -0.018, 0.017  |
|             | Secondary (10-11 years) (ref) |         |                |                | 0.000   |                |                |
|             | Secondary (12 years)          |         |                |                | -0.077  | 0.010          | -0.096, -0.057 |
|             | Tertiary (13-15 years)        |         |                |                | -0.047  | 0.009          | -0.065, -0.028 |
|             | Tertiary (15+ years)          |         |                |                | 0.025   | 0.010          | 0.006, 0.044   |
|             | Post-graduate                 |         |                |                | 0.158   | 0.026          | 0.106, 0.209   |
|             | Missing                       |         |                |                | -0.773  | 0.054          | -0.878, -0.667 |
| Family Size | 2 (ref)                       |         |                |                | 0.000   |                |                |
|             | 3                             |         |                |                | 0.107   | 0.007          | 0.093, 0.121   |
|             | 4                             |         |                |                | 0.209   | 0.010          | 0.191, 0.228   |
|             | 5                             |         |                |                | 0.296   | 0.015          | 0.268, 0.324   |
|             | 6                             |         |                |                | 0.416   | 0.021          | 0.375, 0.456   |
|             | 7                             |         |                |                | 0.536   | 0.029          | 0.478, 0.594   |
| Birth Order | 1 (ref)                       |         |                |                | 0.000   |                |                |
|             | 2                             |         |                |                | -0.047  | 0.008          | -0.062, -0.032 |
|             | 3                             |         |                |                | -0.080  | 0.010          | -0.099, -0.061 |
|             | 4                             |         |                |                | -0.144  | 0.015          | -0.173, -0.116 |
|             | 5                             |         |                |                | -0.201  | 0.023          | -0.247, -0.155 |
|             | 6                             |         |                |                | -0.192  | 0.029          | -0.250, -0.135 |
| N           |                               |         | 205,685        |                |         | 205,685        |                |

TABLE S21. Linear regression: parity progression regressed on IQ (categorical), no fixed effects with the sibling sample. Swedish men born 1951-1967.

|            |                               | Childless |                |                |         |                |                |         |                |                |         |                |                |         |               |                |               |
|------------|-------------------------------|-----------|----------------|----------------|---------|----------------|----------------|---------|----------------|----------------|---------|----------------|----------------|---------|---------------|----------------|---------------|
|            |                               | 1 → 2     |                |                |         | 2 → 3          |                |         |                |                |         |                |                |         |               |                |               |
| Variable   | Category                      | Model 1   |                |                | Model 2 |                |                | Model 1 |                |                | Model 2 |                |                |         |               |                |               |
|            |                               | β         | SE             | 95% CI         | β       | SE             | 95% CI         | β       | SE             | 95% CI         | β       | SE             | 95% CI         |         |               |                |               |
| IQ         | Below 74                      | 0.17      | 0.01           | 0.153, 0.177   | -0.06   | 0.01           | -0.076, -0.049 | -0.07   | 0.01           | -0.079, -0.051 | 0.03    | 0.01           | 0.008, 0.044   | 0.01    | 0.008, 0.044  | 0.01           | -0.012, 0.025 |
|            | 74 to 81                      | 0.07      | 0.00           | 0.059, 0.074   | -0.04   | 0.00           | -0.044, -0.027 | -0.04   | 0.00           | -0.046, -0.028 | 0.03    | 0.01           | 0.020, 0.044   | 0.02    | 0.01          | 0.005, 0.030   |               |
|            | 81 to 89                      | 0.02      | 0.00           | 0.015, 0.028   | -0.02   | 0.00           | -0.027, -0.013 | -0.02   | 0.00           | -0.027, -0.012 | 0.02    | 0.01           | 0.006, 0.026   | 0.01    | 0.01          | -0.004, 0.017  |               |
|            | 89 to 96                      | 0.01      | 0.00           | 0.004, 0.016   | -0.01   | 0.00           | -0.016, -0.003 | -0.01   | 0.00           | -0.016, -0.003 | 0.00    | 0.00           | -0.005, 0.014  | 0.00    | 0.00          | -0.010, 0.008  |               |
|            | 96 to 104 (ref)               | 0.00      | 0.00           |                | 0.00    | 0.00           |                | 0.00    | 0.00           |                | 0.00    | 0.00           |                | 0.00    | 0.00          |                |               |
|            | 104 to 111                    | 0.00      | 0.00           | -0.005, 0.006  | 0.00    | 0.00           | -0.004, 0.007  | 0.01    | 0.00           | 0.000, 0.012   | -0.01   | 0.00           | -0.014, 0.003  | 0.00    | 0.00          | -0.009, 0.009  |               |
|            | 111 to 119                    | 0.00      | 0.00           | -0.008, 0.005  | 0.00    | 0.00           | -0.005, 0.007  | 0.02    | 0.00           | 0.012, 0.025   | 0.00    | 0.00           | -0.012, 0.007  | 0.01    | 0.01          | -0.003, 0.017  |               |
|            | 119 to 126                    | 0.00      | 0.00           | -0.009, 0.006  | 0.00    | 0.00           | -0.004, 0.011  | 0.03    | 0.00           | 0.009, 0.026   | 0.01    | 0.01           | -0.003, 0.020  | 0.02    | 0.01          | 0.008, 0.032   |               |
|            | Above 126                     | 0.01      | 0.00           | -0.001, 0.018  | 0.02    | 0.01           | 0.007, 0.027   | 0.03    | 0.01           | 0.009, 0.030   | 0.02    | 0.01           | 0.007, 0.035   | 0.03    | 0.01          | 0.015, 0.045   |               |
| Birth Year | Not Tested                    | 0.35      | 0.01           | 0.337, 0.368   | 0.33    | 0.01           | 0.319, 0.350   | -0.06   | 0.01           | -0.082, -0.044 | 0.02    | 0.01           | -0.085, -0.047 | 0.01    | 0.01          | -0.013, 0.038  |               |
|            | Missing                       | 0.08      | 0.01           | 0.072, 0.096   | 0.08    | 0.01           | 0.071, 0.095   | -0.01   | 0.01           | -0.028, -0.001 | 0.02    | 0.01           | -0.031, -0.004 | 0.02    | 0.01          | 0.000, 0.036   |               |
|            | 1951                          | -0.04     | 0.01           | -0.046, -0.025 | -0.03   | 0.01           | -0.040, -0.018 | 0.02    | 0.01           | 0.004, 0.027   | 0.01    | 0.01           | -0.004, 0.020  | 0.07    | 0.01          | 0.031, 0.064   |               |
|            | 1952                          | -0.04     | 0.01           | -0.050, -0.029 | -0.03   | 0.01           | -0.043, -0.022 | 0.01    | 0.01           | 0.002, 0.025   | 0.01    | 0.01           | -0.006, 0.017  | 0.08    | 0.01          | 0.044, 0.076   |               |
|            | 1953                          | -0.04     | 0.01           | -0.045, -0.025 | -0.03   | 0.01           | -0.038, -0.018 | 0.02    | 0.01           | 0.013, 0.035   | 0.02    | 0.01           | 0.006, 0.028   | 0.08    | 0.01          | 0.047, 0.078   |               |
|            | 1954                          | -0.04     | 0.01           | -0.049, -0.029 | -0.03   | 0.01           | -0.043, -0.023 | 0.02    | 0.01           | 0.006, 0.028   | 0.01    | 0.01           | 0.000, 0.022   | 0.09    | 0.01          | 0.052, 0.083   |               |
|            | 1955                          | -0.03     | 0.00           | -0.043, -0.024 | -0.03   | 0.00           | -0.038, -0.019 | 0.02    | 0.01           | 0.007, 0.029   | 0.01    | 0.01           | 0.002, 0.024   | 0.08    | 0.01          | 0.053, 0.084   |               |
|            | 1956                          | -0.03     | 0.00           | -0.035, -0.016 | -0.02   | 0.00           | -0.031, -0.012 | 0.03    | 0.01           | 0.015, 0.037   | 0.02    | 0.01           | 0.011, 0.032   | 0.08    | 0.01          | 0.054, 0.084   |               |
|            | 1957                          | -0.02     | 0.00           | -0.033, -0.013 | -0.02   | 0.00           | -0.029, -0.009 | 0.03    | 0.01           | 0.018, 0.040   | 0.03    | 0.01           | 0.015, 0.036   | 0.07    | 0.01          | 0.049, 0.078   |               |
|            | 1958                          | -0.02     | 0.00           | -0.034, -0.015 | -0.02   | 0.00           | -0.030, -0.011 | 0.03    | 0.01           | 0.016, 0.037   | 0.02    | 0.01           | 0.013, 0.034   | 0.06    | 0.01          | 0.039, 0.069   |               |
|            | 1959                          | -0.02     | 0.00           | -0.032, -0.013 | -0.02   | 0.00           | -0.029, -0.009 | 0.02    | 0.01           | 0.007, 0.028   | 0.01    | 0.01           | 0.004, 0.026   | 0.06    | 0.01          | 0.034, 0.064   |               |
|            | 1961                          | 0.00      | 0.00           |                | 0.00    | 0.00           |                | 0.00    | 0.00           |                | 0.00    | 0.00           |                | 0.00    | 0.00          |                |               |
|            | 1962                          | -0.02     | 0.00           | -0.026, -0.007 | -0.01   | 0.00           | -0.023, -0.004 | 0.01    | 0.01           | 0.004, 0.025   | 0.01    | 0.01           | 0.003, 0.024   | 0.04    | 0.01          | 0.026, 0.056   |               |
|            | 1963                          | -0.01     | 0.00           | -0.021, -0.001 | -0.01   | 0.00           | -0.018, 0.001  | 0.01    | 0.01           | 0.003, 0.024   | 0.01    | 0.01           | 0.001, 0.023   | 0.04    | 0.01          | 0.022, 0.052   |               |
| 1964       | -0.01                         | 0.00      | -0.018, 0.001  | -0.01          | 0.00    | -0.016, 0.003  | 0.01           | 0.01    | -0.002, 0.019  | 0.01           | 0.01    | -0.003, 0.019  | 0.03           | 0.01    | 0.011, 0.041  |                |               |
| 1965 (ref) | -0.01                         | 0.00      | -0.023, -0.004 | -0.01          | 0.00    | -0.022, -0.003 | 0.01           | 0.01    | -0.005, 0.016  | 0.01           | 0.01    | -0.005, 0.016  | 0.03           | 0.01    | 0.011, 0.041  |                |               |
| 1966       | 0.01                          | 0.01      | -0.001, 0.020  | 0.01           | 0.01    | -0.003, 0.018  | -0.01          | 0.01    | -0.026, -0.003 | -0.01          | 0.01    | -0.025, -0.002 | -0.01          | 0.01    | -0.018, 0.014 |                |               |
| 1967       | 0.01                          | 0.01      | -0.001, 0.021  | 0.01           | 0.01    | -0.003, 0.018  | -0.01          | 0.01    | -0.025, -0.001 | -0.01          | 0.01    | -0.030, 0.003  | -0.01          | 0.01    | -0.023, 0.010 |                |               |
| Education  | Primary (<9 years)            | 0.03      | 0.01           | 0.020, 0.048   | 0.03    | 0.01           | 0.020, 0.048   | 0.00    | 0.01           | -0.012, 0.019  | 0.02    | 0.01           | 0.043, 0.073   | 0.05    | 0.01          | -0.002, 0.041  |               |
|            | Primary (9 years)             | 0.01      | 0.00           | 0.006, 0.016   | 0.01    | 0.00           | 0.006, 0.016   | 0.00    | 0.00           | -0.003, 0.009  | 0.01    | 0.00           | 0.026, 0.056   | 0.04    | 0.01          | 0.020, 0.050   |               |
|            | Secondary (10-11 years) (ref) | 0.00      | 0.00           |                | 0.00    | 0.00           |                | 0.00    | 0.00           |                | 0.00    |                |                | 0.00    | 0.00          |                |               |
|            | Secondary (12 years)          | 0.02      | 0.00           | 0.015, 0.027   | 0.02    | 0.00           | 0.015, 0.027   | 0.00    | 0.00           | -0.005, 0.008  | 0.00    | 0.00           | -0.005, 0.008  | -0.02   | 0.00          | -0.025, -0.006 |               |
|            | Tertiary (13-15 years)        | 0.00      | 0.00           | -0.005, 0.006  | 0.00    | 0.00           | -0.005, 0.006  | 0.01    | 0.00           | 0.005, 0.017   | 0.01    | 0.00           | 0.023, 0.035   | -0.03   | 0.00          | -0.043, -0.026 |               |
|            | Tertiary (15+ years)          | -0.01     | 0.00           | -0.015, -0.003 | -0.01   | 0.00           | -0.015, -0.003 | 0.03    | 0.00           | 0.023, 0.035   | 0.03    | 0.00           | 0.023, 0.035   | -0.01   | 0.00          | -0.017, 0.001  |               |
|            | Post-graduate                 | -0.04     | 0.01           | -0.052, -0.023 | -0.04   | 0.01           | -0.052, -0.023 | 0.04    | 0.01           | 0.028, 0.059   | 0.04    | 0.01           | 0.028, 0.059   | 0.02    | 0.01          | -0.001, 0.045  |               |
|            | Missing                       | 0.33      | 0.02           | 0.290, 0.361   | 0.33    | 0.02           | 0.290, 0.361   | -0.04   | 0.03           | -0.109, 0.024  | -0.04   | 0.03           | -0.109, 0.024  | 0.01    | 0.05          | -0.078, 0.101  |               |
|            | Family Size                   | 2 (ref)   | 0.00           | 0.00           |         | 0.00           | 0.00           | 0.00    | 0.00           |                | 0.00    | 0.00           |                | 0.00    | 0.00          |                |               |
|            | 3                             | -0.02     | 0.00           | -0.024, -0.016 | -0.02   | 0.00           | -0.024, -0.016 | 0.02    | 0.00           | 0.017, 0.027   | 0.02    | 0.00           | 0.017, 0.027   | 0.02    | 0.00          | 0.017, 0.029   |               |
|            | 4                             | -0.03     | 0.00           | -0.038, -0.028 | -0.03   | 0.00           | -0.038, -0.028 | 0.04    | 0.00           | 0.030, 0.042   | 0.04    | 0.00           | 0.030, 0.042   | 0.06    | 0.00          | 0.051, 0.066   |               |
|            | 5                             | -0.04     | 0.00           | -0.052, -0.037 | -0.04   | 0.00           | -0.052, -0.037 | 0.05    | 0.00           | 0.040, 0.056   | 0.05    | 0.00           | 0.040, 0.056   | 0.07    | 0.01          | 0.064, 0.086   |               |
|            | 6                             | -0.05     | 0.01           | -0.061, -0.042 | -0.05   | 0.01           | -0.061, -0.042 | 0.06    | 0.01           | 0.051, 0.072   | 0.06    | 0.01           | 0.051, 0.072   | 0.11    | 0.01          | 0.095, 0.124   |               |
|            | Birth Order                   | 1 (ref)   | 0.00           | 0.00           |         | 0.00           | 0.00           |         | 0.00           | 0.00           |         | 0.00           |                | 0.00    | 0.00          |                |               |
| 2          |                               | 0.01      | 0.00           | 0.003, 0.013   | 0.01    | 0.00           | 0.003, 0.013   | 0.00    | 0.00           | -0.009, 0.001  | 0.00    | 0.00           | -0.009, 0.001  | -0.02   | 0.00          | -0.026, -0.011 |               |
| 3          |                               | 0.02      | 0.00           | 0.011, 0.023   | 0.02    | 0.00           | 0.011, 0.023   | 0.00    | 0.00           | -0.011, 0.002  | 0.00    | 0.00           | -0.011, 0.002  | -0.03   | 0.00          | -0.035, -0.018 |               |
| 4          |                               | 0.02      | 0.00           | 0.017, 0.033   | 0.02    | 0.00           | 0.017, 0.033   | -0.01   | 0.00           | -0.019, -0.001 | 0.00    | 0.00           | -0.019, -0.001 | -0.05   | 0.01          | -0.065, -0.039 |               |
| 5          |                               | 0.03      | 0.01           | 0.016, 0.042   | 0.03    | 0.01           | 0.016, 0.042   | -0.03   | 0.01           | -0.041, -0.013 | -0.03   | 0.01           | -0.041, -0.013 | -0.06   | 0.01          | -0.077, -0.037 |               |
| 6          |                               | 0.03      | 0.01           | 0.016, 0.046   | 0.03    | 0.01           | 0.016, 0.046   | -0.01   | 0.01           | -0.022, 0.009  | -0.01   | 0.01           | -0.022, 0.009  | -0.05   | 0.01          | -0.077, -0.031 |               |
| N          |                               | 205,685   |                | 205,685        |         | 163,246        |                | 163,246 |                | 163,246        |         | 131,953        |                | 131,953 |               |                |               |

TABLE S22. Linear regression: parity progression regressed on IQ (categorical), no fixed effects with the sibling sample. Swedish men born 1951-1967.

| Variable      | Category                      | 3 → 4   |                |                |         |                | 4 → 5          |         |                |                |         | 5 → 6+        |                |         |               |                |       |               |                |
|---------------|-------------------------------|---------|----------------|----------------|---------|----------------|----------------|---------|----------------|----------------|---------|---------------|----------------|---------|---------------|----------------|-------|---------------|----------------|
|               |                               | Model 1 |                | Model 2        |         |                | Model 1        |         | Model 2        |                |         | Model 1       |                | Model 2 |               |                |       |               |                |
|               |                               | $\beta$ | SE             | 95% CI         | $\beta$ | SE             | 95% CI         | $\beta$ | SE             | 95% CI         | $\beta$ | SE            | 95% CI         | $\beta$ | SE            | 95% CI         |       |               |                |
| IQ            | Below 74                      | 0.09    | 0.01           | 0.063, 0.113   | 0.06    | 0.01           | 0.038, 0.088   | 0.14    | 0.02           | 0.099, 0.178   | 0.11    | 0.02          | 0.071, 0.151   | 0.15    | 0.03          | 0.089, 0.217   | 0.13  | 0.03          | 0.070, 0.199   |
|               | 74 to 81                      | 0.06    | 0.01           | 0.041, 0.074   | 0.04    | 0.01           | 0.021, 0.054   | 0.07    | 0.01           | 0.039, 0.092   | 0.04    | 0.01          | 0.017, 0.071   | 0.06    | 0.02          | 0.017, 0.111   | 0.05  | 0.02          | 0.004, 0.099   |
|               | 81 to 89                      | 0.03    | 0.01           | 0.014, 0.041   | 0.01    | 0.01           | 0.001, 0.028   | 0.02    | 0.01           | 0.000, 0.045   | 0.01    | 0.01          | -0.015, 0.031  | 0.02    | 0.02          | -0.020, 0.066  | 0.02  | 0.02          | -0.026, 0.060  |
|               | 89 to 96                      | 0.01    | 0.01           | 0.001, 0.025   | 0.00    | 0.01           | -0.008, 0.016  | 0.00    | 0.01           | -0.025, 0.017  | -0.01   | 0.01          | -0.035, 0.007  | 0.00    | 0.02          | -0.035, 0.044  | 0.00  | 0.02          | -0.041, 0.038  |
|               | 96 to 104 (ref)               | 0.00    |                |                | 0.00    |                |                | 0.00    |                |                | 0.00    |               |                | 0.00    |               |                | 0.00  |               |                |
|               | 104 to 111                    | -0.02   | 0.01           | -0.027, -0.003 | -0.01   | 0.01           | -0.017, 0.006  | -0.02   | 0.01           | -0.043, -0.002 | -0.01   | 0.01          | -0.032, 0.009  | -0.02   | 0.02          | -0.058, 0.021  | -0.02 | 0.02          | -0.055, 0.025  |
| 111 to 119    | -0.03                         | 0.01    | -0.046, -0.021 | -0.01          | 0.01    | -0.027, -0.002 | -0.02          | 0.01    | -0.040, 0.006  | 0.00           | 0.01    | -0.019, 0.027 | 0.01           | 0.02    | -0.033, 0.058 | 0.02           | 0.02  | -0.026, 0.066 |                |
| 119 to 126    | -0.03                         | 0.01    | -0.041, -0.012 | 0.00           | 0.01    | -0.015, 0.016  | -0.04          | 0.01    | -0.065, -0.013 | -0.01          | 0.01    | -0.033, 0.021 | 0.02           | 0.03    | -0.040, 0.070 | 0.03           | 0.03  | -0.027, 0.088 |                |
| Above 126     | -0.03                         | 0.01    | -0.046, -0.008 | 0.00           | 0.01    | -0.017, 0.022  | -0.03          | 0.02    | -0.067, -0.001 | 0.01           | 0.01    | -0.025, 0.045 | -0.05          | 0.03    | -0.111, 0.021 | -0.03          | 0.04  | -0.099, 0.043 |                |
| Not Tested    | 0.06                          | 0.02    | 0.022, 0.092   | 0.05           | 0.02    | 0.018, 0.087   | 0.05           | 0.03    | 0.007, 0.101   | 0.04           | 0.03    | -0.016, 0.092 | 0.02           | 0.05    | -0.077, 0.112 | 0.01           | 0.05  | -0.083, 0.107 |                |
| Missing       | 0.01                          | 0.01    | -0.014, 0.035  | 0.01           | 0.01    | -0.011, 0.037  | 0.02           | 0.02    | -0.027, 0.057  | 0.02           | 0.02    | -0.025, 0.057 | 0.07           | 0.04    | -0.011, 0.154 | 0.06           | 0.04  | -0.018, 0.146 |                |
| Birth Year    | 1951                          | 0.04    | 0.01           | 0.021, 0.066   | 0.03    | 0.01           | 0.004, 0.049   | 0.06    | 0.02           | 0.019, 0.094   | 0.04    | 0.02          | 0.005, 0.082   | 0.04    | 0.04          | -0.028, 0.111  | 0.02  | 0.04          | -0.051, 0.090  |
|               | 1952                          | 0.04    | 0.01           | 0.020, 0.064   | 0.02    | 0.01           | 0.002, 0.046   | 0.03    | 0.02           | -0.003, 0.070  | 0.02    | 0.02          | -0.015, 0.061  | 0.04    | 0.04          | -0.026, 0.113  | 0.03  | 0.04          | -0.039, 0.101  |
|               | 1953                          | 0.05    | 0.01           | 0.024, 0.066   | 0.03    | 0.01           | 0.011, 0.053   | 0.00    | 0.02           | -0.031, 0.040  | -0.01   | 0.02          | -0.041, 0.030  | 0.03    | 0.03          | -0.036, 0.101  | 0.01  | 0.04          | -0.056, 0.083  |
|               | 1954                          | 0.02    | 0.01           | 0.003, 0.044   | 0.01    | 0.01           | -0.011, 0.031  | 0.03    | 0.02           | -0.008, 0.063  | 0.02    | 0.02          | -0.019, 0.053  | 0.03    | 0.03          | -0.043, 0.093  | 0.01  | 0.03          | -0.060, 0.077  |
|               | 1955                          | 0.03    | 0.01           | 0.008, 0.048   | 0.02    | 0.01           | -0.003, 0.038  | 0.01    | 0.02           | 0.021, 0.049   | 0.01    | 0.02          | -0.026, 0.043  | 0.05    | 0.03          | -0.020, 0.113  | 0.04  | 0.03          | -0.029, 0.105  |
|               | 1956                          | 0.02    | 0.01           | -0.001, 0.039  | 0.01    | 0.01           | -0.012, 0.028  | 0.00    | 0.02           | -0.039, 0.030  | -0.01   | 0.02          | -0.047, 0.021  | 0.01    | 0.03          | -0.052, 0.081  | 0.01  | 0.03          | -0.060, 0.073  |
| 1957          | 0.02                          | 0.01    | -0.001, 0.039  | 0.01           | 0.01    | -0.010, 0.030  | 0.01           | 0.02    | -0.026, 0.043  | 0.00           | 0.02    | -0.031, 0.038 | 0.03           | 0.03    | -0.036, 0.097 | 0.02           | 0.03  | -0.046, 0.088 |                |
| 1958          | 0.00                          | 0.01    | -0.016, 0.024  | 0.00           | 0.01    | -0.023, 0.016  | 0.01           | 0.02    | -0.027, 0.042  | 0.00           | 0.02    | -0.033, 0.036 | -0.02          | 0.03    | -0.085, 0.046 | -0.03          | 0.03  | -0.094, 0.038 |                |
| 1959          | 0.01                          | 0.01    | -0.009, 0.031  | 0.00           | 0.01    | -0.015, 0.025  | 0.00           | 0.02    | -0.031, 0.039  | 0.00           | 0.02    | -0.035, 0.034 | 0.00           | 0.03    | -0.066, 0.069 | 0.00           | 0.03  | -0.072, 0.062 |                |
| 1961          | 0.00                          |         |                | 0.00           |         |                | 0.00           |         |                | 0.00           |         |               | 0.00           |         |               | 0.00           |       |               |                |
| 1962          | 0.02                          | 0.01    | 0.002, 0.042   | 0.02           | 0.01    | -0.003, 0.038  | 0.00           | 0.02    | -0.036, 0.034  | 0.00           | 0.02    | -0.037, 0.033 | 0.03           | 0.03    | -0.033, 0.102 | 0.03           | 0.03  | -0.033, 0.101 |                |
| 1963          | 0.00                          | 0.01    | -0.017, 0.023  | 0.00           | 0.01    | -0.021, 0.020  | 0.01           | 0.02    | -0.026, 0.044  | 0.01           | 0.02    | -0.027, 0.044 | 0.02           | 0.03    | -0.047, 0.088 | 0.02           | 0.03  | -0.051, 0.085 |                |
| 1964          | -0.01                         | 0.01    | -0.028, 0.012  | -0.01          | 0.01    | -0.030, 0.010  | 0.01           | 0.02    | -0.027, 0.044  | 0.01           | 0.02    | -0.027, 0.044 | -0.01          | 0.03    | -0.073, 0.063 | -0.01          | 0.03  | -0.075, 0.060 |                |
| 1965 (ref)    | 0.00                          | 0.01    | -0.023, 0.017  | 0.00           | 0.01    | -0.023, 0.017  | 0.00           | 0.02    | -0.040, 0.031  | 0.00           | 0.02    | -0.038, 0.032 | 0.03           | 0.04    | -0.039, 0.099 | 0.03           | 0.04  | -0.037, 0.101 |                |
| 1966          | -0.02                         | 0.01    | -0.046, -0.002 | -0.02          | 0.01    | -0.042, 0.002  | 0.01           | 0.02    | -0.028, 0.053  | 0.02           | 0.02    | -0.025, 0.055 | 0.00           | 0.04    | -0.079, 0.071 | 0.00           | 0.04  | -0.076, 0.075 |                |
| 1967          | -0.04                         | 0.01    | -0.062, -0.017 | -0.03          | 0.01    | -0.056, -0.011 | -0.03          | 0.02    | -0.070, 0.010  | -0.03          | 0.02    | -0.066, 0.015 | 0.06           | 0.04    | -0.027, 0.142 | 0.07           | 0.04  | -0.018, 0.151 |                |
| Education     | Primary (<9 years)            | -0.01   | 0.01           | -0.040, 0.016  | -0.01   | 0.01           | 0.001, 0.022   |         |                |                | 0.01    | 0.02          | -0.031, 0.061  |         |               |                | 0.01  | 0.04          | -0.069, 0.090  |
|               | Primary (9 years)             | 0.00    |                |                | 0.01    | 0.01           |                |         |                | 0.02           | 0.01    |               | 0.00           | 0.02    |               | 0.00           | 0.02  |               |                |
|               | Secondary (10-11 years) (ref) | 0.00    |                |                | -0.02   | 0.01           | -0.035, -0.011 | -0.02   | 0.01           | -0.040, 0.003  | -0.02   | 0.01          | -0.040, 0.003  | -0.04   | 0.02          | -0.058, 0.021  | -0.04 | 0.02          | -0.083, -0.001 |
|               | Secondary (12 years)          | -0.05   | 0.01           | -0.063, -0.040 | -0.05   | 0.01           | -0.063, -0.040 | -0.05   | 0.01           | -0.070, -0.030 | -0.05   | 0.01          | -0.070, -0.030 | -0.04   | 0.02          | -0.079, 0.061  | -0.04 | 0.02          | -0.085, 0.003  |
|               | Tertiary (13-15 years)        | -0.05   | 0.01           | -0.057, -0.034 | -0.05   | 0.01           | -0.057, -0.034 | -0.06   | 0.01           | -0.079, -0.038 | -0.06   | 0.01          | -0.079, -0.038 | -0.04   | 0.02          | -0.085, 0.003  | -0.04 | 0.02          | -0.085, 0.003  |
|               | Tertiary (15+ years)          | -0.01   | 0.02           | -0.042, 0.017  | -0.01   | 0.02           | -0.042, 0.017  | -0.07   | 0.02           | -0.114, -0.018 | -0.07   | 0.02          | -0.114, -0.018 | -0.01   | 0.06          | -0.071, 0.096  | -0.01 | 0.06          | -0.123, 0.096  |
| Post-graduate | 0.12                          | 0.06    | -0.005, 0.241  |                |         |                | -0.05          | 0.08    | -0.212, 0.112  |                |         |               | -0.20          | 0.13    | -0.448, 0.056 |                |       |               |                |
| Missing       | 0.00                          |         |                | 0.00           |         |                | 0.00           |         |                | 0.00           |         |               | 0.00           |         |               | 0.00           |       |               |                |
| Family Size   | 2 (ref)                       | 0.00    |                |                | 0.00    |                |                |         |                | 0.00           |         |               | 0.00           |         |               | 0.00           |       |               |                |
|               | 3                             | 0.02    | 0.00           | 0.007, 0.025   | 0.02    | 0.00           | 0.007, 0.025   | 0.02    | 0.02           | 0.000, 0.034   | 0.02    | 0.01          | 0.001, 0.034   | 0.06    | 0.02          | 0.026, 0.091   | 0.06  | 0.02          | 0.026, 0.091   |
| 4             | 0.05                          | 0.01    | 0.040, 0.062   | 0.05           | 0.01    | 0.040, 0.062   | 0.02           | 0.01    | 0.003, 0.041   | 0.02           | 0.01    | 0.003, 0.041  | 0.05           | 0.02    | 0.016, 0.090  | 0.05           | 0.02  | 0.016, 0.090  |                |
| 5             | 0.07                          | 0.01    | 0.055, 0.087   | 0.07           | 0.01    | 0.055, 0.087   | 0.06           | 0.01    | 0.037, 0.091   | 0.06           | 0.01    | 0.037, 0.091  | 0.11           | 0.03    | 0.061, 0.160  | 0.11           | 0.03  | 0.061, 0.160  |                |
| 6             | 0.12                          | 0.01    | 0.103, 0.143   | 0.12           | 0.01    | 0.103, 0.143   | 0.10           | 0.02    | 0.069, 0.133   | 0.10           | 0.02    | 0.069, 0.133  | 0.14           | 0.03    | 0.086, 0.200  | 0.14           | 0.03  | 0.086, 0.200  |                |
| Birth Order   | 1 (ref)                       | 0.00    |                |                | 0.00    |                |                |         |                | 0.00           |         |               | 0.00           |         |               | 0.00           |       |               |                |
|               | 2                             | -0.02   | 0.00           | -0.025, -0.007 | -0.02   | 0.00           | -0.025, -0.007 | -0.01   | 0.01           | -0.019, 0.012  | -0.01   | 0.01          | -0.019, 0.012  | -0.01   | 0.02          | -0.042, 0.018  | -0.01 | 0.02          | -0.042, 0.018  |
|               | 3                             | -0.02   | 0.01           | -0.027, -0.004 | -0.03   | 0.01           | -0.048, -0.013 | -0.01   | 0.01           | -0.024, 0.014  | -0.01   | 0.01          | -0.024, 0.014  | -0.03   | 0.02          | -0.064, 0.011  | -0.03 | 0.02          | -0.064, 0.011  |
|               | 4                             | -0.03   | 0.01           | -0.048, -0.013 | -0.03   | 0.01           | -0.048, -0.013 | -0.03   | 0.01           | -0.041, 0.015  | -0.03   | 0.01          | -0.041, 0.015  | -0.06   | 0.03          | -0.112, -0.008 | -0.06 | 0.03          | -0.112, -0.008 |
|               | 5                             | -0.05   | 0.01           | -0.072, -0.019 | -0.05   | 0.01           | -0.072, -0.019 | -0.03   | 0.02           | -0.072, 0.013  | -0.03   | 0.02          | -0.072, 0.013  | -0.06   | 0.04          | -0.138, 0.013  | -0.06 | 0.04          | -0.138, 0.013  |
|               | 6                             | -0.06   | 0.02           | -0.093, -0.032 | -0.06   | 0.02           | -0.093, -0.032 | -0.03   | 0.02           | -0.080, 0.017  | -0.03   | 0.02          | -0.080, 0.017  | -0.02   | 0.04          | -0.106, 0.063  | -0.02 | 0.04          | -0.106, 0.063  |
| N             |                               | 65,195  |                | 65,195         |         | 20,638         |                | 20,638  |                | 20,638         |         | 5,776         |                | 5,776   |               | 5,776          |       | 5,776         |                |

TABLE S23. Linear regression: progression to two ( $1 \rightarrow 2$ ) or three or more ( $2 \rightarrow 3+$ ) childbearing partners regressed on IQ (categorical), no fixed effects with the sibling sample. Swedish men born 1951-1967.

| Variable               | Category                      | $1 \rightarrow 2$ |       |                |         |                | $2 \rightarrow 3$ |         |         |                |         |                |                |
|------------------------|-------------------------------|-------------------|-------|----------------|---------|----------------|-------------------|---------|---------|----------------|---------|----------------|----------------|
|                        |                               | Model 1           |       | Model 2        |         |                | Model 1           |         | Model 2 |                |         |                |                |
|                        |                               | $\beta$           | SE    | 95% CI         | $\beta$ | SE             | 95% CI            | $\beta$ | SE      | 95% CI         | $\beta$ | SE             | 95% CI         |
| IQ                     | Below 74                      | 0.072             | 0.007 | 0.059, 0.085   | 0.059   | 0.007          | 0.046, 0.072      | 0.050   | 0.013   | 0.025, 0.075   | 0.040   | 0.013          | 0.015, 0.066   |
|                        | 74 to 81                      | 0.055             | 0.004 | 0.047, 0.063   | 0.043   | 0.004          | 0.035, 0.052      | 0.058   | 0.009   | 0.040, 0.075   | 0.048   | 0.009          | 0.030, 0.067   |
|                        | 81 to 89                      | 0.029             | 0.003 | 0.022, 0.036   | 0.020   | 0.003          | 0.013, 0.027      | 0.040   | 0.008   | 0.024, 0.055   | 0.033   | 0.008          | 0.018, 0.048   |
|                        | 89 to 96                      | 0.014             | 0.003 | 0.008, 0.020   | 0.008   | 0.003          | 0.002, 0.014      | 0.008   | 0.007   | -0.005, 0.021  | 0.004   | 0.007          | -0.010, 0.017  |
|                        | 96 to 104 (ref)               | 0.000             |       |                | 0.000   |                |                   | 0.000   |         |                | 0.000   |                |                |
|                        | 104 to 111                    | -0.018            | 0.003 | -0.024, -0.013 | -0.011  | 0.003          | -0.017, -0.006    | -0.008  | 0.007   | -0.022, 0.005  | -0.003  | 0.007          | -0.016, 0.011  |
|                        | 111 to 119                    | -0.030            | 0.003 | -0.036, -0.024 | -0.015  | 0.003          | -0.021, -0.009    | -0.025  | 0.007   | -0.039, -0.011 | -0.013  | 0.007          | -0.027, 0.002  |
|                        | 119 to 126                    | -0.041            | 0.003 | -0.048, -0.034 | -0.019  | 0.004          | -0.026, -0.012    | -0.038  | 0.009   | -0.055, -0.021 | -0.018  | 0.009          | -0.036, -0.001 |
|                        | Above 126                     | -0.052            | 0.004 | -0.060, -0.044 | -0.024  | 0.004          | -0.033, -0.016    | -0.051  | 0.011   | -0.072, -0.031 | -0.024  | 0.011          | -0.046, -0.002 |
|                        | Not Tested                    | 0.045             | 0.009 | 0.028, 0.062   | 0.043   | 0.009          | 0.026, 0.061      | 0.098   | 0.021   | 0.057, 0.140   | 0.096   | 0.021          | 0.055, 0.137   |
| Birth Year             | Missing                       | 0.019             | 0.006 | 0.008, 0.031   | 0.022   | 0.006          | 0.010, 0.034      | 0.012   | 0.013   | -0.014, 0.038  | 0.013   | 0.013          | -0.012, 0.039  |
|                        | 1951                          | 0.012             | 0.005 | 0.002, 0.023   | 0.000   | 0.005          | -0.011, 0.011     | 0.031   | 0.012   | 0.006, 0.055   | 0.025   | 0.013          | 0.000, 0.050   |
|                        | 1952                          | 0.014             | 0.005 | 0.004, 0.024   | 0.001   | 0.005          | -0.009, 0.012     | 0.041   | 0.012   | 0.016, 0.065   | 0.036   | 0.013          | 0.011, 0.061   |
|                        | 1953                          | 0.005             | 0.005 | -0.005, 0.015  | -0.006  | 0.005          | -0.016, 0.004     | 0.027   | 0.012   | 0.003, 0.050   | 0.023   | 0.012          | -0.001, 0.046  |
|                        | 1954                          | 0.008             | 0.005 | -0.002, 0.017  | -0.003  | 0.005          | -0.013, 0.007     | 0.023   | 0.012   | 0.000, 0.045   | 0.019   | 0.012          | -0.004, 0.044  |
|                        | 1955                          | 0.005             | 0.005 | -0.004, 0.015  | -0.003  | 0.005          | -0.013, 0.006     | 0.024   | 0.011   | 0.001, 0.046   | 0.021   | 0.012          | -0.001, 0.044  |
|                        | 1956                          | -0.002            | 0.005 | -0.011, 0.007  | -0.010  | 0.005          | -0.020, -0.001    | 0.006   | 0.011   | -0.015, 0.028  | 0.003   | 0.011          | -0.018, 0.025  |
|                        | 1957                          | -0.004            | 0.005 | -0.013, 0.005  | -0.012  | 0.005          | -0.021, -0.002    | 0.018   | 0.011   | -0.004, 0.041  | 0.015   | 0.011          | -0.008, 0.037  |
|                        | 1958                          | -0.004            | 0.005 | -0.013, 0.005  | -0.010  | 0.005          | -0.020, -0.001    | 0.004   | 0.011   | -0.018, 0.025  | 0.001   | 0.011          | -0.021, 0.023  |
|                        | 1959                          | -0.012            | 0.005 | -0.021, -0.003 | -0.019  | 0.005          | -0.028, -0.010    | -0.005  | 0.011   | -0.026, 0.017  | -0.007  | 0.011          | -0.029, 0.014  |
| Education              | 1961                          | 0.000             |       |                | 0.000   |                |                   | 0.000   |         |                | 0.000   |                |                |
|                        | 1962                          | -0.007            | 0.005 | -0.017, 0.002  | -0.012  | 0.005          | -0.021, -0.003    | 0.005   | 0.011   | -0.017, 0.027  | 0.004   | 0.011          | -0.018, 0.025  |
|                        | 1963                          | 0.003             | 0.005 | -0.006, 0.012  | -0.001  | 0.005          | -0.010, 0.008     | 0.002   | 0.011   | -0.019, 0.023  | 0.001   | 0.011          | -0.020, 0.022  |
|                        | 1964                          | -0.003            | 0.005 | -0.012, 0.006  | -0.006  | 0.005          | -0.015, 0.004     | 0.029   | 0.011   | 0.006, 0.051   | 0.028   | 0.011          | 0.005, 0.050   |
|                        | 1965 (ref)                    | 0.002             | 0.005 | -0.007, 0.011  | 0.000   | 0.005          | -0.009, 0.009     | -0.002  | 0.011   | -0.023, 0.019  | -0.002  | 0.011          | -0.023, 0.019  |
|                        | 1966                          | -0.008            | 0.005 | -0.018, 0.002  | -0.005  | 0.005          | -0.015, 0.005     | -0.002  | 0.012   | -0.025, 0.021  | 0.001   | 0.012          | -0.022, 0.024  |
|                        | 1967                          | -0.012            | 0.005 | -0.022, -0.002 | -0.007  | 0.005          | -0.017, 0.002     | -0.003  | 0.012   | -0.027, 0.020  | 0.000   | 0.012          | -0.023, 0.024  |
|                        | Primary (<9 years)            |                   |       |                |         |                |                   |         |         |                |         |                |                |
|                        | Primary (9 years)             |                   |       |                | 0.014   | 0.003          | 0.009, 0.019      |         |         |                | 0.002   | 0.006          | -0.010, 0.013  |
|                        | Secondary (10-11 years) (ref) |                   |       |                | 0.000   |                |                   |         |         |                | 0.000   |                |                |
| Secondary (12 years)   |                               |                   |       | -0.018         | 0.003   | -0.023, -0.012 |                   |         |         | -0.023         | 0.007   | -0.036, -0.009 |                |
| Tertiary (13-15 years) |                               |                   |       | -0.040         | 0.003   | -0.045, -0.035 |                   |         |         | -0.038         | 0.007   | -0.050, -0.025 |                |
| Tertiary (15+ years)   |                               |                   |       | -0.047         | 0.003   | -0.052, -0.041 |                   |         |         | -0.047         | 0.007   | -0.060, -0.034 |                |
| Post-graduate          |                               |                   |       | -0.045         | 0.007   | -0.058, -0.033 |                   |         |         | -0.076         | 0.013   | -0.102, -0.050 |                |
| Family Size            | Missing                       |                   |       |                | 0.073   | 0.034          | 0.006, 0.139      |         |         |                | -0.032  | 0.050          | -0.130, 0.066  |
|                        | 2 (ref)                       |                   |       |                | 0.000   |                |                   |         |         | 0.000          |         |                |                |
|                        | 3                             |                   |       |                | 0.002   | 0.002          | -0.002, 0.007     |         |         |                | 0.016   | 0.005          | 0.005, 0.026   |
|                        | 4                             |                   |       |                | 0.016   | 0.003          | 0.010, 0.022      |         |         |                | 0.018   | 0.007          | 0.005, 0.031   |
|                        | 5                             |                   |       |                | 0.026   | 0.004          | 0.017, 0.034      |         |         |                | 0.019   | 0.009          | 0.000, 0.038   |
|                        | 6                             |                   |       |                | 0.042   | 0.006          | 0.031, 0.053      |         |         |                | 0.023   | 0.012          | 0.000, 0.046   |
| Birth Order            | 1 (ref)                       |                   |       |                | 0.000   |                |                   |         |         | 0.000          |         |                |                |
|                        | 2                             |                   |       |                | -0.015  | 0.002          | -0.019, -0.010    |         |         |                | -0.011  | 0.005          | -0.021, -0.001 |
|                        | 3                             |                   |       |                | -0.024  | 0.003          | -0.029, -0.018    |         |         |                | -0.016  | 0.007          | -0.029, -0.002 |
|                        | 4                             |                   |       |                | -0.035  | 0.004          | -0.044, -0.027    |         |         |                | -0.017  | 0.010          | -0.036, 0.003  |
|                        | 5                             |                   |       |                | -0.050  | 0.006          | -0.063, -0.038    |         |         |                | -0.015  | 0.016          | -0.045, 0.015  |
|                        | 6                             |                   |       |                | -0.061  | 0.008          | -0.076, -0.045    |         |         |                | -0.013  | 0.019          | -0.050, 0.024  |
| N                      |                               |                   |       | 163,246        |         | 163,246        |                   |         |         | 23,107         |         | 23,107         |                |
